# Supplementary material for: A complete chromosome substitution mapping panel reveals genome-wide epistasis in Arabidopsis
Source: Heredity (Edinb). 2024 Jul 9;133(3):198–205. doi: 10.1038/s41437-024-00705-1 (PMC11350127; doi:10.1038/s41437-024-00705-1)
Supplement: Supplementary file 2 — Dataset 1 [file 41437_2024_705_MOESM2_ESM.xlsx]

## Sheet: Table S3 CSL & NIL genotypes
Genotype name	AT001	AT002	AT003	AT004	AT005	AT006	AT007	AT008	AT009	AT010	AT011	AT012	AT013	AT014	AT015	AT016	AT017	AT018	AT019	AT020	AT021	AT022	AT023	AT024	AT025	AT026	AT027	AT028	AT029	AT030	AT031	AT032	AT033	AT034	AT035	AT036	AT037	AT038	AT039	AT040	AT041	AT042	AT043	AT044	AT045	AT046	AT047	AT048	AT049
CxL_01	A	A	A	A	A	A	A	A	A	A	A	A	A	A	A	A	A	A	A	A	A	A	A	A	A	A	A	A	A	A	A	A	A	A	A	A	A	A	A	A	A	A	A	A	A	A	A	A	A
CxL_02	A	A	A	A	A	A	A	A	A	A	A	A	A	A	A	A	A	A	A	A	A	A	A	A	A	A	A	A	A	A	A	A	A	A	A	A	A	A	A	A	A	A	A	A	A	A	A	A	A
CxL_03	A	A	A	A	A	A	A	A	A	A	A	A	A	A	A	A	A	A	A	A	A	A	A	A	A	A	A	A	A	A	A	A	A	A	A	A	A	A	A	A	A	A	A	A	A	A	A	A	A
CxL_04	A	A	A	A	A	A	A	A	A	A	A	A	A	A	A	A	A	A	A	A	A	A	A	A	A	A	A	A	A	A	A	A	A	A	A	A	A	A	A	A	A	A	A	A	A	A	A	A	A
CxL_05	A	A	A	A	A	A	A	A	A	A	A	A	A	A	A	A	A	A	A	A	A	A	A	A	A	A	A	A	A	A	A	A	A	A	A	A	A	A	A	A	A	A	A	A	A	A	A	A	A
CxL_06	A	A	A	A	A	A	A	A	A	A	A	A	A	A	A	A	A	A	A	A	A	A	A	A	A	A	A	A	A	A	A	A	A	A	A	A	A	A	A	A	A	A	A	A	A	A	A	A	A
CxL_07	A	A	A	A	A	A	A	A	A	A	A	A	A	A	A	A	A	A	A	A	A	A	A	A	A	A	A	A	A	A	A	A	A	A	A	A	A	A	A	A	A	A	A	A	A	A	A	A	A
CxL_08	A	A	A	A	A	A	A	A	A	A	A	A	A	A	A	A	A	A	A	A	A	A	A	A	A	A	A	A	A	A	A	A	A	A	A	A	A	A	A	A	A	A	A	A	A	A	A	A	A
CxL_09	A	A	A	A	A	A	A	A	A	A	A	A	A	A	A	A	A	A	A	A	A	A	A	A	A	A	A	A	A	A	A	A	A	A	A	B	B	B	B	B	B	B	B	B	B	B	B	B	B
CxL_10	A	A	A	A	A	A	A	A	A	A	A	A	A	A	A	A	A	A	A	A	A	A	A	A	A	A	A	A	A	A	A	A	A	A	A	B	B	B	B	B	B	B	B	B	B	B	B	B	B
CxL_11	A	A	A	A	A	A	A	A	A	A	A	A	A	A	A	A	A	A	A	A	A	A	A	A	A	A	A	A	A	A	A	A	A	A	A	B	B	B	B	B	B	B	B	B	B	B	B	B	B
CxL_12	A	A	A	A	A	A	A	A	A	A	A	A	A	A	A	A	A	A	A	A	A	A	A	A	A	A	A	A	A	A	A	A	A	A	A	B	B	B	B	B	B	B	B	B	B	B	B	B	B
CxL_13	A	A	A	A	A	A	A	A	A	A	A	A	A	A	A	A	A	A	A	A	A	A	A	A	A	A	A	A	A	A	A	A	A	A	A	B	B	B	B	B	B	B	B	B	B	B	B	B	B
CxL_14	A	A	A	A	A	A	A	A	A	A	A	A	A	A	A	A	A	A	A	A	A	A	A	A	A	A	A	A	A	A	A	A	A	A	A	B	B	B	B	B	B	B	B	B	B	B	B	B	B
CxL_15	A	A	A	A	A	A	A	A	A	A	A	A	A	A	A	A	A	A	A	A	A	A	A	A	A	A	A	A	A	A	A	A	A	A	A	B	B	B	B	B	B	B	B	B	B	B	B	B	B
CxL_16	A	A	A	A	A	A	A	A	A	A	A	A	A	A	A	A	A	A	A	A	A	A	A	A	A	A	A	A	A	A	A	A	A	A	A	B	B	B	B	B	B	B	B	B	B	B	B	B	B
CxL_17	B	B	B	B	B	B	B	B	B	B	B	B	B	B	B	B	B	B	B	B	B	B	B	B	B	B	B	B	B	B	B	B	B	B	B	A	A	A	A	A	A	A	A	A	A	A	A	A	A
CxL_18	B	B	B	B	B	B	B	B	B	B	B	B	B	B	B	B	B	B	B	B	B	B	B	B	B	B	B	B	B	B	B	B	B	B	B	A	A	A	A	A	A	A	A	A	A	A	A	A	A
CxL_19	B	B	B	B	B	B	B	B	B	B	B	B	B	B	B	B	B	B	B	B	B	B	B	B	B	B	B	B	B	B	B	B	B	B	B	A	A	A	A	A	A	A	A	A	A	A	A	A	A
CxL_20	B	B	B	B	B	B	B	B	B	B	B	B	B	B	B	B	B	B	B	B	B	B	B	B	B	B	B	B	B	B	B	B	B	B	B	A	A	A	A	A	A	A	A	A	A	A	A	A	A
CxL_21	B	B	B	B	B	B	B	B	B	B	B	B	B	B	B	B	B	B	B	B	B	B	B	B	B	B	B	B	B	B	B	B	B	B	B	A	A	A	A	A	A	A	A	A	A	A	A	A	A
CxL_22	B	B	B	B	B	B	B	B	B	B	B	B	B	B	B	B	B	B	B	B	B	B	B	B	B	B	B	B	B	B	B	B	B	B	B	A	A	A	A	A	A	A	A	A	A	A	A	A	A
CxL_23	B	B	B	B	B	B	B	B	B	B	B	B	B	B	B	B	B	B	B	B	B	B	B	B	B	B	B	B	B	B	B	B	B	B	B	A	A	A	A	A	A	A	A	A	A	A	A	A	A
CxL_24	B	B	B	B	B	B	B	B	B	B	B	B	B	B	B	B	B	B	B	B	B	B	B	B	B	B	B	B	B	B	B	B	B	B	B	A	A	A	A	A	A	A	A	A	A	A	A	A	A
CxL_25	B	B	B	B	B	B	B	B	B	B	B	B	B	B	B	B	B	B	B	B	B	B	B	B	B	B	B	B	B	B	B	B	B	B	B	B	B	B	B	B	B	B	B	B	B	B	B	B	B
CxL_26	B	B	B	B	B	B	B	B	B	B	B	B	B	B	B	B	B	B	B	B	B	B	B	B	B	B	B	B	B	B	B	B	B	B	B	B	B	B	B	B	B	B	B	B	B	B	B	B	B
CxL_27	B	B	B	B	B	B	B	B	B	B	B	B	B	B	B	B	B	B	B	B	B	B	B	B	B	B	B	B	B	B	B	B	B	B	B	B	B	B	B	B	B	B	B	B	B	B	B	B	B
CxL_28	B	B	B	B	B	B	B	B	B	B	B	B	B	B	B	B	B	B	B	B	B	B	B	B	B	B	B	B	B	B	B	B	B	B	B	B	B	B	B	B	B	B	B	B	B	B	B	B	B
CxL_29	B	B	B	B	B	B	B	B	B	B	B	B	B	B	B	B	B	B	B	B	B	B	B	B	B	B	B	B	B	B	B	B	B	B	B	B	B	B	B	B	B	B	B	B	B	B	B	B	B
CxL_30	B	B	B	B	B	B	B	B	B	B	B	B	B	B	B	B	B	B	B	B	B	B	B	B	B	B	B	B	B	B	B	B	B	B	B	B	B	B	B	B	B	B	B	B	B	B	B	B	B
CxL_31	B	B	B	B	B	B	B	B	B	B	B	B	B	B	B	B	B	B	B	B	B	B	B	B	B	B	B	B	B	B	B	B	B	B	B	B	B	B	B	B	B	B	B	B	B	B	B	B	B
CxL_32	B	B	B	B	B	B	B	B	B	B	B	B	B	B	B	B	B	B	B	B	B	B	B	B	B	B	B	B	B	B	B	B	B	B	B	B	B	B	B	B	B	B	B	B	B	B	B	B	B
L1C-007		A		A	A	A		A	A		A		A	A		A		A		A	A	A	A	A		A	A	A	A	A	A		A	A		A				A
L1C-024		A		B	B	B		A	A		A		A	A		A		A		A	A	A	A	A		A	A	A	A	A	A		A	A		A				A
L1C-022		B		B	B	B		B	A		A		A	A		A		A		A	A	A	A	A		A	A	A	A	A	A		A	A		A				A
L1C-003		A		A	B	B		B	B		A		A	A		A		A		A	A	A	A	A		A	A	A	A	A	A		A	A		A				A
L1C-010		B		B	B	B		B	B		A		A	A		A		A		A	A	A	A	A		A	A	A	A	A	A		A	A		A				A
L1C-032		B		B	B	B		B	B		B		B	B		B		A		A	A	A	A	A		A	A	A	A	A	A		A	A		A				A
L1C-035		B		B	B	B		B	B		B		B	B		B		B		A	A	A	A	A		A	A	A	A	A	A		A	A		A				A
L1C-017		A		A	A	A		A	A		A		A	A		A		B		B	B	B	B	B		A	A	A	A	A	A		A	A		A				A
L1C-051		B		B	B	B		B	B		B		B	B		B		B		B	B	B	B	B		A	A	A	A	A	A		A	A		A				A
L1C-065				B	A	A		A	A					A		A		A		A	A	A	A			A	A	A	A	A	A		A	A		A				A
L1C-056		A		A	A	A		A	A		A		A	A		B		B		B	B	B	B			A	A	A	A	A	A		A	A		A				A
L1C-088		B		B	B	B		B	B		B		B	B		B		B		B	B	B	B			A	A	A	A	A	A		A	A		A				A
L1C-074		A		A	A	A		A	A					B		B		B		B	B	B	B			A	A	A	A	A	A		A	A		A				A
L1C-094		A		A	A	A		A	B		B		B	B		B		B		B	B	B	B	B		B	A	A	A	A	A		A	A		A				A
L1C-059		B		B	B	B		B	B		B		B	B		B		B		B	B	B	B	B		B	A	A	A	A	A		A	A		A				A
L1C- 053		A		A	A	A		A	A		A		A	A		A		A		A	B	B	B	B		B	B	A	A	A	A		A	A		A				A
L1C-098		A		A	A	A		A	A		A		A	A		A		A		B	B	B	B	B		B	B	A	A	A	A		A	A		A				A
L1C-040		B		B	B	B		A	A		A		A	A		A		A		B	B	B	B	B		B	B	A	A	A	A		A	A		A				A
L1C-001		A		A	A	A		A	A		A		B	B		B		B		B	B	B	B	B		B	B	A	A	A	A		A	A		A				A
L1C-058		B		B	B	B		B	B		B		B	B		B		B		B	B	B	B	B		B	B	A	A	A	A		A	A		A				A
L1C-020		B		B	B	B		B	A		A		A	A		A		A		A	A	A	A	A		B	B	B	A	A	A		A	A		A				A
L1C-067		A		A	A	A		A	A		A		A	A		A		A		B	B	B	B	B		B	B	B	A	A	A		A	A		A				A
L1C-076		A		A	A	A		A	A		A		A	A		A		B		B	B	B	B	B		B	B	B	A	A	A		A	A		A				A
L1C-034		B		B	B	B		B	B		B		B	B		B		B		B	B	B	B	B		B	B	B	A	A	A		A	A		A				A
L1C-002		A		A	A	A		A	A		A		A	A		A		A		A	A	A	A	A		B	B	B	B	A	A		A	A		A				A
L1C-021		B		B	B	B		B	B		B		B	B		A		A		A	A	A	A	B		B	B	B	B	A	A		A	A		A				A
L1C-095		A		A	A	A		A	A		A		A	A		A		A		A	A	A	B	B		B	B	B	B	A	A		A	A		A				A
L1C-029		A		A	A	A		A	A		A		A	A		A		A		A	A	B	B	B		B	B	B	B	A	A		A	A		A				A
L1C-008		A		A	A	A		A	A		A		A	A		A		B		B	B	B	B	B		B	B	B	B	A	A		A	A		A				A
L1C-084		A		A	B	B		B	B		B		B	B		B		B		B	B	B	B	B		B	B	B	B	A	A		A	A		A				A
L1C-072		B		B	B	B		B	B		B		B	B		B		B		B	B	B	B	B		B	B	B	B	A	A		A	A		A				A
L1C-033		B		B	B	B		B	B		B		A	A		A		A		A	A	A	A	A		A	A	A	A	B	A		A	A		A				A
L1C-039		A		A	A	A		A	A		A		A	A		A		A		A	A	A	A	B		B	B	B	B	B	A		A	A		A				A
L1C-047		A		A	A	A		A	A		A		A	A		A		A		B	B	B	B	B		B	B	B	B	B	A		A	A		A				A
L1C-025		A		A	A	A		A	A		A		A	A		A		B		B	B	B	B	B		B	B	B	B	B	A		A	A		A				A
L1C-015		B		B	B	B		B	B		B		B	B		B		B		B	B	B	B	B		B	B	B	B	B	B		A	A		A				A
L1C-023		A		A	A	A		A	A		A		A	A		A		A		A	A	A	A	A		A	A	A	A	A	A		A	B		A				A
L1C-018		A		A	A	A		A	A		A		A	A		A		A		A	A	A	A	A		A	A	A	A	A	A		B	B		A				A
L1C-030		A		A	A	A		A	A		A		A	A		A		B		B	B	B	B	B		B	B	A	A	A	B		B	B		A				A
L1C-081		A		A	A	A		A	A		A		A	A		A		A		A	A	A	A	A		A	A	A	A	B	B		B	B		A				A
L1C-096		A		A	B	B		B	B		B		B	B		A		A		A	A	A	A	A		A	A	A	A	B	B		B	B		A				A
L1C-069		A		A	A	A		A	A		A		A	A		A		A		A	A	A	A	A		A	A	B	B	B	B		B	B		A				A
L1C-005		A		A	A	A		A	A		A		A	A		A		A		A	A	A	A	A		B	B	B	B	B	B		B	B		A				A
L1C-042		A		A	A	A		A	A		A		A	A		A		A		A	A	A	A	B		B	B	B	B	B	B		B	B		A				A
L1C-038		A		A	A	A		A	A		A		A	A		A		A		A	B	B	B	B		B	B	B	B	B	B		B	B		A				A
L1C-013		B		B	B	B		B	B		A		A	A		A		A		A	B	B	B	B		B	B	B	B	B	B		B	B		A				A
L1C-043		A		A	A	A		A	A		A		A	A		A		B		B	B	B	B	B		B	B	B	B	B	B		B	B		A				A
L1C-089		A		A	A	A		A	A		A		A	A		B		B		B	B	B	B	B		B	B	B	B	B	B		B	B		A				A
L1C-006		A		B	B	B		B	B		B		B	B		B		B		B	B	B	B	B		B	B	B	B	B	B		B	B		A				A
L1C-016		B		B	B	B		B	B		B		B	B		B		B		B	B	B	B	B		B	B	B	B	B	B		B	B		A				A
L1C-080		A		A	A	A		A	A							B		B		B	B	B	B	B		B	B	B	B	B	B		B	B		A				A
L1C-091		B		B	B	B		B	B		B		B	B		A		A		A	A	A	A			B	B	B	B	B	B		B	B		A				A
L2C-003		A																						A										A		A	A	A		A	A	A	A		A	A	A		A
L2C-044		A																						A										A		B	B	A		A	A	A	A		A	A	A		A
L2C-102		A																						A										A		B	B	B		B	A	A	A		A	A	A		A
L2C-036		A																						A										A		B	B	B		B	B	B	A		A	A	A		A
L2C-028		A																						A										A		A	A	A		B	B	B	B		B	B	A		A
L2C-006		A																						A										A		A	A	A		A	B	B	B		B	B	B		B
L2C-117		A																						A										A		A	A	A		A	A	A	A		A	A	B		B
L2C-041		A																						A										A		A	A	B		B	B	B	B		B	B	B		B
L2C-002		A																						A										A		B	B	B		B	B	B	B		B	B	B		B
L2C-013		A																						A										A		B	B	B		B	B	B	B		B	B	B		B
L2C-032		A																						A										A		B	B	B		B	B	B	B		B	B	B		B
L2C-045		A																						A										A		A	A	A		A	A	B	B		B	B	B		B
L2C-040		A																						A										A		A	A	B		B	B	B	B		B	B	B		B
L2C-019		A																						A										A		B	B	B		B	B	B	B		B	B	B		B
L2C-023		A																						A										A		A	A	A		A	A	A	A		A	A	A		A
L2C-114		A																						A										A		B	B	B		B	B	B	B		B	B			A
L2C-052		A																						A										A		A	A	A		A	A	A	A		A	A	A		A
L2C-081		A																						A										A		B	A	A		A	A	A	A		A	A	A		A
L2C-074		A																						A										A		B	B	B		B	B	B	B		A	A	A		A
L2C-084		A																						A										A		B	B	B		B	B	B	B		B	A	A		A
L2C-118		A																						A										A		B	B	B		B	B	B	B		B	B	A		A
L2C-063		A																						A										A		A	A	A		B	B	B	B		B	A	A		A
L2C-073		A																						A										A		A	A	A		A	A	A	A		A	A	A		A
L2C-087		A																						A										A		B	B	B		A	A	A	A		A	A	A		A
L2C-099		A																						A										A		A	A	B		B	B	B	A		A	A	A		A
L2C-098		A																						A										A		A	A	A		A	A	A	A		A	A	A		A
L2C-079		A																						A										A		B	B	A		A	A	A	A		A	A	A		A
L2C-097		A																						A										A		A	A	A		A	A	A	A		A	A	A		A
L2C-011		A																						A										A		A	A	A		A	A	A	A		A	A	A		A
L2C-031		A																						A										A		B	B	A		A	A	A	A		A	A	B		B
L2C-030		A																						A										A		B	B	B		A	A	A	A		A	B	B		B
L2C-018		A																						A										A		A	A	A		A	A	A	A		B	B	B		B
L2C-005		A																						A										A		A	A	A		A	A	A	B		B	B	B		B
L2C-007		A																						A										A		A	A	A		A	B	B	B		B	B	B		B
L2C-001		A																						A										A		A	A	B		B	B	B	B		B	B	B		B
L2C-106		A																						A										A		A	B	B		B	B	B	B		B	B	B		B
L2C-020		A																						A										A		B	B	B		B	B	B	B		B	B	B		B
L3C-54		A																						A										A		A				A
L3C-101		A																						A										A		A				A
L3C-36		A																						A										A		A				A
L3C-095		A																						A										A		A				A
L3C-109		A																						A										A		A				A
L3C-073		A																						A										A		A				A
L3C-48		A																						A										A		A				A
L3C-62		A																						A										A		A				A
L3C-65		A																						A										A		A				A
L3C-103		A																						A										A		A				A
L3C-069		A																						A										A		A				A
L3C-094		A																						A										A		A				A
L3C-099		A																						A										A		A				A
L3C-34		A																						A										A		A				A
L3C-123		A																						A										A		A				A
L3C-52		A																						A										A		A				A
L3C-56		A																						A										A		A				A
L3C-081		A																						A										A		A				A
L3C-125		A																						A										A		A				A
L3C-46		A																						A										A		A				A
L3C-106		A																						A										A		A				A
L3C-37		A																						A										A		A				A
L3C-088		A																						A										A		A				A
L3C-40		A																						A										A		A				A
L3C-104		A																						A										A		A				A
L3C_076		A																						A										A		A				A
L3C-115		A																						A										A		A				A
L3C-124		A																						A										A		A				A
L3C-074		A																						A										A		A				A
L3C-58		A																						A										A		A				A
L3C-113		A																						A										A		A				A
L3C_075		A																						A										A		A				A
L3C-082		A																						A										A		A				A
L3C-110		A																						A										A		A				A
L3C-29		A																						A										A		A				A
L3C-102		A																						A										A		A				A
L3C-079		A																						A										A		A				A
L3C-45		A																						A										A		A				A
L3C-105		A																						A										A		A				A
L3C-107		A																						A										A		A				A
L3C-091		A																						A										A		A				A
L3C-108		A																						A										A		A				A
L3C-55		A																						A										A		A				A
L4C-001		A																						A										A		A				A
L4C-023		A																						A										A		A				A
L4C-083		A																						A										A		A				A
L4C-046		A																						A										A		A				A
L4C-022		A																						A										A		A				A
L4C-003		A																						A										A		A				A
L4C-015		A																						A										A		A				A
L4C-084		A																						A										A		A				A
L4C-062		A																						A										A		A				A
L4C-044		A																						A										A		A				A
L4C-033		A																						A										A		A				A
L4C-099		A																						A										A		A				A
L4C-110		A																						A										A		A				A
L4C-038		A																						A										A		A				A
L4C-002		A																						A										A		A				A
L4C-112		A																						A										A		A				A
L4C-013		A																						A										A		A				A
L4C-016		A																						A										A		A				A
L4C-030		A																						A										A		A				A
L4C-042		A																						A										A		A				A
L4C-040		A																						A										A		A				A
L4C-054		A																						A										A		A				A
L4C-007		A																						A										A		A				A
L4C-018		A																						A										A		A				A
L4C-053		A																						A										A		A				A
L4C-031		A																						A										A		A				A
L4C-006		A																						A										A		A				A
L4C-039		A																						A										A		A				A
L4C-068		A																						A										A		A				A
L4C-037		A																						A										A		A				A
L4C-008		A																						A										A		A				A
L4C-078		A																						A										A		A				A
L4C-073		A																						A										A		A				A
L4C-090		A																						A										A		A				A
L4C-004		A																						A										A		A				A
L4C-066		A																						A										A		A				A
L4C-108		A																						A										A		A				A
L4C-024		A																						A										A		A				A
L4C-032		A																						A										A		A				A
L4C-058		A																						A										A		A				A
L4C-059		A																						A										A		A				A
L4C-005		A																						A										A		A				A
L5C-016		A																						A										A		A				A
L5C-015		A																						A										A		A				A
L5C-046		A																						A										A		A				A
L5C-004		A																						A										A		A				A
L5C-013		A																						A										A		A				A
L5C-039		A																						A										A		A				A
L5C-001		A																						A										A		A				A
L5C-065		A																						A										A		A				A
L5C-076		A																						A										A		A				A
L5C-020		A																						A										A		A				A
L5C-044		A																						A										A		A				A
L5C-054		A																						A										A		A				A
L5C-040		A																						A										A		A				A
L5C-066		A																						A										A		A				A
L5C-073		A																						A										A		A				A
L5C-003		A																						A										A		A				A
L5C-026		A																						A										A		A				A
L5C-077		A																						A										A		A				A
L5C-023		A																						A										A		A				A
L5C-086		A																						A										A		A				A
L5C-050		A																						A										A		A				A
L5C-019		A																						A										A		A				A
L5C-037		A																						A										A		A				A
L5C-082		A																						A										A		A				A
L5C-031		A																						A										A		A				A
L5C-041		A																						A										A		A				A
L5C-007		A																						A										A		A				A
L5C-027		A																						A										A		A				A
L5C-058		A																						A										A		A				A
L5C-047		A																						A										A		A				A
L5C-081		A																						A										A		A				A
L5C-051		A																						A										A		A				A
L5C-008		A																						A										A		A				A
L5C-056		A																						A										A		A				A
L5C-017		A																						A										A		A				A
L5C-025		A																						A										A		A				A
L5C-075		A																						A										A		A				A
L5C-048		A																						A										A		A				A
L5C-034		A																						A										A		A				A
L5C-028		A																						A										A		A				A
L5C-062		A																						A										A		A				A
L5C-002		A																						A										A		A				A
L5C-014		A																						A										A		A				A
L5C-018		A																						A										A		A				A
L5C-005		A																						A										A		A				A
C1L-092		A		A	A	A		A	A				A		A	A		A			A	A	A		A		A	A	A	A				A		B				B
C1L-004		B		A	A	A		A	A				A		A	A		A			A	A	A		A		A	A	A	A				A		B				B
C1L-079		B		B	A	A		A	A				A		A	A		A			A	A	A		A		A	A	A	A				A		B				B
C1L-051		B		B	B	B		A	A				A		A	A		A			A	A	A		A		A	A	A	A				A		B				B
C1L-011		B		B	B	B		B	A				A		A	A		A			A	A	A		A		A	A	A	A				A		B				B
C1L-040		A		A	A	A		A	B				A		A	A		A			A	A	A		A		A	A	A	A				A		B				B
C1L-037		B		B	B	B		B	B				A		A	A		A			A	A	A		A		A	A	A	A				A		B				B
C1L-055		B		B	B	B		B	B				B		B	A		A			A	A	A		A		A	A	A	A				A		B				B
C1L-062		A		A	A	A		A	B				B		B	B		B			B	A	A		A		A	A	A	A				A		B				B
C1L-025		B		B	B	B		B	B				B		B	B		B			B	A	A		A		A	A	A	A				A		B				B
C1L-014		A		A	A	A		A	A				A		A	A		B			B	B	B		A		A	A	A	A				A		B				B
C1L-061		A		A	A	A		B	B				B		B	B		B			B	B	B		A		A	A	A	A				A		B				B
C1L-069		A		A	A	B		B	B				B		B	B		B			B	B	B		A		A	A	A	A				A		B				B
C1L-052		A		B	B	B		B	B				B		B	B		B			B	B	B		A		A	A	A	A				A		B				B
C1L-048		B		B	B	B		B	B				B		B	B		B			B	B	B		A		A	A	A	A				A		B				B
C1L-073		A		A	A	A		A	A				A		A	A		A			A	A	A		A		B	A	A	A				A		B				B
C1L-078		B		B	B	B		B	B				B		B	B		B			B	B	B		B		B	A	A	A				A		B				B
C1L-003		B		B	B	B		A	A				A		A	A		A			A	A	A		B		B	B	A	A				A		B				B
C1L-047		B		B	B	B		B	B				B		B	B		B			B	B	B		B		B	B	A	A				A		B				B
C1L-009		B		B	B	B		B	B				B		B	B		B			B	B	B		A		A	B	B	A				A		B				B
C1L-066		B		B	A	A		A	A				A		A	A		A			A	A	A		A		B	B	B	A				A		B				B
C1L-042		A		A	A	A		A	A				A		A	A		A			A	A	A		B		B	B	B	A				A		B				B
C1L-005		A		A	A	A		A	A				A		A	A		A			A	A	B		B		B	B	B	A				A		B				B
C1L-053		A		A	A	A		A	A				A		A	A		A			A	B	B		B		B	B	B	A				A		B				B
C1L-080		A		A	A	A		A	A				A		A	B		B			B	B	B		B		B	B	B	A				A		B				B
C1L-084		A		A	A	A		A	A				A		A	A		B			B	B	B		B		B	B	B	A				A		B				B
C1L-022		A		A	A	A		A	A				B		B	B		B			B	B	B		B		B	B	B	A				A		B				B
C1L-071		A		A	A	A		A	B				B		B			B			B	B	B		B		B	B	B	A				A		B				B
C1L-018		B		B	B	B		B	B				B		B	B		B			B	B	B		B		B	B	B	A				A		B				B
C1L-064		A		A	A	A		A	A				A		A	A		A			A	A	A		A		A	A	A	A				B		B				B
C1L-006		B		B	A	A		A	A				A		A	A		A			A	A	A		A		A	A	A	A				B		B				B
C1L-029		B		B	B	A		A	A				A		A	A		A			A	A	A		A		A	A	A	A				B		B				B
C1L-068		B		B	B	B		B	B				A		A	A		A			A	A	A		A		A	A	A	A				B		B				B
C1L-038		A		A	A	A		A	B				B		B	B		A			A	A	A		A		A	A	A	A				B		B				B
C1L-013		A		A	B	B		B	B				B		B	B		B			B	B	B		A		A	A	A	A				B		B				B
C1L-039		B		B	B	B		B	B				B		B	B		B			B	B	B		B		A	A	A	A				B		B				B
C1L-035		A		A	A	A		A	A				B		B	B		B			B	B	B		B		B	A	A	A				B		B				B
C1L-060		B		B	B	B		B	B				B		B	B		B			B	B	B		B		B	A	A	A				B		B				B
C1L-028		A		A	A	A		A	A				A		A	A		B			A	A	A		A		B	B	B	A				B		B				B
C1L-020		A		A	A	A		A	A				A		A	A		A			A	A	A		A		A	A	A	B				B		B				B
C1L-031		B		B	B	B		B	A				A		A	A		A			A	A	A		A		A	A	A	B				B		B				B
C1L-075		B		B	B	B		B	B				A		A	A		A			A	A	A		A		A	A	A	B				B		B				B
C1L-015		B		B	B	B		B	B				B		B	B		B			A	A	A		A		A	A	A	B				B		B				B
C1L-043		A		A	A	A		A	A				A		A	B		B			B	B	B		A		A	A	A	B				B		B				B
C1L-067		A		A	A	A		A	A				A		A	A		A			A	A	A		A		A	A	B	B				B		B				B
C1L-012		A		A	A	A		A	A				A		A	A		A			A	A	A		A		B	B	B	B				B		B				B
C1L-036		B		A	A	A		A	A				A		A	A		A			A	A	A		A		B	B	B	B				B		B				B
C1L-030		A		A	A	A		A	A				A		A	A		A			A	A	A		B		B	B	B	B				B		B				B
C1L-017		A		A	A	A		B	B				B		B	B		B			B	B	B		B		B	B	B	B				B		B				B
C1L-070		A		B	B	B		B	B				B		B	B		B			B	B	B		B		B	B	B	B				B		B				B
C1L-056		B		B	B	B		B	B				B		B	B		B			B	B	B		B		B	B	B	B				B		B				B
C2L-005		B																						B										B				A	A	A	A	A		A	A	A	A	A	A
C2L-021		B																						B										B				B	A	A	A	A		A	A	A	A	A	A
C2L-018		B																						B										B				B	B	A	A	A		A	A	A	A	A	A
C2L-098		B																						B										B			B		B	B	A	A		A	A	A	A	A	A
C2L-047		B																						B										B				B	B	B	B	A		A	A	A	A	A	A
C2L-057		B																						B										B				B	B	B	B	B		B	B	A	A	A	A
C2L-100		B																						B										B			B		B	B	B	B		B	B	B	A	A	A
C2L-064		B																						B										B				B	B	B	B	B		B	B	B	B	A	A
C2L-102		B																						B										B			B		B	B	B	B		B	B	B	B	B	B
C2L-052		B																						B										B				B	B	B	B	B		B	B	B	B	B	B
C2L-088		B																						B										B			B		B	B	B	B		B	B	B	B	B	B
C2L-062		B																						B										B				A	A	A	A	A		A	A	B	B	B	B
C2L-036		B																						B										B				A	A	A	A	A		B	B	B	B	B	B
C2L-066		B																						B										B				A	A	A	B	B		B	B	B	B	B	B
C2L-072		B																						B										B				B	B	B	B	B		B	B	B	B	B	B
C2L-095		B																						B										B			A		A	A	A	A		B	B	B	B	B	B
C2L-019		B																						B										B				A	A	A	B	B		B	B	B	B	B	B
C2L-077		B																						B										B				B	B	B	B	B		B	B	B	B	B	B
C2L-039		B																						B										B				A	A	A	A	A		A	A	B	B	B	B
C2L-109		B																						B										B			A		A	A	A	A		A	A	A	A	A	A
C2L-042		B																						B										B				B	B	B	A	A		A	A	A	A	A	A
C2L-016		B																						B										B				A	A	A	A	A		A	A	A	A	A	A
C2L-076		B																						B										B				A	A	A	A	A		A	A	A	A	A	A
C2L-059		B																						B										B				B	B	B	B	B		A	A	A	A	A	A
C2L-086		B																						B										B			A		A	A	A	A		A	A	A	A	A	A
C2L-094		B																						B										B			B		B	B	B	B		B	B	B	A	A	A
C2L-104		B																						B										B			A		A	A	A	A		A	A	A	A	A	A
C2L-056		B																						B										B				B	B	B	A	A		A	A	A	A	A	A
C2L-014		B																						B										B				A	A	A	A	A		A	A	A	A	A	A
C2L-009		B																						B										B				A	A	A	A	A		A	A	A	A	A	B
C2L-017		B																						B										B				A	A	A	A	A		A	A	A	A	B	B
C2L-117		B																						B										B			A		A	A	A	A		A	A	A	B	B	B
C2L-010		B																						B										B				A	A	A	A	A		A	B	B	B	B	B
C2L-080		B																						B										B				A	A	A	A	A		B	B	B	B	B	B
C2L-082		B																						B										B				A	A	A	A	B		B	B	B	B	B	B
C2L-002		B																						B										B				A	A	A	B	B		B	B	B	B	B	B
C2L-105		B																						B										B			A		A	B	B	B		B	B	B	B	B	B
C2L-003		B																						B										B				B	B	B	B	B		B	B	B	B	B	B
C2L-097		B																						B										B			A		B	B	B	B		B	B	B	B	B	B
C3L-014		B																						B										B		B				B
C3L-057		B																						B										B		B				B
C3L-032		B																						B										B		B				B
C3L-010		B																						B										B		B				B
C3L-019		B																						B										B		B				B
C3L-024		B																						B										B		B				B
C3L-008		B																						B										B		B				B
C3L-061		B																						B										B		B				B
C3L-004		B																						B										B		B				B
C3L-064		B																						B										B		B				B
C3L-045		B																						B										B		B				B
C3L-016		B																						B										B		B				B
C3L-018		B																						B										B		B				B
C3L-041		B																						B										B		B				B
C3L-044		B																						B										B		B				B
C3L-013		B																						B										B		B				B
C3L-020		B																						B										B		B				B
C3L-049		B																						B										B		B				B
C3L-021		B																						B										B		B				B
C3L-009		B																						B										B		B				B
C3L-062		B																						B										B		B				B
C3L-043		B																						B										B		B				B
C3L-022		B																						B										B		B				B
C4L-001		B																						B										B		B				B
C4L-028		B																						B										B		B				B
C4L-093		B																						B										B		B				B
C4L-006		B																						B										B		B				B
C4L-020		B																						B										B		B				B
C4L-019		B																						B										B		B				B
C4L-004		B																						B										B		B				B
C4L-005		B																						B										B		B				B
C4L-042		B																						B										B		B				B
C4L-038		B																						B										B		B				B
C4L-043		B																						B										B		B				B
C4L-039		B																						B										B		B				B
C4L-016		B																						B										B		B				B
C4L-079		B																						B										B		B				B
C4L-077		B																						B										B		B				B
C4L-010		B																						B										B		B				B
C4L-026		B																						B										B		B				B
C4L-047		B																						B										B		B				B
C4L-025		B																						B										B		B				B
C4L-046		B																						B										B		B				B
C4L-008		B																						B										B		B				B
C4L-014		B																						B										B		B				B
C4L-073		B																						B										B		B				B
C4L-058		B																						B										B		B				B
C4L-054		B																						B										B		B				B
C4L-009		B																						B										B		B				B
C4L-017		B																						B										B		B				B
C4L-012		B																						B										B		B				B
C4L-045		B																						B										B		B				B
C4L-018		B																						B										B		B				B
C5L-083		B																						B										B		B				B
C5L-072		B																						B										B		B				B
C5L-028		B																						B										B		B				B
C5L-071		B																						B										B		B				B
C5L-055		B																						B										B		B				B
C5L-031		B																						B										B		B				B
C5L-044		B																						B										B		B				B
C5L-006		B																						B										B		B				B
C5L-048		B																						B										B		B				B
C5L-001		B																						B										B		B				B
C5L-073		B																						B										B		B				B
C5L-081		B																						B										B		B				B
C5L-027		B																						B										B		B				B
C5L-077		B																						B										B		B				B
C5L-066		B																						B										B		B				B
C5L-061		B																						B										B		B				B
C5L-050		B																						B										B		B				B
C5L-024		B																						B										B		B				B
C5L-008		B																						B										B		B				B
C5L-003		B																						B										B		B				B
C5L-080		B																						B										B		B				B
C5L-035		B																						B										B		B				B
C5L-067		B																						B										B		B				B
C5L-037		B																						B										B		B				B
C5L-057		B																						B										B		B				B
C5L-059		B																						B										B		B				B
C5L-042		B																						B										B		B				B
C5L-026		B																						B										B		B				B
C5L-018		B																						B										B		B				B
C5L-045		B																						B										B		B				B
C5L-068		B																						B										B		B				B
C5L-029		B																						B										B		B				B
C5L-069		B																						B										B		B				B
C5L-060		B																						B										B		B				B
C5L-038		B																						B										B		B				B
C5L-074		B																						B										B		B				B
C5L-002		B																						B										B		B				B
C5L-064		B																						B										B		B				B
C5L-021		B																						B										B		B				B
C5L-014		B																						B										B		B				B
C5L-046		B																						B										B		B				B
C5L-025		B																						B										B		B				B
C5L-033		B																						B										B		B				B
C5L-047		B																						B										B		B				B
C5L-085		B																						B										B		B				B
C5L-009		B																						B										B		B				B
C5L-063		B																						B										B		B				B
C5L-082		B																						B										B		B				B
C5L-004		B																						B										B		B				B
C5L-053		B																						B										B		B				B
C5L-056		B																						B										B		B				B
[truncated: 102 more columns]

## Sheet: Table S4 Marker information
Marker	Alternative names:	Chromosome	Physical position	Allele Col	Allele Ler	Primer A1 (Col)	Length A1	A1 with FAM-tail	Primer A2 (Ler)	Length A2	A2 with VIC-tail	C-primer	Length C-primer
AT001	K1_00032210	1	32210	T	C	ATACGATCAACCTGAATGAGAGAATT	26	GAAGGTGACCAAGTTCATGCTATACGATCAACCTGAATGAGAGAATT	ATACGATCAACCTGAATGAGAGAATC	26	GAAGGTCGGAGTCAACGGATTATACGATCAACCTGAATGAGAGAATC	GGTTTTCTTATAGCAAAATCAATCTCAA	28
AT002		1	592939	T	C	GAGAACCAAGCTCATAAATCCTCTCT	26	GAAGGTGACCAAGTTCATGCTGAGAACCAAGCTCATAAATCCTCTCT	AGAACCAAGCTCATAAATCCTCTCC	25	GAAGGTCGGAGTCAACGGATTAGAACCAAGCTCATAAATCCTCTCC	AGGTTCACGAAACGAATTGAGAAATGGAT	29
AT003		1	1145010	G	C	AGTAGAAGAGATGAGAGTCATTGGG	25	GAAGGTGACCAAGTTCATGCTAGTAGAAGAGATGAGAGTCATTGGG	AGTAGAAGAGATGAGAGTCATTGGC	25	GAAGGTCGGAGTCAACGGATTAGTAGAAGAGATGAGAGTCATTGGC	CCGTACAGTGTGGCTCACTGCTT	23
AT004		1	1731568	A	T	GAGGGTACGCATTGGACTAATTCTA	25	GAAGGTGACCAAGTTCATGCTGAGGGTACGCATTGGACTAATTCTA	GAGGGTACGCATTGGACTAATTCTT	25	GAAGGTCGGAGTCAACGGATTGAGGGTACGCATTGGACTAATTCTT	CCCTGCAAGAACATATTGATATGTCCATA	29
AT005		1	3069530	T	C	GAGACCCAAGTTTGTTCCTTCTTCTT	26	GAAGGTGACCAAGTTCATGCTGAGACCCAAGTTTGTTCCTTCTTCTT	AGACCCAAGTTTGTTCCTTCTTCTC	25	GAAGGTCGGAGTCAACGGATTAGACCCAAGTTTGTTCCTTCTTCTC	GTTAGTAGTTACCGATTATAAAGTCTAGAA	30
AT006		1	3504562	A	T	TCATTCATAGCCTGACACTGCCAA	24	GAAGGTGACCAAGTTCATGCTTCATTCATAGCCTGACACTGCCAA	CATTCATAGCCTGACACTGCCAT	23	GAAGGTCGGAGTCAACGGATTCATTCATAGCCTGACACTGCCAT	CATTTTGTGGTATTCAAAATGAGGTGCTTA	30
AT007		1	3639845	T	C	GTATCCATCCATCTTTGAACATGTTCT	27	GAAGGTGACCAAGTTCATGCTGTATCCATCCATCTTTGAACATGTTCT	ATCCATCCATCTTTGAACATGTTCC	25	GAAGGTCGGAGTCAACGGATTATCCATCCATCTTTGAACATGTTCC	AAAACGCGGGGATACTTTGGTAAAAGAAA	29
AT008		1	4029763	G	A	GTAAGATAGCTTTAAGAAAAGTGAAAGTG	29	GAAGGTGACCAAGTTCATGCTGTAAGATAGCTTTAAGAAAAGTGAAAGTG	CATGTAAGATAGCTTTAAGAAAAGTGAAAGTA	32	GAAGGTCGGAGTCAACGGATTCATGTAAGATAGCTTTAAGAAAAGTGAAAGTA	GTGGTGAAGACTGTAAGAATCTGGAATTT	29
AT009		1	4422339	A	T	ATTAGAACAATAAACTCGGTGAGCGA	26	GAAGGTGACCAAGTTCATGCTATTAGAACAATAAACTCGGTGAGCGA	AGAACAATAAACTCGGTGAGCGT	23	GAAGGTCGGAGTCAACGGATTAGAACAATAAACTCGGTGAGCGT	GGTAAGAAACCAAAACACTTTAAGACCGAA	30
AT010		1	6241157	A	T	GAGCGTAATATAACTACCACGTTAAGAAA	29	GAAGGTGACCAAGTTCATGCTGAGCGTAATATAACTACCACGTTAAGAAA	GAGCGTAATATAACTACCACGTTAAGAAT	29	GAAGGTCGGAGTCAACGGATTGAGCGTAATATAACTACCACGTTAAGAAT	CAGCATTTATTCAAGATTTGTATCGCTTAT	30
AT011		1	6433226	A	G	TTGCAGACTATGTTACCGGCGA	22	GAAGGTGACCAAGTTCATGCTTTGCAGACTATGTTACCGGCGA	GCAGACTATGTTACCGGCGG	20	GAAGGTCGGAGTCAACGGATTGCAGACTATGTTACCGGCGG	GCTGACATCGTACCTGGTCGACAT	24
AT012		1	6618557	T	C	GTATGCTTTCCGATCATAATTATCGTCT	28	GAAGGTGACCAAGTTCATGCTGTATGCTTTCCGATCATAATTATCGTCT	ATGCTTTCCGATCATAATTATCGTCC	26	GAAGGTCGGAGTCAACGGATTATGCTTTCCGATCATAATTATCGTCC	TAGTGATCAAAACGGATTACAACGAGCAT	29
AT013		1	7203873	C	A	ATTGCTCATTGGTTAATCAGAGACTC	26	GAAGGTGACCAAGTTCATGCTATTGCTCATTGGTTAATCAGAGACTC	GCTCATTGGTTAATCAGAGACTA	23	GAAGGTCGGAGTCAACGGATTGCTCATTGGTTAATCAGAGACTA	TACCCTGACCATTTGAGCTTTCAGAATTT	29
AT014	WAK1	1	7439943	G	T	ATTAGTTTAAGCTTAATTTGAGGTGGAAAG	30	GAAGGTGACCAAGTTCATGCTATTAGTTTAAGCTTAATTTGAGGTGGAAAG	AGTTTAAGCTTAATTTGAGGTGGAAAT	27	GAAGGTCGGAGTCAACGGATTAGTTTAAGCTTAATTTGAGGTGGAAAT	CTGTTCTTTTCTGGATATCACAAGGCAAA	29
AT015		1	7801064	C	A	AGTTTATAGGAAATTGATTTTGAATTGACTTC	32	GAAGGTGACCAAGTTCATGCTAGTTTATAGGAAATTGATTTTGAATTGACTTC	AGTTTATAGGAAATTGATTTTGAATTGACTTA	32	GAAGGTCGGAGTCAACGGATTAGTTTATAGGAAATTGATTTTGAATTGACTTA	CTCAAAATGATCTCGTTTATCTTACAGGAT	30
AT016	M235	1	8166955	T	C	ACTCAATAACGATCTCCTATACATTTATTTTAT	33	GAAGGTGACCAAGTTCATGCTACTCAATAACGATCTCCTATACATTTATTTTAT	CTCAATAACGATCTCCTATACATTTATTTTAC	32	GAAGGTCGGAGTCAACGGATTCTCAATAACGATCTCCTATACATTTATTTTAC	GGCAAATTTAATCTTTCTTTCATTTTGGTT	30
AT017		1	8364961	T	G	ATGTAGATTCAGTACGCTTGTGCAAT	26	GAAGGTGACCAAGTTCATGCTATGTAGATTCAGTACGCTTGTGCAAT	GTAGATTCAGTACGCTTGTGCAAG	24	GAAGGTCGGAGTCAACGGATTGTAGATTCAGTACGCTTGTGCAAG	TCCGCCACTACATGTTTTGTATTCTTGAA	29
AT018		1	9413422	T	G	ATATAGGTGATTGGAGGATCGGGTT	25	GAAGGTGACCAAGTTCATGCTATATAGGTGATTGGAGGATCGGGTT	AGGTGATTGGAGGATCGGGTG	21	GAAGGTCGGAGTCAACGGATTAGGTGATTGGAGGATCGGGTG	GTAACAGCAACTTGTACCAGATTTCATTAA	30
AT019		1	9600403	G	A	TTCTTCAGGGTAAACGTACAGCG	23	GAAGGTGACCAAGTTCATGCTTTCTTCAGGGTAAACGTACAGCG	CTTTCTTCAGGGTAAACGTACAGCA	25	GAAGGTCGGAGTCAACGGATTCTTTCTTCAGGGTAAACGTACAGCA	TTTACTTTCTTTCCATAGCTTCTGCTCTTT	30
AT020		1	10542882	A	C	AGACTATCAAAGTCAAAAGTTTTGAACAAA	30	GAAGGTGACCAAGTTCATGCTAGACTATCAAAGTCAAAAGTTTTGAACAAA	AGACTATCAAAGTCAAAAGTTTTGAACAAC	30	GAAGGTCGGAGTCAACGGATTAGACTATCAAAGTCAAAAGTTTTGAACAAC	GACTGAATGTGCCAGAAGAATCAATGTAA	29
AT021		1	11328845	T	G	ATTCCTTTTTTATCATTTGTTTTTTCTTGTAT	32	GAAGGTGACCAAGTTCATGCTATTCCTTTTTTATCATTTGTTTTTTCTTGTAT	ATTCCTTTTTTATCATTTGTTTTTTCTTGTAG	32	GAAGGTCGGAGTCAACGGATTATTCCTTTTTTATCATTTGTTTTTTCTTGTAG	CAAGCAAATGGTATCACTAGACACGTTAT	29
AT022		1	11724586	G	A	CAATGGTTAAAAGAAAACTATAAATGGAAACG	32	GAAGGTGACCAAGTTCATGCTCAATGGTTAAAAGAAAACTATAAATGGAAACG	ACAATGGTTAAAAGAAAACTATAAATGGAAACA	33	GAAGGTCGGAGTCAACGGATTACAATGGTTAAAAGAAAACTATAAATGGAAACA	TGGTGGCGGTTTGGAACCACTTTTA	25
AT023	AIGI	1	12347141	T	C	ATATGTCATCAGTATGTAACTAATGTGGAT	30	GAAGGTGACCAAGTTCATGCTATATGTCATCAGTATGTAACTAATGTGGAT	GTCATCAGTATGTAACTAATGTGGAC	26	GAAGGTCGGAGTCAACGGATTGTCATCAGTATGTAACTAATGTGGAC	ACCGACAAATCAAATAGACCTGTAACCAA	29
AT024	GAPB_2	1	16128557	G	A	GGACCTAATAATGTTAGCGACATCG	25	GAAGGTGACCAAGTTCATGCTGGACCTAATAATGTTAGCGACATCG	CGGACCTAATAATGTTAGCGACATCA	26	GAAGGTCGGAGTCAACGGATTCGGACCTAATAATGTTAGCGACATCA	ATGTTATGGGAGTCAATGAGCAAGACTAT	29
AT025		1	19748693	T	C	AAACCAAACCTAAGTAAAACAGATGTCAT	29	GAAGGTGACCAAGTTCATGCTAAACCAAACCTAAGTAAAACAGATGTCAT	ACCAAACCTAAGTAAAACAGATGTCAC	27	GAAGGTCGGAGTCAACGGATTACCAAACCTAAGTAAAACAGATGTCAC	CTACAAAACAATTGATAGGAAATCGATCAA	30
AT026		1	19996564	T	A	ATCATAGAAAAGGATACGATGGAGTCT	27	GAAGGTGACCAAGTTCATGCTATCATAGAAAAGGATACGATGGAGTCT	ATCATAGAAAAGGATACGATGGAGTCA	27	GAAGGTCGGAGTCAACGGATTATCATAGAAAAGGATACGATGGAGTCA	AGATGAACCAGAGTAACAGCAACACAA	27
AT027		1	20599696	A	T	AAATACTGTATAGACTATCTACAGTTTTCAAAA	33	GAAGGTGACCAAGTTCATGCTAAATACTGTATAGACTATCTACAGTTTTCAAAA	AAATACTGTATAGACTATCTACAGTTTTCAAAT	33	GAAGGTCGGAGTCAACGGATTAAATACTGTATAGACTATCTACAGTTTTCAAAT	GCTCCATTCCGTACGTTAATACAAAGATT	29
AT028		1	22327901	C	G	CAGAATCATGCTATATAGGTTTAATGGC	28	GAAGGTGACCAAGTTCATGCTCAGAATCATGCTATATAGGTTTAATGGC	CAGAATCATGCTATATAGGTTTAATGGG	28	GAAGGTCGGAGTCAACGGATTCAGAATCATGCTATATAGGTTTAATGGG	GAAAACTTGGTCGAGTCTTTCTTTGCTTT	29
AT029	M305	1	23821083	T	C	TGCCACTGGAACTGTAACATACATT	25	GAAGGTGACCAAGTTCATGCTTGCCACTGGAACTGTAACATACATT	GCCACTGGAACTGTAACATACATC	24	GAAGGTCGGAGTCAACGGATTGCCACTGGAACTGTAACATACATC	CGGCTAATAACACAATGTTCCTTTCCAAA	29
AT030		1	26746175	A	T	CAAAGAAAAGATAAATAAAAGATTGGAAGATGA	33	GAAGGTGACCAAGTTCATGCTCAAAGAAAAGATAAATAAAAGATTGGAAGATGA	CAAAGAAAAGATAAATAAAAGATTGGAAGATGT	33	GAAGGTCGGAGTCAACGGATTCAAAGAAAAGATAAATAAAAGATTGGAAGATGT	GTTACCCGAACCTAATCAAAGAACACAAA	29
AT031		1	27947969	T	A	AGATCAGTAACTGCCATATGGAGAAT	26	GAAGGTGACCAAGTTCATGCTAGATCAGTAACTGCCATATGGAGAAT	AGATCAGTAACTGCCATATGGAGAAA	26	GAAGGTCGGAGTCAACGGATTAGATCAGTAACTGCCATATGGAGAAA	GATTTAGATGAATGATGCATTTCACGAATA	30
AT032		1	28899030	G	A	TCTTTCTTTTCCATTCATTTGAATTTGGG	29	GAAGGTGACCAAGTTCATGCTTCTTTCTTTTCCATTCATTTGAATTTGGG	GTTCTTTCTTTTCCATTCATTTGAATTTGGA	31	GAAGGTCGGAGTCAACGGATTGTTCTTTCTTTTCCATTCATTTGAATTTGGA	CAACTAACTATTAGCTACGTGTTGTTGATT	30
AT033	ADH	1	28975601	G	A	ATTTATTGATCGGTTACATTTCTGTTGAG	29	GAAGGTGACCAAGTTCATGCTATTTATTGATCGGTTACATTTCTGTTGAG	AAATATTTATTGATCGGTTACATTTCTGTTGAA	33	GAAGGTCGGAGTCAACGGATTAAATATTTATTGATCGGTTACATTTCTGTTGAA	TCAACATAGAAATTGTGGATTCATAACAAA	30
AT034		1	29393153	A	G	GATCCGGAATCTGGAGGTGGAA	22	GAAGGTGACCAAGTTCATGCTGATCCGGAATCTGGAGGTGGAA	ATCCGGAATCTGGAGGTGGAG	21	GAAGGTCGGAGTCAACGGATTATCCGGAATCTGGAGGTGGAG	CGGCGCCTTTCTCAAGCTTGACAT	24
AT035	K1_30413706	1	30413706	C	G	TTTGAGATGAACGCTACAAACGAATAAC	28	GAAGGTGACCAAGTTCATGCTTTTGAGATGAACGCTACAAACGAATAAC	TTTGAGATGAACGCTACAAACGAATAAG	28	GAAGGTCGGAGTCAACGGATTTTTGAGATGAACGCTACAAACGAATAAG	GTTCTTGAAACAATCTTTGTATCTCATCA	29
AT036		2	68457	C	G	GCATGCCCATGAGGCTAGTTTC	22	GAAGGTGACCAAGTTCATGCTGCATGCCCATGAGGCTAGTTTC	GCATGCCCATGAGGCTAGTTTG	22	GAAGGTCGGAGTCAACGGATTGCATGCCCATGAGGCTAGTTTG	CCGCTGGAACCGCTGAGACAAA	22
AT037		2	172469	A	C	CATCTATAACATCCTCAAGTACTCCAA	27	GAAGGTGACCAAGTTCATGCTCATCTATAACATCCTCAAGTACTCCAA	ATCTATAACATCCTCAAGTACTCCAC	26	GAAGGTCGGAGTCAACGGATTATCTATAACATCCTCAAGTACTCCAC	GACGCCGAGATGTGGAAGCTGTT	23
AT038		2	1834582	A	T	ACTAAGATACTTCTTGAAGAATTCAAAAA	29	GAAGGTGACCAAGTTCATGCTACTAAGATACTTCTTGAAGAATTCAAAAA	GCTACTAAGATACTTCTTGAAGAATTCAAAAT	32	GAAGGTCGGAGTCAACGGATTGCTACTAAGATACTTCTTGAAGAATTCAAAAT	GGTAGAGTAAGTATGAAGCCTAAATTTCTT	30
AT039		2	2213717	G	A	TATAAGTAATGGAAGGAAAACACTACAAG	29	GAAGGTGACCAAGTTCATGCTTATAAGTAATGGAAGGAAAACACTACAAG	ATAAGTAATGGAAGGAAAACACTACAAA	28	GAAGGTCGGAGTCAACGGATTATAAGTAATGGAAGGAAAACACTACAAA	GAACATTGAATCATTCAGTGATACAAGCAA	30
AT040		2	3994520	T	G	CGAACACAACGTAGTGTTTCCTCTT	25	GAAGGTGACCAAGTTCATGCTCGAACACAACGTAGTGTTTCCTCTT	GAACACAACGTAGTGTTTCCTCTG	24	GAAGGTCGGAGTCAACGGATTGAACACAACGTAGTGTTTCCTCTG	GAAAAATTTGATTAAAGCAGGTCCGGTATT	30
AT041		2	6308851	C	T	CAAATTCTATCATATCATCTTTGATCATTTTC	32	GAAGGTGACCAAGTTCATGCTCAAATTCTATCATATCATCTTTGATCATTTTC	CAAATTCTATCATATCATCTTTGATCATTTTT	32	GAAGGTCGGAGTCAACGGATTCAAATTCTATCATATCATCTTTGATCATTTTT	CCACAACAAAGAACAAATTCGAAGGACAA	29
AT042		2	7329098	T	G	ATCCATGAATACACATATCCATACTTTGT	29	GAAGGTGACCAAGTTCATGCTATCCATGAATACACATATCCATACTTTGT	CCATGAATACACATATCCATACTTTGG	27	GAAGGTCGGAGTCAACGGATTCCATGAATACACATATCCATACTTTGG	CGAGAGGTAATATGAAGAAATTACAACCTT	30
AT043		2	7994335	G	C	GTCCTTAAAAACTCTGTCGCTGTTTG	26	GAAGGTGACCAAGTTCATGCTGTCCTTAAAAACTCTGTCGCTGTTTG	GTCCTTAAAAACTCTGTCGCTGTTTC	26	GAAGGTCGGAGTCAACGGATTGTCCTTAAAAACTCTGTCGCTGTTTC	CCACAATTACTCTCATAAAAGTAAAGTATT	30
AT044		2	8314974	A	T	ACTGAAGCTAGCATGTGCCGAA	22	GAAGGTGACCAAGTTCATGCTACTGAAGCTAGCATGTGCCGAA	ACTGAAGCTAGCATGTGCCGAT	22	GAAGGTCGGAGTCAACGGATTACTGAAGCTAGCATGTGCCGAT	TCCCAAAGTAAGAGACCACAATTCTGATT	29
AT045		2	9088650	G	A	GAGTGCAATTTTTAGGTAAAGTACACG	27	GAAGGTGACCAAGTTCATGCTGAGTGCAATTTTTAGGTAAAGTACACG	ATAGAGTGCAATTTTTAGGTAAAGTACACA	30	GAAGGTCGGAGTCAACGGATTATAGAGTGCAATTTTTAGGTAAAGTACACA	GTATCATTTGCTAACAACTAGATTTCATAT	30
AT046		2	9903034	A	T	GTTGCTTCTTGTTCTTGGTCTTCCA	25	GAAGGTGACCAAGTTCATGCTGTTGCTTCTTGTTCTTGGTCTTCCA	GTTGCTTCTTGTTCTTGGTCTTCCT	25	GAAGGTCGGAGTCAACGGATTGTTGCTTCTTGTTCTTGGTCTTCCT	CTCGTTGATGGCTTTATATGTTCGCAAAT	29
AT047		2	11991100	G	C	GCCAGTTCTCAGCCAATACCAG	22	GAAGGTGACCAAGTTCATGCTGCCAGTTCTCAGCCAATACCAG	GCCAGTTCTCAGCCAATACCAC	22	GAAGGTCGGAGTCAACGGATTGCCAGTTCTCAGCCAATACCAC	GGAGAGAAGTTGTAACCTTTTCAAAATGTA	30
AT048		2	12277571	T	A	AAATACATAATGGTAAATGGTGGACTTTCT	30	GAAGGTGACCAAGTTCATGCTAAATACATAATGGTAAATGGTGGACTTTCT	AAATACATAATGGTAAATGGTGGACTTTCA	30	GAAGGTCGGAGTCAACGGATTAAATACATAATGGTAAATGGTGGACTTTCA	GTCCACCATTTAACATTTACCATTTACCAA	30
AT049		2	12656716	C	A	TTGATAACATCCCAAAATCATCAAC	25	GAAGGTGACCAAGTTCATGCTTTGATAACATCCCAAAATCATCAAC	GGCTTTGATAACATCCCAAAATCATCAAA	29	GAAGGTCGGAGTCAACGGATTGGCTTTGATAACATCCCAAAATCATCAAA	CCTAACCTCGTTTATAGTGAGTCTAGAAT	29
AT050		2	13051395	A	T	GTAAATTATCATTGAGATCCTGAGAAACTAA	31	GAAGGTGACCAAGTTCATGCTGTAAATTATCATTGAGATCCTGAGAAACTAA	GTAAATTATCATTGAGATCCTGAGAAACTAT	31	GAAGGTCGGAGTCAACGGATTGTAAATTATCATTGAGATCCTGAGAAACTAT	GGGAACTTCAGAGAATGATAAACTTGCTT	29
AT051		2	13429418	T	A	CATACCTTTTAACATCAACCCGGCT	25	GAAGGTGACCAAGTTCATGCTCATACCTTTTAACATCAACCCGGCT	CATACCTTTTAACATCAACCCGGCA	25	GAAGGTCGGAGTCAACGGATTCATACCTTTTAACATCAACCCGGCA	ATATGTGGTTGTGAGAACAGGTTGCATT	28
AT052		2	13806890	T	A	ATGTTCAAGAGAAACCAGTCTATCCAT	27	GAAGGTGACCAAGTTCATGCTATGTTCAAGAGAAACCAGTCTATCCAT	ATGTTCAAGAGAAACCAGTCTATCCAA	27	GAAGGTCGGAGTCAACGGATTATGTTCAAGAGAAACCAGTCTATCCAA	TTTCGGCGATGTTATGCTTTGCTTGTAA	28
AT053		2	14185132	A	G	AATAGGTGTTGAGAAATGAATAAGAAGA	28	GAAGGTGACCAAGTTCATGCTAATAGGTGTTGAGAAATGAATAAGAAGA	AATAGGTGTTGAGAAATGAATAAGAAGG	28	GAAGGTCGGAGTCAACGGATTAATAGGTGTTGAGAAATGAATAAGAAGG	GATGCAGCGGCTTTGTGATGAGAAA	25
AT054		2	15334516	C	A	TTACCAACCCGACATTTTCGAGAC	24	GAAGGTGACCAAGTTCATGCTTTACCAACCCGACATTTTCGAGAC	TTTACCAACCCGACATTTTCGAGAA	25	GAAGGTCGGAGTCAACGGATTTTTACCAACCCGACATTTTCGAGAA	GCCAATTGCGCATTTCTTTCCTCCTT	26
AT055		2	15493536	A	C	GTTTGAACGTAGGAAGAGACTGGA	24	GAAGGTGACCAAGTTCATGCTGTTTGAACGTAGGAAGAGACTGGA	TGAACGTAGGAAGAGACTGGC	21	GAAGGTCGGAGTCAACGGATTTGAACGTAGGAAGAGACTGGC	GAGATTAGTGAACTCAATCTATTAGACTAT	30
AT056		2	16472077	A	G	TAATTCATGCAGCTTGCATTATACACA	27	GAAGGTGACCAAGTTCATGCTTAATTCATGCAGCTTGCATTATACACA	AATTCATGCAGCTTGCATTATACACG	26	GAAGGTCGGAGTCAACGGATTAATTCATGCAGCTTGCATTATACACG	AGACCGTCATTGACCATGTCCGTAT	25
AT057		2	16851187	C	A	TAACCAATGCAGTTATTGGACTTAAC	26	GAAGGTGACCAAGTTCATGCTTAACCAATGCAGTTATTGGACTTAAC	AACTTAACCAATGCAGTTATTGGACTTAAA	30	GAAGGTCGGAGTCAACGGATTAACTTAACCAATGCAGTTATTGGACTTAAA	TGAGATCTCTAACTTCTCGCATTTCCAAA	29
AT058		2	18753024	A	T	TGGACCTCAGAATCTAGAGAAGTTTA	26	GAAGGTGACCAAGTTCATGCTTGGACCTCAGAATCTAGAGAAGTTTA	GGACCTCAGAATCTAGAGAAGTTTT	25	GAAGGTCGGAGTCAACGGATTGGACCTCAGAATCTAGAGAAGTTTT	CACAACAATACCCCAAACTTTACAACTGTT	30
AT059		2	18853469	A	G	CATCTCCGGCGAATTCACTGTGA	23	GAAGGTGACCAAGTTCATGCTCATCTCCGGCGAATTCACTGTGA	ATCTCCGGCGAATTCACTGTGG	22	GAAGGTCGGAGTCAACGGATTATCTCCGGCGAATTCACTGTGG	GCAGGCCAGAGCCAAGTGGAAA	22
AT060		2	19228809	T	C	AAAACATCCAAAAAATTCGAAAAAAGGAAAGAT	33	GAAGGTGACCAAGTTCATGCTAAAACATCCAAAAAATTCGAAAAAAGGAAAGAT	ACATCCAAAAAATTCGAAAAAAGGAAAGAC	30	GAAGGTCGGAGTCAACGGATTACATCCAAAAAATTCGAAAAAAGGAAAGAC	TTGACTTTGTGGCACAATCTTCTAAATTCT	30
AT061		2	19694139	C	T	GATACTTTTGCAGTTGAAGAATCTAAATTC	30	GAAGGTGACCAAGTTCATGCTGATACTTTTGCAGTTGAAGAATCTAAATTC	ATGATACTTTTGCAGTTGAAGAATCTAAATTT	32	GAAGGTCGGAGTCAACGGATTATGATACTTTTGCAGTTGAAGAATCTAAATTT	ATTGACCATGTCCCCTGAGAGCTTA	25
AT062	K2_19694547	2	19694547	G	A	AATTTAGCCCCTTGTTGAGGTCATAG	26	GAAGGTGACCAAGTTCATGCTAATTTAGCCCCTTGTTGAGGTCATAG	AATTTAGCCCCTTGTTGAGGTCATAA	26	GAAGGTCGGAGTCAACGGATTAATTTAGCCCCTTGTTGAGGTCATAA	CTGGTTCCAAAGTCGAACAAATTGA	25
AT063	K3_00000511	3	511	A	G	TTGAAGCGACATTTTTTTGTGGA	23	GAAGGTGACCAAGTTCATGCTTTGAAGCGACATTTTTTTGTGGA	TTGAAGCGACATTTTTTTGTGGG	23	GAAGGTCGGAGTCAACGGATTTTGAAGCGACATTTTTTTGTGGG	GCACCGTAGATATTACTCATCCGGAAC	27
AT064		3	580137	G	C	AGGTCTGCCTTTGTAAACTGCAAAG	25	GAAGGTGACCAAGTTCATGCTAGGTCTGCCTTTGTAAACTGCAAAG	AGGTCTGCCTTTGTAAACTGCAAAC	25	GAAGGTCGGAGTCAACGGATTAGGTCTGCCTTTGTAAACTGCAAAC	CTTCGTGGCCGCGTTTCGGTTA	22
AT065		3	953374	G	T	GCACTAACCAGAACTGAATCACAG	24	GAAGGTGACCAAGTTCATGCTGCACTAACCAGAACTGAATCACAG	GGCACTAACCAGAACTGAATCACAT	25	GAAGGTCGGAGTCAACGGATTGGCACTAACCAGAACTGAATCACAT	GTTAAAGGCCAAAGTATTAGTAGCAAACTA	30
AT066		3	1541067	T	C	GAATGCAAAGTTATGTAGGTTTTACAACATT	31	GAAGGTGACCAAGTTCATGCTGAATGCAAAGTTATGTAGGTTTTACAACATT	AATGCAAAGTTATGTAGGTTTTACAACATC	30	GAAGGTCGGAGTCAACGGATTAATGCAAAGTTATGTAGGTTTTACAACATC	GTGGCAAGTTTCTTTTCCAAGCTTTAGTT	29
AT067		3	1920365	G	A	GACAAATACTGGTTAAGTTTCAAGTCTG	28	GAAGGTGACCAAGTTCATGCTGACAAATACTGGTTAAGTTTCAAGTCTG	AGACAAATACTGGTTAAGTTTCAAGTCTA	29	GAAGGTCGGAGTCAACGGATTAGACAAATACTGGTTAAGTTTCAAGTCTA	GCTCTTACGTTTCTGTTTTTGTTTTAGGTT	30
AT068		3	2326438	A	G	AAACTCACAGGTAATTCCAGCAACAAA	27	GAAGGTGACCAAGTTCATGCTAAACTCACAGGTAATTCCAGCAACAAA	ACTCACAGGTAATTCCAGCAACAAG	25	GAAGGTCGGAGTCAACGGATTACTCACAGGTAATTCCAGCAACAAG	AAGCAAACCCTATTTTACTGGTTCCTGTA	29
AT069		3	2711231	A	G	CGCGGAAGACGTTTTCTCGTCA	22	GAAGGTGACCAAGTTCATGCTCGCGGAAGACGTTTTCTCGTCA	GCGGAAGACGTTTTCTCGTCG	21	GAAGGTCGGAGTCAACGGATTGCGGAAGACGTTTTCTCGTCG	CAGCTTTCCTCGGTGGAACAACATT	25
AT070		3	3914776	A	T	ATGACATATAGTTAAACCCTTTGAATCACA	30	GAAGGTGACCAAGTTCATGCTATGACATATAGTTAAACCCTTTGAATCACA	ATGACATATAGTTAAACCCTTTGAATCACT	30	GAAGGTCGGAGTCAACGGATTATGACATATAGTTAAACCCTTTGAATCACT	CTACGGAGTGGCCAAGGTGAGTA	23
AT071		3	4000301	T	G	AATGCCTAATGCTAGCCTTTCTAAGT	26	GAAGGTGACCAAGTTCATGCTAATGCCTAATGCTAGCCTTTCTAAGT	ATGCCTAATGCTAGCCTTTCTAAGG	25	GAAGGTCGGAGTCAACGGATTATGCCTAATGCTAGCCTTTCTAAGG	GGTCGTATGGAGTTTATTCAATTGCAGTT	29
AT072		3	4293485	A	T	CCATACTATCAAGCTTATTAATGGCAAAA	29	GAAGGTGACCAAGTTCATGCTCCATACTATCAAGCTTATTAATGGCAAAA	CCATACTATCAAGCTTATTAATGGCAAAT	29	GAAGGTCGGAGTCAACGGATTCCATACTATCAAGCTTATTAATGGCAAAT	CCGAGAGTATATCATGCACCACCAT	25
AT073		3	4481629	T	G	ATTAATCTTCGAAGGTGTTGAAGTAACTT	29	GAAGGTGACCAAGTTCATGCTATTAATCTTCGAAGGTGTTGAAGTAACTT	AATCTTCGAAGGTGTTGAAGTAACTG	26	GAAGGTCGGAGTCAACGGATTAATCTTCGAAGGTGTTGAAGTAACTG	CACCTGAGTTTCACAATCGTGTCCAA	26
AT074		3	7192423	C	T	CGAATAGCAAAGAATACGAGCAAATTC	27	GAAGGTGACCAAGTTCATGCTCGAATAGCAAAGAATACGAGCAAATTC	AACGAATAGCAAAGAATACGAGCAAATTT	29	GAAGGTCGGAGTCAACGGATTAACGAATAGCAAAGAATACGAGCAAATTT	CCATTAAGAAGCTCTTTTCCGATTTTTGTT	30
AT075		3	7757120	A	G	TGATGTTGTTTGGGTTGTGCATAGA	25	GAAGGTGACCAAGTTCATGCTTGATGTTGTTTGGGTTGTGCATAGA	GATGTTGTTTGGGTTGTGCATAGG	24	GAAGGTCGGAGTCAACGGATTGATGTTGTTTGGGTTGTGCATAGG	CCTCCAACGAAGATGGATTACGAGAA	26
AT076		3	8000279	G	T	GAAATTTTGTGCTTCTTATATCTACTAACG	30	GAAGGTGACCAAGTTCATGCTGAAATTTTGTGCTTCTTATATCTACTAACG	GAAATTTTGTGCTTCTTATATCTACTAACT	30	GAAGGTCGGAGTCAACGGATTGAAATTTTGTGCTTCTTATATCTACTAACT	CGTTATGAAACATTGAGACCTAATGTGAGA	30
AT077		3	12651732	T	C	CGGTTGGATTGCACCAAATGTAGT	24	GAAGGTGACCAAGTTCATGCTCGGTTGGATTGCACCAAATGTAGT	GGTTGGATTGCACCAAATGTAGC	23	GAAGGTCGGAGTCAACGGATTGGTTGGATTGCACCAAATGTAGC	ATATCCCTTCTACTTCATTCACTCGACTT	29
AT078		3	13491841	A	C	GACTGCCAGAATATGGAGGCAA	22	GAAGGTGACCAAGTTCATGCTGACTGCCAGAATATGGAGGCAA	GACTGCCAGAATATGGAGGCAC	22	GAAGGTCGGAGTCAACGGATTGACTGCCAGAATATGGAGGCAC	CACACCAAGGACCTATTCTGTGACT	25
AT079		3	15990167	G	A	CCAAATACGAACTTACTTAACCGCG	25	GAAGGTGACCAAGTTCATGCTCCAAATACGAACTTACTTAACCGCG	CCCAAATACGAACTTACTTAACCGCA	26	GAAGGTCGGAGTCAACGGATTCCCAAATACGAACTTACTTAACCGCA	TCTGGTGTGTGACCCTTTTGGCTAT	25
AT080		3	17690457	T	C	ATATATTGCGAAGAACGAATGTGGGAT	27	GAAGGTGACCAAGTTCATGCTATATATTGCGAAGAACGAATGTGGGAT	ATATTGCGAAGAACGAATGTGGGAC	25	GAAGGTCGGAGTCAACGGATTATATTGCGAAGAACGAATGTGGGAC	ATAATTATATGCAATCTCACTTCCTCTAAA	30
AT081		3	18717244	G	A	GCAGTTTCACATTAGCTTGACTAGAG	26	GAAGGTGACCAAGTTCATGCTGCAGTTTCACATTAGCTTGACTAGAG	GCAGTTTCACATTAGCTTGACTAGAA	26	GAAGGTCGGAGTCAACGGATTGCAGTTTCACATTAGCTTGACTAGAA	CCTCCACAATCCAAATCTGAATGGTATAA	29
AT082		3	19099396	T	A	ATAAAAGATTTAATTCTCTTTTATATTCAAACT	33	GAAGGTGACCAAGTTCATGCTATAAAAGATTTAATTCTCTTTTATATTCAAACT	ATAAAAGATTTAATTCTCTTTTATATTCAAACA	33	GAAGGTCGGAGTCAACGGATTATAAAAGATTTAATTCTCTTTTATATTCAAACA	CCACGTGTGCTTCCAATCTCCATA	24
AT083		3	19671796	C	A	ATCATAAATATGATCAACAACTACTTGATAAAC	33	GAAGGTGACCAAGTTCATGCTATCATAAATATGATCAACAACTACTTGATAAAC	ATCATAAATATGATCAACAACTACTTGATAAAA	33	GAAGGTCGGAGTCAACGGATTATCATAAATATGATCAACAACTACTTGATAAAA	GGCACTTAGATTCGTTGTTTCCGGTA	26
AT084		3	20251238	C	T	GAATATTCGAAATTATTACTTAAAAACGACTTC	33	GAAGGTGACCAAGTTCATGCTGAATATTCGAAATTATTACTTAAAAACGACTTC	GAATATTCGAAATTATTACTTAAAAACGACTTT	33	GAAGGTCGGAGTCAACGGATTGAATATTCGAAATTATTACTTAAAAACGACTTT	GTCTATTCGAATTCTTAAGACTTACGGTTA	30
AT085		3	20428680	A	G	AATCGCAGAGAGTGGCAGTATCA	23	GAAGGTGACCAAGTTCATGCTAATCGCAGAGAGTGGCAGTATCA	ATCGCAGAGAGTGGCAGTATCG	22	GAAGGTCGGAGTCAACGGATTATCGCAGAGAGTGGCAGTATCG	GAGAACTCTGTGACTTGGCTGATGTA	26
AT086		3	23355831	A	G	AATATTTTATAAACAGTTTGTGGATAAAAAACA	33	GAAGGTGACCAAGTTCATGCTAATATTTTATAAACAGTTTGTGGATAAAAAACA	AATATTTTATAAACAGTTTGTGGATAAAAAACG	33	GAAGGTCGGAGTCAACGGATTAATATTTTATAAACAGTTTGTGGATAAAAAACG	TGTGGACCCCCCTCTGATTACATT	24
AT087		3	23443472	G	A	GTGCTCAAATGTTTAGATCTAAAATCCAG	29	GAAGGTGACCAAGTTCATGCTGTGCTCAAATGTTTAGATCTAAAATCCAG	GTGCTCAAATGTTTAGATCTAAAATCCAA	29	GAAGGTCGGAGTCAACGGATTGTGCTCAAATGTTTAGATCTAAAATCCAA	CCATCATGAGAGGTACTAATTGATTCCTT	29
AT088	K3_23456808	3	23456808	T	G	GAGTTCCTGAGACAACCCCCT	21	GAAGGTGACCAAGTTCATGCTGAGTTCCTGAGACAACCCCCT	GAGTTCCTGAGACAACCCCCG	21	GAAGGTCGGAGTCAACGGATTGAGTTCCTGAGACAACCCCCG	AGGAATTAGTAGAGCTGGGGGAAGC	25
AT089	K4_00001470	4	1470	T	G	GTGGGCGGGAAGAGAGAAACTGAT	24	GAAGGTGACCAAGTTCATGCTGTGGGCGGGAAGAGAGAAACTGAT	GTGGGCGGGAAGAGAGAAACTGAG	24	GAAGGTCGGAGTCAACGGATTGTGGGCGGGAAGAGAGAAACTGAG	ATTTCAGGGTGAATTACGTCTGCAT	25
AT090		4	11690	T	A	GGGGAAGGTGTTAAAATCTCT	21	GAAGGTGACCAAGTTCATGCTGGGGAAGGTGTTAAAATCTCT	GCTGGGGAAGGTGTTAAAATCTCA	24	GAAGGTCGGAGTCAACGGATTGCTGGGGAAGGTGTTAAAATCTCA	AAAGACAAGGCAGAGAAGGAATGGAAATA	29
AT091		4	641363	G	C	AGTTTGTTTGGTTACTATTGTCTTGGG	27	GAAGGTGACCAAGTTCATGCTAGTTTGTTTGGTTACTATTGTCTTGGG	AGTTTGTTTGGTTACTATTGTCTTGGC	27	GAAGGTCGGAGTCAACGGATTAGTTTGTTTGGTTACTATTGTCTTGGC	CTGAAATTGTCCTTCCATAGCTTCTCTTT	29
AT092		4	1731719	A	G	GTACGATAAAGCCTCGCAAACTA	23	GAAGGTGACCAAGTTCATGCTGTACGATAAAGCCTCGCAAACTA	GTACGATAAAGCCTCGCAAACTG	23	GAAGGTCGGAGTCAACGGATTGTACGATAAAGCCTCGCAAACTG	GCTACAGAAAGTTTGTACGCCGCAA	25
AT093		4	2123876	A	G	CAGTTCTTGTACCGGTTAATTGGACA	26	GAAGGTGACCAAGTTCATGCTCAGTTCTTGTACCGGTTAATTGGACA	AGTTCTTGTACCGGTTAATTGGACG	25	GAAGGTCGGAGTCAACGGATTAGTTCTTGTACCGGTTAATTGGACG	TTTGTCAATATCACTTGAAGTCACATTCTT	30
AT094		4	2539053	G	C	TGAAGCAACTTGGTTTGCCCTG	22	GAAGGTGACCAAGTTCATGCTTGAAGCAACTTGGTTTGCCCTG	GAAGCAACTTGGTTTGCCCTC	21	GAAGGTCGGAGTCAACGGATTGAAGCAACTTGGTTTGCCCTC	CCCTAAATGTGAGGATTATCTCATTCCAA	29
AT095		4	4040382	T	G	GGAGGCGAGGTCGAGTGATTTTT	23	GAAGGTGACCAAGTTCATGCTGGAGGCGAGGTCGAGTGATTTTT	GAGGCGAGGTCGAGTGATTTTG	22	GAAGGTCGGAGTCAACGGATTGAGGCGAGGTCGAGTGATTTTG	CGACCATCGCTTCTCTCTCATCTAT	25
AT096		4	4058015	G	C	ATTTTCTCTTAGAAGAGACTAAAACCAAG	29	GAAGGTGACCAAGTTCATGCTATTTTCTCTTAGAAGAGACTAAAACCAAG	TTCTCTTAGAAGAGACTAAAACCAAC	26	GAAGGTCGGAGTCAACGGATTTTCTCTTAGAAGAGACTAAAACCAAC	GAAAGCTATTTACAGCTTCTAAGCAATTTT	30
AT097		4	4777458	T	A	CCTTGTTCTTCACGTGTGCTCCT	23	GAAGGTGACCAAGTTCATGCTCCTTGTTCTTCACGTGTGCTCCT	CCTTGTTCTTCACGTGTGCTCCA	23	GAAGGTCGGAGTCAACGGATTCCTTGTTCTTCACGTGTGCTCCA	CTCGGCCTATGTACTCGGCCTA	22
AT098		4	6177225	C	T	CCGGAAACAGAGCCTCTCTTC	21	GAAGGTGACCAAGTTCATGCTCCGGAAACAGAGCCTCTCTTC	GCCGGAAACAGAGCCTCTCTTT	22	GAAGGTCGGAGTCAACGGATTGCCGGAAACAGAGCCTCTCTTT	GGAGAAGAAGAAAATACGGCGGTGAA	26
AT099		4	8001301	T	G	GACCAAACTCTCATGTCCCATCTT	24	GAAGGTGACCAAGTTCATGCTGACCAAACTCTCATGTCCCATCTT	ACCAAACTCTCATGTCCCATCTG	23	GAAGGTCGGAGTCAACGGATTACCAAACTCTCATGTCCCATCTG	TCATTTTCCGTAGCGTGGATGTGATTTAA	29
AT100		4	8587473	A	G	AGAAAATGTTAATTCTATCACATGATATTTTAA	33	GAAGGTGACCAAGTTCATGCTAGAAAATGTTAATTCTATCACATGATATTTTAA	AGAAAATGTTAATTCTATCACATGATATTTTAG	33	GAAGGTCGGAGTCAACGGATTAGAAAATGTTAATTCTATCACATGATATTTTAG	TGGACTACCCCCTGGTATAAATTTGATTA	29
AT101		4	9783886	C	T	GAAAATGGAATACATGAGTACTACTTTATC	30	GAAGGTGACCAAGTTCATGCTGAAAATGGAATACATGAGTACTACTTTATC	CAGAAAATGGAATACATGAGTACTACTTTATT	32	GAAGGTCGGAGTCAACGGATTCAGAAAATGGAATACATGAGTACTACTTTATT	AGGTATTCTTTTCTAGTTTGGACAACTCTT	30
AT102		4	10033699	A	T	GAGTACAGTCTGTGTACAAAGCTATTA	27	GAAGGTGACCAAGTTCATGCTGAGTACAGTCTGTGTACAAAGCTATTA	GAGTACAGTCTGTGTACAAAGCTATTT	27	GAAGGTCGGAGTCAACGGATTGAGTACAGTCTGTGTACAAAGCTATTT	GACTACACTTGTACCCGTATCGTCTT	26
AT103		4	11284102	G	A	ATTTAATTTTCCAATCAACTGTAAAGTTTTGTG	33	GAAGGTGACCAAGTTCATGCTATTTAATTTTCCAATCAACTGTAAAGTTTTGTG	TAATTTTCCAATCAACTGTAAAGTTTTGTA	30	GAAGGTCGGAGTCAACGGATTTAATTTTCCAATCAACTGTAAAGTTTTGTA	TAACATGGCAATGGCAACGTTACAACTTT	29
AT104		4	11999130	A	G	CCTAGTACATAGTTAAAAAGAAGTATACACTA	32	GAAGGTGACCAAGTTCATGCTCCTAGTACATAGTTAAAAAGAAGTATACACTA	CTAGTACATAGTTAAAAAGAAGTATACACTG	31	GAAGGTCGGAGTCAACGGATTCTAGTACATAGTTAAAAAGAAGTATACACTG	ACTTTTCAAATAGGGTGACTGTCATGGTA	29
AT105		4	14177230	G	T	AGGCGCGTCATAAAAGGAGGAG	22	GAAGGTGACCAAGTTCATGCTAGGCGCGTCATAAAAGGAGGAG	AAAGGCGCGTCATAAAAGGAGGAT	24	GAAGGTCGGAGTCAACGGATTAAAGGCGCGTCATAAAAGGAGGAT	GCTTTAAAACTCTTATGTTAAGCGTCTGAT	30
AT106		4	15777382	G	A	TTGGAGGAAATAAATTCTTTCAGTTGTG	28	GAAGGTGACCAAGTTCATGCTTTGGAGGAAATAAATTCTTTCAGTTGTG	CTTTGGAGGAAATAAATTCTTTCAGTTGTA	30	GAAGGTCGGAGTCAACGGATTCTTTGGAGGAAATAAATTCTTTCAGTTGTA	TGTCTTTGGTCTGCAAACCAACAAGAAA	28
AT107		4	16952959	A	C	GAATCAGAATATCTTATGTGATTAGAATCTTTA	33	GAAGGTGACCAAGTTCATGCTGAATCAGAATATCTTATGTGATTAGAATCTTTA	AATCAGAATATCTTATGTGATTAGAATCTTTC	32	GAAGGTCGGAGTCAACGGATTAATCAGAATATCTTATGTGATTAGAATCTTTC	CAACTTTCAAGCTTTAATTTGGTATCTCCA	30
AT108		4	17734891	C	G	TGTTTTGTTGCAGTCATATAAGTTAAAATTTC	32	GAAGGTGACCAAGTTCATGCTTGTTTTGTTGCAGTCATATAAGTTAAAATTTC	GTTTTGTTGCAGTCATATAAGTTAAAATTTG	31	GAAGGTCGGAGTCAACGGATTGTTTTGTTGCAGTCATATAAGTTAAAATTTG	GTGCTACAACTAGTAAAACCACTAACAATT	30
AT109		4	18306326	C	A	CCGTAAAGCTTGAGCATCCTAGC	23	GAAGGTGACCAAGTTCATGCTCCGTAAAGCTTGAGCATCCTAGC	ATCCGTAAAGCTTGAGCATCCTAGA	25	GAAGGTCGGAGTCAACGGATTATCCGTAAAGCTTGAGCATCCTAGA	GTACGGCGAATCAAAATCCACCGAA	25
AT110		4	18488307	G	C	ACTCAGGTAACTCTAGCCACCG	22	GAAGGTGACCAAGTTCATGCTACTCAGGTAACTCTAGCCACCG	ACTCAGGTAACTCTAGCCACCC	22	GAAGGTCGGAGTCAACGGATTACTCAGGTAACTCTAGCCACCC	GTTTGATACATTACCAACTAGGCTAAGATA	30
AT111	K4_18584386	4	18584386	T	C	GGTTAACCCTTCGATAAGCACAGTT	25	GAAGGTGACCAAGTTCATGCTGGTTAACCCTTCGATAAGCACAGTT	GGTTAACCCTTCGATAAGCACAGTC	25	GAAGGTCGGAGTCAACGGATTGGTTAACCCTTCGATAAGCACAGTC	TCGACCGAGATTACCTGGATGTACT	25
AT112	K5_00000257	5	257	T	C	GATTATCCTATAATTATGTTTTGCGGCTTT	30	GAAGGTGACCAAGTTCATGCTGATTATCCTATAATTATGTTTTGCGGCTTT	GATTATCCTATAATTATGTTTTGCGGCTTC	30	GAAGGTCGGAGTCAACGGATTGATTATCCTATAATTATGTTTTGCGGCTTC	TCCCTGACTCGACCACTAAACAACA	25
AT113		5	342420	A	G	AGACCCGACACTGTCAGTTTCTTA	24	GAAGGTGACCAAGTTCATGCTAGACCCGACACTGTCAGTTTCTTA	GACCCGACACTGTCAGTTTCTTG	23	GAAGGTCGGAGTCAACGGATTGACCCGACACTGTCAGTTTCTTG	GTCTTCAGGATGGGCGTCCTGT	22
AT114		5	1158677	A	C	GACTCTGACTCGTTCTTTCTTTTATTA	27	GAAGGTGACCAAGTTCATGCTGACTCTGACTCGTTCTTTCTTTTATTA	GACTCTGACTCGTTCTTTCTTTTATTC	27	GAAGGTCGGAGTCAACGGATTGACTCTGACTCGTTCTTTCTTTTATTC	GTTTTTCCCGATGAAAATCTTTAAAGAAAA	30
AT115		5	1757430	G	C	TGTTTTTTACCGCCTTCTGACCTG	24	GAAGGTGACCAAGTTCATGCTTGTTTTTTACCGCCTTCTGACCTG	GTTTTTTACCGCCTTCTGACCTC	23	GAAGGTCGGAGTCAACGGATTGTTTTTTACCGCCTTCTGACCTC	TCGATTTCTTCTTCTTCATCATCGTCCTT	29
AT116		5	2520074	T	G	GACCGGAATTGACCGGGTTTTGT	23	GAAGGTGACCAAGTTCATGCTGACCGGAATTGACCGGGTTTTGT	ACCGGAATTGACCGGGTTTTGG	22	GAAGGTCGGAGTCAACGGATTACCGGAATTGACCGGGTTTTGG	AGCGATGCCAGCCCAGATAAGTAAA	25
AT117	Rcl1B	5	3284989	T	G	CTTTGATTCATGGTGCTTCATCTAGT	26	GAAGGTGACCAAGTTCATGCTCTTTGATTCATGGTGCTTCATCTAGT	CTTTGATTCATGGTGCTTCATCTAGG	26	GAAGGTCGGAGTCAACGGATTCTTTGATTCATGGTGCTTCATCTAGG	TGGACAACATGGATCTTCATCATCATATTA	30
AT118		5	4057745	C	G	ATCCTCTCCGACTAAGCCACAC	22	GAAGGTGACCAAGTTCATGCTATCCTCTCCGACTAAGCCACAC	ATCCTCTCCGACTAAGCCACAG	22	GAAGGTCGGAGTCAACGGATTATCCTCTCCGACTAAGCCACAG	TCTTCTCTGATGCGAAAGTTACATCAGTA	29
AT119		5	4634542	T	A	GTACAAGACAAAGAAAATGTATAGAACTTTAT	32	GAAGGTGACCAAGTTCATGCTGTACAAGACAAAGAAAATGTATAGAACTTTAT	GTACAAGACAAAGAAAATGTATAGAACTTTAA	32	GAAGGTCGGAGTCAACGGATTGTACAAGACAAAGAAAATGTATAGAACTTTAA	CTTTTGTGATAACATTCACGTGAAACCAAA	30
AT120		5	5414677	A	G	TCTTTTTAATTACTTTCACATATTTCATCATA	32	GAAGGTGACCAAGTTCATGCTTCTTTTTAATTACTTTCACATATTTCATCATA	CTTTTTAATTACTTTCACATATTTCATCATG	31	GAAGGTCGGAGTCAACGGATTCTTTTTAATTACTTTCACATATTTCATCATG	GGGGGTAATTTGTTTGTGTTGGTCTTTTT	29
AT121		5	5791427	C	A	CATTGATCATTCGATTCATACTAAATTTAATTC	33	GAAGGTGACCAAGTTCATGCTCATTGATCATTCGATTCATACTAAATTTAATTC	CATTGATCATTCGATTCATACTAAATTTAATTA	33	GAAGGTCGGAGTCAACGGATTCATTGATCATTCGATTCATACTAAATTTAATTA	TGCAAGGAATCTAGGTTTTAGTTCAAGTTT	30
AT122		5	8000694	T	C	CAAGCGACCAAGAAATTTATCCAAGAT	27	GAAGGTGACCAAGTTCATGCTCAAGCGACCAAGAAATTTATCCAAGAT	AAGCGACCAAGAAATTTATCCAAGAC	26	GAAGGTCGGAGTCAACGGATTAAGCGACCAAGAAATTTATCCAAGAC	CGAAGAATATTGGCTACTATTGAGGAGTA	29
AT123		5	8319308	C	G	CGCTAGTTTTGATAGCAATATTAACCAC	28	GAAGGTGACCAAGTTCATGCTCGCTAGTTTTGATAGCAATATTAACCAC	CGCTAGTTTTGATAGCAATATTAACCAG	28	GAAGGTCGGAGTCAACGGATTCGCTAGTTTTGATAGCAATATTAACCAG	CAAATTTGAGGTATGGATGATGGCACTT	28
AT124		5	9691551	T	G	GCCTATTGGCACTTAAGAAATCACATTTT	29	GAAGGTGACCAAGTTCATGCTGCCTATTGGCACTTAAGAAATCACATTTT	CCTATTGGCACTTAAGAAATCACATTTG	28	GAAGGTCGGAGTCAACGGATTCCTATTGGCACTTAAGAAATCACATTTG	CATTCTGCGCTCGTGCTTACTAGAT	25
AT125		5	10910555	T	G	CCAATGTTGCATAAACACTGTTTCGTT	27	GAAGGTGACCAAGTTCATGCTCCAATGTTGCATAAACACTGTTTCGTT	CAATGTTGCATAAACACTGTTTCGTG	26	GAAGGTCGGAGTCAACGGATTCAATGTTGCATAAACACTGTTTCGTG	GGGCTATATCTCTCATACTTCTATCGAAA	29
AT126		5	11489523	G	A	CATTCCCTACTAGCTTAATCTCGG	24	GAAGGTGACCAAGTTCATGCTCATTCCCTACTAGCTTAATCTCGG	AATCATTCCCTACTAGCTTAATCTCGA	27	GAAGGTCGGAGTCAACGGATTAATCATTCCCTACTAGCTTAATCTCGA	CTACAAAGTTCTTTTGTTCCCACAATGAAT	30
AT127		5	11982076	A	G	AGGTGGGTGGAGTCTGGTGTA	21	GAAGGTGACCAAGTTCATGCTAGGTGGGTGGAGTCTGGTGTA	GGTGGGTGGAGTCTGGTGTG	20	GAAGGTCGGAGTCAACGGATTGGTGGGTGGAGTCTGGTGTG	GGATATGTTTAAGCTCAGACTATTTCCCTT	30
AT128		5	13699181	T	A	ACGATTTGCAAAAATTTCTTTGTTAATTACATT	33	GAAGGTGACCAAGTTCATGCTACGATTTGCAAAAATTTCTTTGTTAATTACATT	ACGATTTGCAAAAATTTCTTTGTTAATTACATA	33	GAAGGTCGGAGTCAACGGATTACGATTTGCAAAAATTTCTTTGTTAATTACATA	AAATCGGATCCTTCCATATTTAAATATTT	29
AT129		5	14281840	C	T	TTGAGGGTGCAATAAAGCAATAGTAC	26	GAAGGTGACCAAGTTCATGCTTTGAGGGTGCAATAAAGCAATAGTAC	TTTGAGGGTGCAATAAAGCAATAGTAT	27	GAAGGTCGGAGTCAACGGATTTTTGAGGGTGCAATAAAGCAATAGTAT	GTAACCCAACAAACCAAGTGAACAATCAA	29
AT130		5	14902787	G	A	GGCCGCAACTCTAATTAAACATAAAATG	28	GAAGGTGACCAAGTTCATGCTGGCCGCAACTCTAATTAAACATAAAATG	AGGCCGCAACTCTAATTAAACATAAAATA	29	GAAGGTCGGAGTCAACGGATTAGGCCGCAACTCTAATTAAACATAAAATA	CGATTTTATTCAAGCTGGATGGACTGTAA	29
AT131		5	16512155	A	G	CATCCATTAGTCAACTCTTATTGGGAA	27	GAAGGTGACCAAGTTCATGCTCATCCATTAGTCAACTCTTATTGGGAA	ATCCATTAGTCAACTCTTATTGGGAG	26	GAAGGTCGGAGTCAACGGATTATCCATTAGTCAACTCTTATTGGGAG	CTTGATTTAACAAGTTCATTGGTCTTTGTT	30
AT132		5	16898044	A	G	CACTGTGAAAGCAGTCGCAGCAA	23	GAAGGTGACCAAGTTCATGCTCACTGTGAAAGCAGTCGCAGCAA	ACTGTGAAAGCAGTCGCAGCAG	22	GAAGGTCGGAGTCAACGGATTACTGTGAAAGCAGTCGCAGCAG	TCGCTGAAAAGAAGAATGACTGTTGGAAT	29
AT133		5	17098643	A	T	AACCCATTTAGTGATCAAACCCGGA	25	GAAGGTGACCAAGTTCATGCTAACCCATTTAGTGATCAAACCCGGA	AACCCATTTAGTGATCAAACCCGGT	25	GAAGGTCGGAGTCAACGGATTAACCCATTTAGTGATCAAACCCGGT	CGAATCCCGCAGATACAAAGCTCAA	25
AT134	FM4_2	5	17166776	T	A	ACGTGGATTCTAAAACACAGAATCAATAT	29	GAAGGTGACCAAGTTCATGCTACGTGGATTCTAAAACACAGAATCAATAT	ACGTGGATTCTAAAACACAGAATCAATAA	29	GAAGGTCGGAGTCAACGGATTACGTGGATTCTAAAACACAGAATCAATAA	CTCTCTGTTTGGAGGAGAGTCAAAATTAA	29
AT135		5	17901677	A	C	TTTTCTGTTGTTGTGACATATTTGCGTA	28	GAAGGTGACCAAGTTCATGCTTTTTCTGTTGTTGTGACATATTTGCGTA	TCTGTTGTTGTGACATATTTGCGTC	25	GAAGGTCGGAGTCAACGGATTTCTGTTGTTGTGACATATTTGCGTC	CAACTTGCTTGTTCTTGAAGAAACTGCTT	29
AT136		5	18359224	C	T	ATTTAGATTTTTGAGCATTACTAGTGAC	28	GAAGGTGACCAAGTTCATGCTATTTAGATTTTTGAGCATTACTAGTGAC	AACTATTTAGATTTTTGAGCATTACTAGTGAT	32	GAAGGTCGGAGTCAACGGATTAACTATTTAGATTTTTGAGCATTACTAGTGAT	CCTTGTGTGATTTTTTTCCCTATGTCAATA	30
AT137		5	18742899	T	A	GAATCTACCCAAAGGTCTTCTTCCT	25	GAAGGTGACCAAGTTCATGCTGAATCTACCCAAAGGTCTTCTTCCT	GAATCTACCCAAAGGTCTTCTTCCA	25	GAAGGTCGGAGTCAACGGATTGAATCTACCCAAAGGTCTTCTTCCA	GTGACCGATCTCTGTCATGTTGTCTA	26
AT138		5	19351539	T	G	GCAAAAAACTCAGATTGGAGCTGGT	25	GAAGGTGACCAAGTTCATGCTGCAAAAAACTCAGATTGGAGCTGGT	CAAAAAACTCAGATTGGAGCTGGG	24	GAAGGTCGGAGTCAACGGATTCAAAAAACTCAGATTGGAGCTGGG	CAATCAGGGGGATGCCAGTTTGATT	25
AT139		5	19755750	C	T	CTGTTTTGCCTTTGATTGTTGAACC	25	GAAGGTGACCAAGTTCATGCTCTGTTTTGCCTTTGATTGTTGAACC	CTCTGTTTTGCCTTTGATTGTTGAACT	27	GAAGGTCGGAGTCAACGGATTCTCTGTTTTGCCTTTGATTGTTGAACT	GGTTCAAGCCCATGGTTGTTAGGTA	25
AT140		5	19941113	A	T	AAACTGCCATATTACCGGAGAACCA	25	GAAGGTGACCAAGTTCATGCTAAACTGCCATATTACCGGAGAACCA	AAACTGCCATATTACCGGAGAACCT	25	GAAGGTCGGAGTCAACGGATTAAACTGCCATATTACCGGAGAACCT	CATGGCCTTCCAAGATATGCTTTGTTTAT	29
AT141		5	20318904	A	G	CTATGATACTATCAGTAACCAAACTCA	27	GAAGGTGACCAAGTTCATGCTCTATGATACTATCAGTAACCAAACTCA	CTATGATACTATCAGTAACCAAACTCG	27	GAAGGTCGGAGTCAACGGATTCTATGATACTATCAGTAACCAAACTCG	CCACAGCCTTGTCACCAAAAACCTA	25
AT142		5	20698415	G	A	TTTTATTTTGGCTCTTTGATAACTTGAATTTG	32	GAAGGTGACCAAGTTCATGCTTTTTATTTTGGCTCTTTGATAACTTGAATTTG	TTTATTTTGGCTCTTTGATAACTTGAATTTA	31	GAAGGTCGGAGTCAACGGATTTTTATTTTGGCTCTTTGATAACTTGAATTTA	ACGGTGGAACAACACGTTGAAAATGTAA	28
AT143		5	21466028	A	G	AATAGACTCAATGGTGCAGAGTTTCAA	27	GAAGGTGACCAAGTTCATGCTAATAGACTCAATGGTGCAGAGTTTCAA	AGACTCAATGGTGCAGAGTTTCAG	24	GAAGGTCGGAGTCAACGGATTAGACTCAATGGTGCAGAGTTTCAG	AAGGTAAGCCACGCCTGATTTCCTT	25
AT144		5	21884520	A	T	GGACTTCCATGCATGTCCCA	20	GAAGGTGACCAAGTTCATGCTGGACTTCCATGCATGTCCCA	CTGGACTTCCATGCATGTCCCT	22	GAAGGTCGGAGTCAACGGATTCTGGACTTCCATGCATGTCCCT	GACATGAAGATGACATTCTAAAGAACTCTT	30
AT145		5	22447290	G	A	CGGCTCCAGAAGTCTTGTAGG	21	GAAGGTGACCAAGTTCATGCTCGGCTCCAGAAGTCTTGTAGG	GCGGCTCCAGAAGTCTTGTAGA	22	GAAGGTCGGAGTCAACGGATTGCGGCTCCAGAAGTCTTGTAGA	GTGTTCAATGAGCCCTACCTAGCTA	25
AT146		5	22851145	A	T	TCTTATAGCTCTTTACCCAATTTTGATCA	29	GAAGGTGACCAAGTTCATGCTTCTTATAGCTCTTTACCCAATTTTGATCA	CTTATAGCTCTTTACCCAATTTTGATCT	28	GAAGGTCGGAGTCAACGGATTCTTATAGCTCTTTACCCAATTTTGATCT	GACTAGGGGCACGTCGAATATGTTT	25
AT147		5	23115566	T	A	CAATAACTTCGGTGTTGAATGTTTTATATTT	31	GAAGGTGACCAAGTTCATGCTCAATAACTTCGGTGTTGAATGTTTTATATTT	CAATAACTTCGGTGTTGAATGTTTTATATTA	31	GAAGGTCGGAGTCAACGGATTCAATAACTTCGGTGTTGAATGTTTTATATTA	ATATCAATGGGCCATACATTGTACATACAT	30
AT148		5	23635094	A	G	ATCGCCTTCTCTCTGTCTCTCTA	23	GAAGGTGACCAAGTTCATGCTATCGCCTTCTCTCTGTCTCTCTA	CGCCTTCTCTCTGTCTCTCTG	21	GAAGGTCGGAGTCAACGGATTCGCCTTCTCTCTGTCTCTCTG	CCATGCATGCAGATTATTCTCTCAGATAT	29
AT149		5	26479586	C	A	CGGCACGCTGTTGTCTTGCAC	21	GAAGGTGACCAAGTTCATGCTCGGCACGCTGTTGTCTTGCAC	ACGGCACGCTGTTGTCTTGCAA	22	GAAGGTCGGAGTCAACGGATTACGGCACGCTGTTGTCTTGCAA	GTTTTCTCAACTCCGCCAAGGAGAA	25
AT150		5	26818417	T	G	GTAAAGAAAAGAGGGGAGGGTGTT	24	GAAGGTGACCAAGTTCATGCTGTAAAGAAAAGAGGGGAGGGTGTT	AAAGAAAAGAGGGGAGGGTGTG	22	GAAGGTCGGAGTCAACGGATTAAAGAAAAGAGGGGAGGGTGTG	CGGTACAACCAACCACCTCTATTCTA	26
AT151	K5_26974816	5	26974816	C	G	GCATCAAATTCAAATTGTCGAAC	23	GAAGGTGACCAAGTTCATGCTGCATCAAATTCAAATTGTCGAAC	GCATCAAATTCAAATTGTCGAAG	23	GAAGGTCGGAGTCAACGGATTGCATCAAATTCAAATTGTCGAAG	CATGTGAGTCCATTTTTGTGAGTTT	25

## Sheet: Table S5 Genotype file RILs
	C1_001	C1_002	C1_003	C1_004	C1_005	C1_006	C1_007	C1_008	C1_009	C1_010	C1_011	C1_012	C1_013	C1_014	C1_015	C1_016	C1_017	C1_018	C1_019	C1_020	C1_021	C1_022	C1_023	C1_024	C1_025	C1_026	C1_027	C1_028	C1_029	C1_030	C1_031	C1_032	C1_033	C1_034	C1_035	C1_036	C1_037	C1_038	C1_039	C1_040	C1_041	C1_042	C1_043	C1_044	C1_045	C1_046	C1_047	C1_048	C1_049
CS933_Col	a	a	a	a	a	a	a	a	a	a	a	a	a	a	a	a	a	a	a	a	a	a	a	a	a	a	a	a	a	a	a	a	a	a	a	a	a	a	a	a	a	a	a	a	a	a	a	a	a
CS20_Ler	b	b	b	b	b	b	b	b	b	b	b	b	b	b	b	b	b	b	b	b	b	b	b	b	b	b	b	b	b	b	b	b	b	b	b	b	b	b	b	b	b	b	b	b	b	b	b	b	b
CS1900	b	b	b	b	b	b	b	b	b	b	b	b	b	b	b	b	b	b	b	b	b	b	b	b	b	b	b	b	b	b	b	b	b	b	b	b	b	b	b	b	b	b	b	b	b	b	b	b	b
CS1901	a	a	a	a	a	a	a	a	a	a	a	a	a	a	a	b	b	b	b	b	b	b	b	b	b	b	b	b	b	b	b	b	b	b	b	b	b	b	b	b	b	b	b	b	b	b	b	b	b
CS1903	a	a	a	a	a	a	a	a	a	a	a	a	a	a	a	a	a	a	a	a	b	b	b	b	b	b	b	b	b	b	b	b	b	b	b	b	b	b	b	b	b	b	b	b	b	b	b	b	b
CS1904	b	b	b	b	b	b	b	b	b	b	b	b	b	b	b	b	b	b	b	b	b	b	b	b	b	b	b	b	b	b	b	b	b	b	b	b	b	b	b	b	b	b	b	b	b	b	b	b	b
CS1905	b	b	b	b	b	b	b	b	b	b	b	b	b	b	b	b	b	b	b	b	b	b	b	b	b	b	b	b	b	b	b	b	b	b	b	b	b	b	b	b	b	b	b	b	b	b	b	b	b
CS1906	a	a	a	a	a	a	a	a	a	a	a	a	a	a	a	a	a	a	a	a	a	a	a	a	a	a	a	a	a	a	a	a	a	a	a	a	a	a	a	a	a	a	a	a	a	a	a	a	a
CS1907	b	b	b	b	b	b	b	b	b	b	b	b	b	b	b	b	b	b	b	b	b	b	b	b	b	b	b	b	b	b	b	b	b	b	b	b	b	b	b	b	b	b	b	b	b	b	b	b	b
CS1908	a	a	a	a	a	a	a	a	a	a	a	a	a	a	a	a	a	a	a	a	a	a	a	a	a	a	a	a	a	a	a	a	a	a	a	a	a	a	a	a	a	a	a	a	a	a	a	b	b
CS1909	a	a	a	a	a	a	a	a	a	a	a	a	a	a	a	a	a	a	a	a	a	b	b	b	b	b	b	b	b	b	b	b	b	b	b	b	b	b	b	b	b	b	b	b	b	b	b	b	b
CS1910	a	a	a	a	a	a	a	a	a	a	a	a	a	a	a	a	a	a	a	a	a	a	a	a	a	a	a	a	a	a	a	a	a	a	a	a	a	a	a	a	a	a	a	a	a	b	b	b	b
CS1911	b	b	b	b	b	b	b	b	b	b	b	b	b	b	b	b	b	b	b	b	b	b	b	b	b	b	b	b	b	b	b	b	b	b	b	b	b	b	b	b	b	b	b	b	b	b	b	b	b
CS1912	a	a	a	a	a	a	a	a	a	a	a	a	a	a	a	a	a	a	a	a	a	a	a	a	a	a	a	a	a	a	a	a	a	a	a	a	a	a	a	a	a	a	a	a	b	b	b	b	b
CS1913	b	b	b	b	b	b	b	b	b	b	b	b	b	b	b	b	b	b	b	b	b	b	b	b	b	b	b	b	b	b	b	b	b	b	b	b	b	b	b	b	b	b	b	b	b	b	b	b	b
CS1914	b	b	b	b	b	b	b	b	b	a	a	a	a	a	a	a	a	a	a	a	a	a	a	a	a	a	a	a	a	a	a	a	a	a	a	a	a	a	a	a	a	a	a	a	a	a	a	a	a
CS1915	a	a	a	a	a	a	a	a	a	a	a	a	a	a	a	a	a	a	a	a	a	a	a	a	a	a	a	a	a	a	a	a	a	a	a	a	a	a	a	a	a	a	a	a	a	a	a	a	a
CS1916	a	a	a	a	a	a	a	a	a	a	b	b	b	b	b	b	b	b	b	b	b	b	b	b	b	b	b	b	b	b	b	b	b	b	b	a	a	a	a	a	a	a	a	a	a	a	a	a	a
CS1917	b	b	b	b	b	b	b	b	b	b	b	b	b	b	b	b	b	b	b	b	b	b	b	b	b	b	b	b	b	b	b	b	b	b	b	b	b	b	b	b	b	b	b	b	b	b	b	b	b
CS1918	a	a	a	a	a	a	a	a	a	a	a	a	a	a	a	a	a	a	a	a	a	a	a	a	a	a	a	a	a	a	a	a	a	a	a	a	a	a	a	a	a	a	a	a	a	a	a	a	a
CS1919	a	a	a	a	a	a	a	a	a	a	a	a	a	a	a	a	a	a	a	a	a	a	a	a	a	a	a	a	a	a	a	a	a	a	a	a	a	a	a	a	a	a	a	a	a	a	a	a	a
CS1920	a	a	a	a	a	a	a	a	a	a	a	a	a	a	a	a	a	a	a	a	a	a	a	a	a	a	a	a	a	a	a	a	a	a	a	a	a	a	a	a	a	a	a	a	a	a	a	a	a
CS1921	b	b	b	b	b	b	b	b	b	b	b	b	b	b	b	b	b	b	b	b	b	b	b	b	b	b	b	b	b	b	b	b	b	b	b	b	b	b	b	a	a	a	b	b	b	b	b	b	b
CS1922	b	b	b	b	b	b	b	b	b	b	b	b	b	b	b	b	b	b	b	b	b	b	b	b	b	b	b	b	b	b	b	b	b	b	b	b	b	b	b	b	b	b	b	b	b	b	b	b	b
CS1923	b	b	b	b	b	b	b	b	b	b	b	b	b	b	b	b	b	b	b	b	b	b	b	b	b	b	b	b	b	b	b	b	b	b	b	b	b	b	b	b	b	b	b	b	b	b	b	b	b
CS1924	a	a	a	a	a	a	a	a	a	a	a	a	a	a	a	a	a	a	a	a	a	a	a	a	a	a	a	a	a	a	a	a	a	a	a	a	a	a	a	a	a	a	a	a	a	a	a	a	a
CS1925	a	a	a	a	a	a	a	a	a	a	a	a	a	a	a	a	a	a	a	a	a	a	a	a	a	a	a	a	a	a	a	a	a	a	a	a	a	a	a	a	a	a	a	a	a	a	a	a	a
CS1926	a	a	a	a	a	a	a	a	a	a	a	a	a	a	a	a	a	a	a	a	a	a	a	a	a	a	a	a	a	a	a	a	a	a	a	a	a	a	a	a	a	a	a	a	a	a	a	a	a
CS1927	b	b	b	b	b	b	b	b	b	b	b	b	b	b	b	b	b	b	b	b	b	b	b	b	b	b	b	b	b	b	b	b	b	b	b	b	b	b	b	b	b	b	b	b	b	b	b	b	b
CS1928	b	b	b	b	b	b	b	b	b	b	b	b	b	b	b	b	b	b	b	b	b	b	b	b	b	b	b	b	b	b	b	b	b	b	b	b	b	b	b	b	b	b	b	b	b	b	b	b	b
CS1929	b	b	b	b	b	b	b	b	b	b	b	b	b	b	b	b	a	a	a	b	b	b	b	b	a	a	a	a	a	a	a	a	a	a	a	a	a	a	a	a	a	a	a	a	a	a	a	a	a
CS1930	a	a	a	a	a	a	a	a	a	a	a	a	a	a	a	a	a	a	a	a	a	a	a	a	a	a	a	a	a	a	a	a	a	a	a	a	a	a	a	a	a	a	a	a	a	a	a	a	a
CS1931	a	a	a	a	a	a	a	a	a	a	a	a	a	a	a	a	a	a	a	a	a	a	a	a	a	a	a	a	a	a	a	a	a	a	a	a	a	a	a	a	a	a	a	a	a	a	a	a	a
CS1932	b	b	b	b	b	b	b	b	b	b	b	b	b	b	b	b	b	b	b	b	b	b	b	a	a	a	a	a	a	a	a	a	a	a	a	a	a	a	a	a	a	a	a	a	a	a	a	a	a
CS1933	b	b	b	b	b	b	b	b	b	b	b	b	b	b	b	b	b	b	b	b	b	b	b	b	b	b	b	b	b	b	b	b	b	b	b	b	b	b	b	b	b	b	b	b	b	b	b	b	b
CS1934	b	a	a	a	a	a	a	a	a	a	a	a	a	a	a	a	a	a	a	a	a	a	a	a	a	a	a	a	a	a	a	a	a	a	a	a	a	a	a	a	a	a	a	a	a	a	a	a	a
CS1935	b	b	b	b	b	b	b	b	b	b	b	b	b	b	b	b	b	b	b	b	b	b	b	b	b	b	b	b	b	b	b	b	b	b	b	b	b	b	b	b	b	b	b	b	b	b	a	a	a
CS1937	b	b	b	b	b	b	b	b	b	b	b	b	b	b	b	b	b	b	b	b	b	b	b	b	b	b	b	b	b	b	b	b	b	b	b	b	b	b	b	b	b	b	b	b	b	b	b	b	b
CS1938	a	a	a	a	a	a	a	a	a	a	a	a	a	a	a	a	a	b	b	b	b	b	b	b	b	b	b	b	b	b	b	b	b	b	b	b	b	b	b	b	b	b	b	b	b	b	b	b	b
CS1939	b	b	b	b	b	b	b	b	b	b	b	b	b	b	b	b	b	b	b	b	b	b	b	b	b	b	b	b	b	b	b	b	b	b	b	b	b	b	b	b	b	b	a	a	a	a	a	a	a
CS1940	b	b	b	b	b	b	b	b	b	b	b	b	b	b	b	b	b	b	b	b	b	b	b	b	b	b	b	b	b	b	b	a	a	a	a	a	a	a	a	a	a	a	a	a	a	a	a	a	a
CS1941	b	b	b	b	a	a	a	a	a	a	a	a	a	a	a	a	a	a	a	a	a	a	a	a	a	a	a	a	a	a	a	a	a	a	a	a	a	a	a	a	a	a	a	a	a	a	a	a	a
CS1942	b	b	b	b	b	b	b	b	b	b	b	b	b	b	b	b	b	b	b	b	b	b	b	b	b	b	b	b	b	b	b	b	b	b	b	b	b	b	b	b	b	b	b	b	b	b	b	b	b
CS1943	a	a	a	a	a	a	a	a	a	a	a	a	a	a	a	a	a	a	a	a	a	a	a	a	a	a	a	a	a	a	a	a	a	a	a	a	a	a	a	a	b	b	b	b	b	b	b	b	b
CS1944	b	b	b	a	a	a	a	a	a	a	a	a	a	a	a	a	a	a	a	a	a	a	a	a	a	a	a	a	a	a	a	a	a	a	a	a	a	a	a	a	a	a	a	a	a	a	a	a	a
CS1945	b	b	b	b	b	b	b	b	b	b	b	b	b	b	b	b	b	b	b	b	b	b	b	b	b	b	b	b	b	b	b	b	b	b	b	b	b	b	b	b	b	b	b	b	b	b	b	b	b
CS1946	b	b	b	b	b	b	b	b	b	b	b	b	b	b	b	b	b	b	b	b	b	b	b	b	b	b	b	b	b	a	a	a	a	a	a	a	a	a	a	a	a	a	a	a	a	a	a	a	a
CS1947	a	a	a	a	a	a	a	a	a	a	a	a	a	a	a	a	a	a	a	a	a	a	a	a	a	a	a	a	b	b	b	b	b	b	b	b	b	b	b	b	b	b	b	b	b	b	b	b	b
CS1948	a	a	a	a	a	a	a	a	a	a	a	a	a	a	a	a	a	a	a	a	a	a	a	a	a	a	a	a	a	a	a	a	a	a	a	a	a	a	a	a	a	a	a	a	a	a	a	a	b
CS1949	b	b	b	b	b	b	b	b	b	b	b	b	b	b	b	b	b	b	b	b	b	b	b	b	b	b	b	b	b	b	b	b	a	a	a	a	a	a	a	a	a	a	a	a	a	a	a	a	a
CS1950	b	b	b	b	b	b	b	b	b	b	b	b	b	b	b	b	b	b	b	b	b	b	b	b	b	b	b	b	b	b	b	b	b	b	b	b	b	b	b	b	b	b	b	b	b	b	b	b	b
CS1951	b	b	b	b	b	b	b	b	b	b	b	b	b	b	b	b	b	b	b	b	b	b	b	b	b	b	b	b	b	b	b	b	b	b	b	b	b	b	b	b	b	b	b	b	b	b	b	b	b
CS1952	a	a	a	a	a	a	a	a	a	a	a	a	a	a	a	a	a	a	a	a	a	b	b	b	b	b	b	b	b	b	b	b	b	b	b	b	b	b	b	b	b	b	b	a	a	a	a	a	a
CS1953	a	a	a	a	a	a	a	a	a	a	a	a	a	a	a	a	a	a	a	a	a	a	a	a	a	a	a	a	a	a	b	b	b	b	b	b	b	b	b	b	b	b	b	b	b	b	b	b	b
CS1954	a	a	a	a	a	a	a	a	a	a	a	a	a	a	a	a	a	a	a	a	a	a	a	a	a	a	a	a	a	a	a	a	b	b	b	b	b	b	b	b	b	b	b	b	b	b	b	b	b
CS1955	a	a	a	a	a	a	a	a	a	a	a	a	a	a	a	a	a	a	a	a	a	a	a	a	a	a	a	a	a	a	a	a	a	a	b	b	b	b	b	b	b	b	b	b	b	b	b	b	b
CS1956	a	a	a	a	a	a	a	a	a	a	a	a	a	a	a	a	a	a	a	a	a	a	a	a	a	a	a	a	a	a	a	a	a	a	a	a	a	a	a	a	a	a	a	a	a	a	a	a	a
CS1957	a	a	a	a	a	a	a	a	a	a	a	a	a	a	b	b	b	b	b	b	b	b	b	b	b	b	b	b	b	b	b	b	b	b	b	b	b	b	b	b	b	b	b	b	b	b	b	b	b
CS1958	b	b	b	b	b	b	b	b	b	b	b	b	b	b	b	b	b	b	b	b	b	b	b	b	b	b	b	b	b	b	b	b	b	b	b	b	b	b	b	b	b	b	b	b	b	b	b	b	b
CS1959	b	b	b	b	b	b	b	b	b	b	b	b	b	b	b	b	b	b	b	b	b	b	b	b	b	b	b	b	b	b	b	b	b	b	b	b	b	b	b	b	b	b	b	b	b	b	b	b	b
CS1960	b	b	b	b	b	b	b	b	b	b	b	b	b	b	b	b	b	b	b	b	b	b	b	b	b	b	b	b	b	b	b	b	b	b	b	b	b	b	b	b	b	b	b	b	b	b	b	b	b
CS1961	a	a	a	a	a	a	a	a	a	a	a	a	a	a	a	a	a	a	a	a	a	a	a	a	a	a	a	a	a	a	a	a	a	a	a	a	a	a	a	a	a	a	a	a	a	a	a	a	a
CS1962	b	b	b	b	b	b	b	b	b	b	b	b	b	b	b	b	b	b	b	b	b	b	b	b	b	b	b	b	b	b	b	b	b	b	b	b	b	b	b	b	b	b	b	b	b	b	b	b	b
CS1963	b	b	b	b	b	b	b	b	b	b	b	b	b	b	b	b	b	b	b	b	b	b	b	b	b	b	b	b	b	b	b	b	b	b	b	b	b	b	b	b	b	b	b	b	b	b	b	b	b
CS1964	b	b	b	b	b	b	b	b	b	b	b	b	b	b	b	b	b	b	b	b	b	b	b	b	b	b	b	b	b	b	b	b	b	b	b	b	b	b	b	b	b	b	b	b	b	b	b	b	b
CS1965	b	b	b	b	b	b	b	a	a	a	a	a	a	a	a	a	a	a	a	a	a	a	a	a	a	a	a	a	a	a	a	a	a	a	a	a	a	a	a	a	a	a	a	a	a	a	a	a	a
CS1966	b	b	b	b	b	b	b	b	b	b	b	b	b	b	b	b	b	b	b	b	b	b	b	b	b	b	b	b	b	b	b	b	b	b	b	b	b	b	b	b	b	b	b	b	b	b	b	b	b
CS1967	a	a	a	a	a	a	a	a	a	a	a	a	a	a	a	a	a	a	a	a	a	a	a	a	a	a	a	a	a	a	a	a	a	a	a	a	a	a	a	a	a	a	a	a	a	a	a	a	a
CS1968	b	b	b	b	b	b	b	b	b	b	b	b	b	b	b	b	b	b	b	b	b	b	b	b	b	b	b	b	b	b	b	b	b	b	b	b	b	b	b	b	b	b	b	b	b	b	b	b	b
CS1969	a	a	a	a	a	a	a	a	a	a	a	a	a	a	a	a	a	a	a	a	a	a	a	a	a	a	a	a	a	a	a	a	a	a	a	a	a	a	a	a	a	a	a	a	a	a	a	a	a
CS1970	b	b	b	b	b	b	a	a	a	a	a	a	a	a	a	a	a	a	a	a	a	a	a	a	a	a	a	a	a	a	a	a	a	a	a	a	a	a	a	a	a	a	a	a	a	a	a	a	a
CS1971	a	a	a	a	a	a	a	a	a	a	a	a	a	a	a	a	a	a	a	a	a	a	a	a	a	a	a	a	a	a	a	a	a	a	a	a	a	a	a	a	a	a	a	a	a	a	a	a	a
CS1972	a	a	a	a	a	a	a	a	a	a	a	a	a	a	a	a	a	a	a	a	a	a	a	a	a	a	a	a	a	a	a	a	a	a	a	a	a	a	a	a	a	a	a	a	a	a	a	a	a
CS1973	a	a	a	a	a	a	a	a	a	a	a	a	a	b	b	b	b	b	b	b	b	b	b	b	b	b	a	a	a	a	a	a	a	a	a	a	b	b	b	b	b	b	b	b	b	b	b	b	b
CS1974	a	a	a	a	a	a	a	a	a	a	a	a	a	a	a	a	a	a	a	a	a	a	a	a	a	a	a	a	a	a	a	a	a	a	a	a	a	a	a	a	a	a	a	a	a	a	a	a	a
CS1975	b	b	b	b	b	b	b	b	b	b	b	b	b	b	b	b	b	b	b	b	b	b	b	b	b	b	b	b	b	b	b	b	b	b	b	b	b	b	b	b	b	b	b	b	b	b	b	b	b
CS1976	b	b	b	b	b	b	b	b	b	b	b	b	b	b	b	b	b	b	b	b	b	b	b	b	b	b	b	b	b	b	b	b	b	b	b	b	b	b	b	b	b	b	b	b	b	b	b	b	b
CS1977	b	b	b	b	b	b	b	b	b	b	b	b	b	b	b	b	b	b	b	b	b	b	b	b	b	b	b	b	b	b	b	b	b	b	b	b	b	b	b	b	b	b	b	b	b	b	b	b	b
CS1978	b	b	b	b	b	b	b	a	a	a	a	a	a	a	a	a	a	a	a	a	a	a	a	a	a	a	a	a	a	a	a	a	a	a	a	a	a	a	a	a	a	a	a	a	a	a	a	a	a
CS1979	b	b	b	b	b	b	b	b	b	b	b	a	a	a	a	a	a	a	a	a	a	a	a	a	a	a	a	a	a	a	a	a	a	a	a	a	a	a	a	a	a	a	a	a	a	a	a	a	a
CS1980	b	b	b	b	b	b	b	b	b	b	b	b	b	b	b	b	b	b	b	b	b	b	b	b	b	b	b	b	b	b	b	b	b	b	b	b	b	b	b	b	b	b	b	b	b	b	b	b	b
CS1981	a	a	a	a	a	a	a	a	a	a	a	a	a	a	a	a	a	a	a	a	a	b	b	b	b	b	b	b	b	b	b	b	b	b	b	b	b	b	b	b	b	b	b	b	b	b	b	b	b
CS1982	b	a	a	a	a	a	a	a	a	a	a	a	a	a	a	a	a	a	a	a	a	a	a	a	a	a	a	a	a	a	a	a	a	a	a	a	a	a	a	a	a	a	a	a	a	a	a	a	a
CS1983	b	b	b	b	b	b	b	b	b	b	b	b	b	b	b	b	b	b	b	b	b	b	b	b	b	b	b	b	b	b	b	b	b	b	b	b	b	b	b	b	b	b	b	b	b	b	b	b	b
CS1984	b	b	b	b	b	b	b	b	b	b	b	b	b	b	b	b	b	b	b	b	b	b	b	b	b	b	b	b	b	b	b	b	b	b	b	b	b	b	b	b	b	b	b	b	b	b	b	b	b
CS1985	b	b	b	b	b	b	b	b	a	a	a	a	a	a	a	a	a	a	a	a	a	a	a	a	a	a	a	a	a	a	a	a	a	a	a	a	a	a	a	a	a	a	a	a	a	a	a	a	a
CS1986	a	a	a	a	a	a	a	a	a	a	a	a	a	a	a	a	a	a	a	a	a	a	a	a	a	a	a	a	a	a	a	a	a	a	a	a	a	a	a	a	a	a	a	a	a	a	a	a	a
CS1987	b	b	b	b	b	b	b	b	b	b	b	b	b	b	b	b	b	b	b	b	b	b	b	b	b	a	a	a	a	a	a	a	a	a	a	a	a	a	a	a	a	a	a	a	a	a	a	a	a
CS1989	a	a	b	b	b	b	b	b	b	b	b	b	b	b	b	b	b	b	b	b	b	b	b	b	b	b	b	b	b	b	b	b	b	b	b	b	b	b	b	b	b	b	b	b	b	b	b	b	b
CS1990	b	b	b	b	b	b	b	b	b	b	b	b	a	a	a	a	a	a	a	a	a	a	a	a	a	a	a	b	b	b	b	b	b	b	b	b	b	b	b	b	b	a	a	a	a	a	a	a	a
CS1991	a	a	a	a	a	a	a	a	a	a	a	a	a	a	a	a	a	a	a	a	a	a	a	a	a	a	a	a	a	a	a	a	a	a	a	a	a	a	a	a	a	a	a	a	a	a	a	a	a
CS1992	a	a	a	a	a	a	a	a	a	a	a	a	a	a	a	a	a	a	a	a	a	a	a	a	a	a	a	a	a	a	a	a	a	a	a	a	a	a	a	a	a	a	a	a	a	a	a	a	a
CS1993	b	b	b	b	b	b	b	b	b	b	b	b	b	b	b	b	b	b	b	b	b	b	b	b	b	b	b	b	b	b	b	b	b	b	b	b	b	b	b	b	b	b	b	b	b	b	b	b	b
CS1994	a	a	a	a	a	a	a	a	a	a	a	a	a	a	a	a	a	a	a	a	a	a	a	a	a	a	a	a	a	a	a	a	a	a	a	a	a	a	a	a	a	a	a	a	a	a	a	a	a
CS1995	a	a	a	a	a	a	a	a	a	a	a	a	a	a	a	a	a	a	a	a	a	a	a	a	a	a	a	a	a	a	a	a	a	a	a	a	a	a	a	a	a	a	a	a	a	a	a	a	a
CS1996	a	a	a	a	a	b	b	b	b	b	b	b	b	b	b	b	b	b	a	a	a	a	a	a	a	a	a	a	a	a	a	a	a	b	b	b	b	b	b	b	b	b	b	b	b	b	b	b	b
CS1997	a	a	a	a	a	a	a	a	a	a	a	a	a	a	a	a	a	a	a	a	a	a	b	b	b	b	b	b	b	b	b	b	b	b	b	b	b	b	b	b	b	b	b	b	b	b	b	b	b
CS1998	a	a	a	a	a	a	a	a	a	a	a	a	a	a	a	a	a	a	a	a	a	a	a	a	a	a	a	a	a	a	a	a	a	a	a	a	a	b	b	b	b	b	b	b	b	b	b	b	b
CS1999	b	b	b	b	b	b	b	b	b	b	b	b	b	b	b	b	b	b	b	b	b	b	b	b	b	b	b	b	b	b	b	b	b	b	b	b	b	b	a	a	a	a	a	a	a	a	a	a	a
CS4686	a	a	a	a	a	a	a	a	a	a	a	a	a	a	a	a	a	a	a	a	a	b	b	b	b	b	b	b	b	b	b	b	b	b	b	b	b	b	b	b	b	b	b	b	b	b	b	b	b
[truncated: 627 more columns]

## Sheet: Table S6 Map RILs
Marker	Linkage group	Genetic position (cM)
C1_001	1	3.38986
C1_002	1	6.19486
C1_003	1	7.36651
C1_004	1	7.80485
C1_005	1	9.66892
C1_006	1	11.7762
C1_007	1	12.4596
C1_008	1	13.7096
C1_009	1	14.6417
C1_010	1	16.1305
C1_011	1	20.6026
C1_012	1	21.1223
C1_013	1	21.3087
C1_014	1	21.4967
C1_015	1	21.9011
C1_016	1	22.9932
C1_017	1	23.073
C1_018	1	23.1403
C1_019	1	24.0683
C1_020	1	25.946
C1_021	1	26.9722
C1_022	1	27.7355
C1_023	1	29.2721
C1_024	1	29.3506
C1_025	1	30.1736
C1_026	1	30.7518
C1_027	1	31.1457
C1_028	1	31.7311
C1_029	1	32.4663
C1_030	1	34.723
C1_031	1	35.3624
C1_032	1	36.2974
C1_033	1	38.177
C1_034	1	38.5842
C1_035	1	38.9683
C1_036	1	39.51
C1_037	1	39.7692
C1_038	1	40.2844
C1_039	1	40.4817
C1_040	1	40.724
C1_041	1	41.0048
C1_042	1	41.6281
C1_043	1	41.9936
C1_044	1	43.1853
C1_045	1	43.4719
C1_046	1	43.5726
C1_047	1	44.8833
C1_048	1	45.9516
C1_049	1	46.8607
C1_050	1	47.5643
C1_051	1	49.2183
C1_052	1	50.0001
C1_053	1	50.7509
C1_054	1	51.041
C1_055	1	51.7221
C1_056	1	52.1719
C1_057	1	52.3333
C1_058	1	52.9236
C1_059	1	53.2094
C1_060	1	53.5062
C1_061	1	54.0821
C1_062	1	54.9767
C1_063	1	55.0524
C1_064	1	55.116
C1_065	1	55.1982
C1_066	1	55.5313
C1_067	1	56.2588
C1_068	1	56.7228
C1_069	1	57.3331
C1_070	1	57.5652
C1_071	1	57.7739
C1_072	1	57.8513
C1_073	1	58.2662
C1_074	1	59.7213
C1_075	1	60.804
C1_076	1	62.0237
C1_077	1	62.6883
C1_078	1	64.2463
C1_079	1	65.5998
C1_080	1	66.0923
C1_081	1	66.4045
C1_082	1	67.8957
C1_083	1	72.5201
C1_084	1	76.7176
C1_085	1	78.5535
C1_086	1	79.3088
C1_087	1	80.0421
C1_088	1	80.5285
C1_089	1	80.9628
C1_090	1	81.6186
C1_091	1	81.718
C1_092	1	82.565
C1_093	1	84.4541
C1_094	1	84.5723
C1_095	1	84.6781
C1_096	1	84.9199
C1_097	1	85.5402
C1_098	1	87.1255
C1_099	1	87.9531
C1_100	1	88.1878
C1_101	1	88.3528
C1_102	1	89.4937
C1_103	1	90.5026
C1_104	1	91.8385
C1_105	1	94.2553
C1_106	1	94.7673
C1_107	1	95.0631
C1_108	1	95.3636
C1_109	1	95.4397
C1_110	1	95.5254
C1_111	1	96.5738
C1_112	1	97.4228
C1_113	1	98.02
C1_114	1	98.6768
C1_115	1	100.801
C1_116	1	102.555
C1_117	1	103.98
C1_118	1	105.97
C1_119	1	106.455
C1_120	1	107.812
C1_121	1	108.723
C1_122	1	111.156
C1_123	1	113.519
C1_124	1	113.906
C1_125	1	114.162
C1_126	1	114.635
C1_127	1	115.119
C1_128	1	116.805
C1_129	1	117.378
C1_130	1	117.457
C1_131	1	117.986
C1_132	1	119.247
C1_133	1	120.21
C1_134	1	120.293
C1_135	1	120.736
C1_136	1	121.545
C1_137	1	121.743
C1_138	1	122.509
C1_139	1	122.771
C1_140	1	123.191
C1_141	1	123.267
C1_142	1	123.358
C1_143	1	123.579
C1_144	1	124.067
C1_145	1	124.841
C1_146	1	127.06
C1_147	1	127.151
C1_148	1	127.985
C1_149	1	129.004
C1_150	1	129.07
C1_151	1	129.366
C1_152	1	129.404
C1_153	1	129.731
C1_154	1	130.225
C1_155	1	131.39
C1_156	1	132.388
C1_157	1	133.677
C1_158	1	133.936
C1_159	1	134.272
C1_160	1	135.2
C1_161	1	137.311
C1_162	1	139.787
C1_163	1	140.352
C1_164	1	141.233
C1_165	1	144.011
C1_166	1	145.282
C1_167	1	145.938
C1_168	1	147.325
C1_169	1	147.574
C1_170	1	147.829
C1_171	1	149.013
C1_172	1	150.324
C2_001	2	1.23432
C2_002	2	1.6856
C2_003	2	1.78449
C2_004	2	1.92986
C2_005	2	2.26167
C2_006	2	2.37607
C2_007	2	2.47657
C2_008	2	2.65896
C2_009	2	3.50864
C2_010	2	4.72921
C2_011	2	5.74464
C2_012	2	6.15977
C2_013	2	7.74732
C2_014	2	8.98996
C2_015	2	9.85262
C2_016	2	10.1953
C2_017	2	11.4841
C2_018	2	11.5668
C2_019	2	13.3735
C2_020	2	16.1562
C2_021	2	22.1331
C2_022	2	24.6749
C2_023	2	25.058
C2_024	2	26.2018
C2_025	2	26.8664
C2_026	2	27.4061
C2_027	2	28.7924
C2_028	2	29.2219
C2_029	2	30.2261
C2_030	2	31.0304
C2_031	2	31.1696
C2_032	2	31.2176
C2_033	2	31.6049
C2_034	2	31.9352
C2_035	2	32.5693
C2_036	2	33.1104
C2_037	2	33.29
C2_038	2	33.3702
C2_039	2	34.1021
C2_040	2	34.5351
C2_041	2	35.1238
C2_042	2	35.6041
C2_043	2	35.8737
C2_044	2	36.2948
C2_045	2	36.7563
C2_046	2	38.1886
C2_047	2	40.0767
C2_048	2	40.9741
C2_049	2	41.4816
C2_050	2	42.9771
C2_051	2	45.7118
C2_052	2	46.652
C2_053	2	46.9882
C2_054	2	47.6456
C2_055	2	49.3826
C2_056	2	50.6168
C2_057	2	50.6415
C2_058	2	50.8167
C2_059	2	51.0909
C2_060	2	51.4801
C2_061	2	52.3128
C2_062	2	53.2217
C2_063	2	54.0582
C2_064	2	54.9922
C2_065	2	55.132
C2_066	2	55.5524
C2_067	2	56.1453
C2_068	2	57.5302
C2_069	2	58.2816
C2_070	2	58.8435
C2_071	2	59.4947
C2_072	2	60.4135
C2_073	2	60.5618
C2_074	2	60.6288
C2_075	2	62.0389
C2_076	2	63.3971
C2_077	2	64.2509
C2_078	2	64.7353
C2_079	2	65.3311
C2_080	2	66.7889
C2_081	2	68.4705
C2_082	2	69.6197
C2_083	2	70.7977
C2_084	2	72.1557
C2_085	2	74.4503
C2_086	2	75.7408
C2_087	2	75.9455
C2_088	2	76.3914
C2_089	2	76.5828
C2_090	2	77.2588
C2_091	2	77.5911
C2_092	2	78.9491
C2_093	2	80.1485
C2_094	2	80.5182
C2_095	2	81.6619
C2_096	2	84.0899
C2_097	2	85.755
C2_098	2	87.7546
C2_099	2	90.7494
C2_100	2	91.7346
C2_101	2	92.4898
C2_102	2	93.0015
C2_103	2	93.6106
C2_104	2	94.3068
C2_105	2	95.4956
C2_106	2	97.3741
C3_001	3	0.96181
C3_002	3	1.70084
C3_003	3	3.01931
C3_004	3	4.04112
C3_005	3	4.51659
C3_006	3	5.39666
C3_007	3	6.30599
C3_008	3	6.78895
C3_009	3	6.93912
C3_010	3	7.34055
C3_011	3	7.56292
C3_012	3	8.75992
C3_013	3	13.3871
C3_014	3	15.791
C3_015	3	16.9564
C3_016	3	17.2498
C3_017	3	17.7583
C3_018	3	17.8089
C3_019	3	18.3171
C3_020	3	19.4333
C3_021	3	21.9569
C3_022	3	23.4311
C3_023	3	24.6147
C3_024	3	25.1602
C3_025	3	27.1984
C3_026	3	28.099
C3_027	3	28.5064
C3_028	3	29.6836
C3_029	3	30.8478
C3_030	3	32.0869
C3_031	3	32.5352
C3_032	3	33.7762
C3_033	3	34.1178
C3_034	3	34.5288
C3_035	3	35.6025
C3_036	3	35.9342
C3_037	3	38.0338
C3_038	3	39.6539
C3_039	3	39.9962
C3_040	3	40.1705
C3_041	3	40.3506
C3_042	3	40.6983
C3_043	3	41.1129
C3_044	3	41.113
C3_045	3	41.7248
C3_046	3	43.0609
C3_047	3	44.1628
C3_048	3	45.0587
C3_049	3	45.8432
C3_050	3	46.1874
C3_051	3	46.4438
C3_052	3	46.5451
C3_053	3	46.594
C3_054	3	46.9113
C3_055	3	47.2983
C3_056	3	48.0656
C3_057	3	48.3952
C3_058	3	48.5666
C3_059	3	48.7419
C3_060	3	49.0286
C3_061	3	50.0566
C3_062	3	50.7557
C3_063	3	50.9802
C3_064	3	51.5443
C3_065	3	52.1875
C3_066	3	52.633
C3_067	3	53.1536
C3_068	3	53.192
C3_069	3	54.1987
C3_070	3	55.3554
C3_071	3	56.9201
C3_072	3	58.6062
C3_073	3	58.6721
C3_074	3	59.8293
C3_075	3	62.3889
C3_076	3	66.9144
C3_077	3	76.4238
C3_078	3	78.9158
C3_079	3	79.8082
C3_080	3	80.8476
C3_081	3	82.2529
C3_082	3	83.1469
C3_083	3	83.3066
C3_084	3	85.167
C3_085	3	85.7007
C3_086	3	86.6926
C3_087	3	87.9328
C3_088	3	88.2806
C3_089	3	88.8296
C3_090	3	89.5743
C3_091	3	90.1721
C3_092	3	90.2329
C3_093	3	90.5873
C3_094	3	91.1445
C3_095	3	91.5038
C3_096	3	91.7921
C3_097	3	92.5674
C3_098	3	92.6992
C3_099	3	93.6179
C3_100	3	94.506
C3_101	3	95.2311
C3_102	3	97.3935
C3_103	3	97.6864
C3_104	3	98.1339
C3_105	3	100.115
C3_106	3	102.197
C3_107	3	105.3
C3_108	3	108.692
C3_109	3	109.17
C3_110	3	109.773
C3_111	3	111.654
C3_112	3	112.654
C3_113	3	113.164
C3_114	3	113.627
C3_115	3	114.736
C3_116	3	114.828
C3_117	3	114.946
C3_118	3	115.119
C3_119	3	115.434
C3_120	3	116.722
C4_001	4	0.62067
C4_002	4	1.08477
C4_003	4	1.33089
C4_004	4	2.11775
C4_005	4	2.57978
C4_006	4	3.47936
C4_007	4	3.51979
C4_008	4	4.11946
C4_009	4	5.19028
C4_010	4	5.94366
C4_011	4	7.1977
C4_012	4	7.73156
C4_013	4	10.7122
C4_014	4	17.7899
C4_015	4	20.2923
C4_016	4	21.6759
C4_017	4	21.7677
C4_018	4	22.1487
C4_019	4	22.9059
C4_020	4	23.4712
C4_021	4	23.7143
C4_022	4	24.5321
C4_023	4	24.6861
C4_024	4	25.1882
C4_025	4	25.4497
C4_026	4	25.6207
C4_027	4	25.9664
C4_028	4	26.1857
C4_029	4	26.402
C4_030	4	27.1794
C4_031	4	28.0352
C4_032	4	28.6339
C4_033	4	28.8543
C4_034	4	28.9619
C4_035	4	29.116
C4_036	4	29.6461
C4_037	4	29.6574
C4_038	4	30.3006
C4_039	4	31.2079
C4_040	4	31.5057
C4_041	4	32.237
C4_042	4	32.3376
C4_043	4	32.488
C4_044	4	32.9235
C4_045	4	33.11
C4_046	4	33.9004
C4_047	4	34.1745
C4_048	4	34.4264
C4_049	4	34.4964
C4_050	4	34.8665
C4_051	4	35.3296
C4_052	4	36.012
C4_053	4	36.4139
C4_054	4	37.2931
C4_055	4	38.5449
C4_056	4	38.9489
C4_057	4	39.1091
C4_058	4	39.3385
C4_059	4	40.1161
C4_060	4	40.2788
C4_061	4	40.6714
C4_062	4	42.1662
C4_063	4	43.5885
C4_064	4	44.4687
C4_065	4	44.6191
C4_066	4	47.8758
C4_067	4	49.7498
C4_068	4	51.8234
C4_069	4	52.2547
C4_070	4	52.692
C4_071	4	52.7387
C4_072	4	53.0278
C4_073	4	53.1483
C4_074	4	53.7483
C4_075	4	54.5119
C4_076	4	55.2097
C4_077	4	55.4228
C4_078	4	55.6219
C4_079	4	57.1481
C4_080	4	57.797
C4_081	4	57.9418
C4_082	4	58.9257
C4_083	4	59.341
C4_084	4	59.7306
C4_085	4	61.5661
C4_086	4	63.2853
C4_087	4	64.2442
C4_088	4	66.2156
C4_089	4	67.376
C4_090	4	68.1566
C4_091	4	70.4081
C4_092	4	71.2215
C4_093	4	71.4862
C4_094	4	72.4207
C4_095	4	74.2677
C4_096	4	76.0944
C4_097	4	77.909
C4_098	4	78.332
C4_099	4	79.3567
C4_100	4	79.4873
C4_101	4	79.8482
C4_102	4	80.3177
C4_103	4	80.8473
C4_104	4	80.8788
C4_105	4	81.249
C4_106	4	82.6252
C4_107	4	83.4145
C4_108	4	84.3523
C4_109	4	84.5122
C4_110	4	85.2284
C4_111	4	86.8499
C5_001	5	0.265085
C5_002	5	1.55724
C5_003	5	1.84686
C5_004	5	2.10381
C5_005	5	3.34403
C5_006	5	3.63659
C5_007	5	4.06175
C5_008	5	5.08309
C5_009	5	6.06545
C5_010	5	6.78914
C5_011	5	6.99974
C5_012	5	7.34333
C5_013	5	7.49909
C5_014	5	8.14944
C5_015	5	8.84042
C5_016	5	11.0334
C5_017	5	12.5804
C5_018	5	13.9117
C5_019	5	15.0408
C5_020	5	16.0027
C5_021	5	16.7749
C5_022	5	17.1991
C5_023	5	18.5678
C5_024	5	20.4218
C5_025	5	21.7933
C5_026	5	23.5995
C5_027	5	23.9783
C5_028	5	24.1713
C5_029	5	24.8434
C5_030	5	25.1728
C5_031	5	25.9478
C5_032	5	26.4686
C5_033	5	29.5539
C5_034	5	31.8628
C5_035	5	32.7167
C5_036	5	32.9452
C5_037	5	34.2512
C5_038	5	35.1462
C5_039	5	35.3764
C5_040	5	35.9101
C5_041	5	35.9703
C5_042	5	36.0287
C5_043	5	36.8805
C5_044	5	37.1147
C5_045	5	37.2602
C5_046	5	38.9214
C5_047	5	39.5471
C5_048	5	39.819
C5_049	5	39.9984
C5_050	5	40.0992
C5_051	5	40.1738
C5_052	5	40.3719
C5_053	5	41.666
C5_054	5	42.9619
C5_055	5	43.0648
C5_056	5	43.6285
C5_057	5	43.9122
C5_058	5	44.0451
C5_059	5	44.0633
C5_060	5	44.2149
C5_061	5	45.0678
C5_062	5	45.1069
C5_063	5	45.5738
C5_064	5	46.0255
C5_065	5	46.615
C5_066	5	46.6457
C5_067	5	46.9021
C5_068	5	47.4348
C5_069	5	47.5373
C5_070	5	48.0411
C5_071	5	48.6558
C5_072	5	49.0652
C5_073	5	49.3077
C5_074	5	49.5761
C5_075	5	49.8363
C5_076	5	49.9742
C5_077	5	50.7495
C5_078	5	51.0907
C5_079	5	52.6828
C5_080	5	61.5547
C5_081	5	65.2636
C5_082	5	66.0234
C5_083	5	67.0862
C5_084	5	68.5384
C5_085	5	69.0325
C5_086	5	69.849
C5_087	5	71.1752
C5_088	5	71.2807
C5_089	5	71.4221
C5_090	5	72.2112
C5_091	5	72.4939
C5_092	5	73.0901
C5_093	5	73.2841
C5_094	5	74.0819
C5_095	5	74.9908
C5_096	5	75.8711
C5_097	5	77.1007
C5_098	5	77.3956
C5_099	5	78.2611
C5_100	5	79.4995
C5_101	5	79.7052
C5_102	5	79.7987
C5_103	5	80.9133
C5_104	5	81.5144
C5_105	5	81.577
C5_106	5	82.2789
C5_107	5	83.3002
C5_108	5	83.4731
C5_109	5	83.8432
C5_110	5	84.4561
C5_111	5	85.0584
C5_112	5	85.8868
C5_113	5	87.0048
C5_114	5	87.6506
C5_115	5	88.0032
C5_116	5	88.2726
C5_117	5	88.7395
C5_118	5	89.5289
C5_119	5	90.2194
C5_120	5	92.0875
C5_121	5	92.9616
C5_122	5	94.104
C5_123	5	94.5417
C5_124	5	96.1822
C5_125	5	97.1721
C5_126	5	97.4135
C5_127	5	97.7587
C5_128	5	98.3972
C5_129	5	98.8159
C5_130	5	99.8265
C5_131	5	100.534
C5_132	5	102.033
C5_133	5	103.661
C5_134	5	106.123
C5_135	5	107.123
C5_136	5	107.787
C5_137	5	108.232
C5_138	5	108.782
C5_139	5	109.004
C5_140	5	109.509
C5_141	5	109.731
C5_142	5	111.311
C5_143	5	112.693
C5_144	5	112.77
C5_145	5	113.498
C5_146	5	113.88
C5_147	5	116.305
C5_148	5	117.34
C5_149	5	117.84
C5_150	5	118.765
C5_151	5	122.187
C5_152	5	122.246
C5_153	5	123.968
C5_154	5	125.016
C5_155	5	125.905
C5_156	5	127.024
C5_157	5	127.384
C5_158	5	127.404
C5_159	5	127.944
C5_160	5	128.955
C5_161	5	129.406
C5_162	5	129.849
C5_163	5	129.91
C5_164	5	130.361
C5_165	5	130.692
C5_166	5	131.569
C5_167	5	132.966

## Sheet: Table S7 NILs Chr2 & Chr5
	AT002	AT024	AT034	AT036	AT037	AT038	AT040	AT041	AT042	AT045	AT046	AT047	AT049	AT050	AT052	AT053	AT055	AT056	AT057	AT058	AT059	AT061	AT064	AT078	AT087	AT090	AT095	AT110	AT113	AT115	AT116	AT118	AT120	AT121	AT122	AT124	AT125	AT127	AT128	AT130	AT131	AT133	AT135	AT137	AT139	AT141	AT143	AT145	AT147
Col-WT	A	A	A	A	A	A	A	A	A	A	A	A	A	A	A	A	A	A	A	A	A	A	A	A	A	A	A	A	A	A	A	A	A	A	A	A	A	A	A	A	A	A	A	A	A	A	A	A	A
Ler-WT	B	B	B	B	B	B	B	B	B	B	B	B	B	B	B	B	B	B	B	B	B	B	B	B	B	B	B	B	B	B	B	B	B	B	B	B	B	B	B	B	B	B	B	B	B	B	B	B	B
CxL_01	A	A	A	A	A	A	A	A	A	A	A	A	A	A	A	A	A	A	A	A	A	A	A	A	A	A	A	A	A	A	A	A	A	A	A	A	A	A	A	A	A	A	A	A	A	A	A	A	A
CxL_02	A	A	A	A	A	A	A	A	A	A	A	A	A	A	A	A	A	A	A	A	A	A	A	A	A	A	A	A	B	B	B	B	B	B	B	B	B	B	B	B	B	B	B	B	B	B	B	B	B
CxL_09	A	A	A	B	B	B	B	B	B	B	B	B	B	B	B	B	B	B	B	B	B	B	A	A	A	A	A	A	A	A	A	A	A	A	A	A	A	A	A	A	A	A	A	A	A	A	A	A	A
CxL_24	B	B	B	A	A	A	A	A	A	A	A	A	A	A	A	A	A	A	A	A	A	A	B	B	B	B	B	B	B	B	B	B	B	B	B	B	B	B	B	B	B	B	B	B	B	B	B	B	B
CxL_31	B	B	B	B	B	B	B	B	B	B	B	B	B	B	B	B	B	B	B	B	B	B	B	B	B	B	B	B	A	A	A	A	A	A	A	A	A	A	A	A	A	A	A	A	A	A	A	A	A
CxL_32	B	B	B	B	B	B	B	B	B	B	B	B	B	B	B	B	B	B	B	B	B	B	B	B	B	B	B	B	B	B	B	B	B	B	B	B	B	B	B	B	B	B	B	B	B	B	B	B	B
C2L-002	B	B	B			A	A	B	B	B	B	B	B	B	B	B	B	B	B	B	B	B	B	B	B	B	B	B	B									B
C2L-003	B	B	B			B	B	B	B	B	B	B	B	B	B	B	B	B	B	B	B	B	B	B	B	B	B	B	B									B
C2L-005	B	B	B			A	A	A	A	A	A	A	A	A	A	A	A	A	A	A	A	A	B	B	B	B	B	B	B									B
C2L-009	B	B	B			A	A	A	A	A	A	A	B	B	B	B	B	B	B	B	B	B	B	B	B	B	B	B	B									B
C2L-010	B	B	B			A	A	A	A	B	B	B	B	B	B	B	B	B	B	B	B	B	B	B	B	B	B	B	B									B
C2L-014	B	B	B			A	A	A	A	A	A	A	A	B	B	B	B	B	B	B	B	B	B	B	B	B	B	B	B									B
C2L-016	B	B	B			A	A	A	A	A	A	A	A	A	A	A	A	A	A	A	B	B	B	B	B	B	B	B	B									B
C2L-017	B	B	B			A	A	A	A	A	A	A	B	B	B	B	B	B	B	B	B	B	B	B	B	B	B	B	B									B
C2L-018	B	B	B			B	A	A	A	A	A	A	A	A	A	A	A	A	A	A	A	A	B	B	B	B	B	B	B									B
C2L-019	B	B	B			A	A	B	B	B	B	B	B	B	B	B	B	B	B	B	B	A	B	B	B	B	B	B	B									B
C2L-021	B	B	B			B	A	A	A	A	A	A	A	A	A	A	A	A	A	A	A	A	B	B	B	B	B	B	B									B
C2L-036	B	B	B			A	A	A	A	B	B	B	B	B	B	B	B	B	B	A	A	A	B	B	B	B	B	B	B									B
C2L-039	B	B	B			A	A	A	A	A	B	B	B	B	B	B	B	B	B	B	B	A	B	B	B	B	B	B	B									B
C2L-042	B	B	B			B	B	A	A	A	A	A	A	A	A	A	A	A	A	A	A	B	B	B	B	B	B	B	B									B
C2L-047	B	B	B			B	B	B	A	A	A	A	A	A	A	A	A	A	A	A	A	A	B	B	B	B	B	B	B									B
C2L-052	B	B	B			B	B	B	B	B	B	B	B	B	B	B	A	A	A	A	A	A	B	B	B	B	B	B	B									B
C2L-056	B	B	B			B	B	A	A	A	A	A	A	A	B	B	B	B	B	B	B	B	B	B	B	B	B	B	B									B
C2L-057	B	B	B			B	B	B	B	B	A	A	A	A	A	A	A	A	A	A	A	A	B	B	B	B	B	B	B									B
C2L-059	B	B	B			B	B	B	B	A	A	A	A	A	A	A	A	A	A	B	B	B	B	B	B	B	B	B	B									B
C2L-062	B	B	B			A	A	A	A	A	B	B	B	B	B	B	B	B	B	A	A	A	B	B	B	B	B	B	B									B
C2L-064	B	B	B			B	B	B	B	B	B	B	A	A	A	A	A	A	A	A	A	A	B	B	B	B	B	B	B									B
C2L-066	B	B	B			A	A	B	B	B	B	B	B	B	B	B	B	B	B	A	A	A	B	B	B	B	B	B	B									B
C2L-072	B	B	B			B	B	B	B	B	B	B	B	B	B	B	B	B	B	A	A	A	B	B	B	B	B	B	B									B
C2L-076	B	B	B			A	A	A	A	A	A	A	A	A	A	A	A	A	A	B	B	B	B	B	B	B	B	B	B									B
C2L-077	B	B	B			B	B	B	B	B	B	B	B	B	B	B	B	B	B	B	B	A	B	B	B	B	B	B	B									B
C2L-080	B	B	B			A	A	A	A	B	B	B	B	B	B	B	B	B	B	B	B	B	B	B	B	B	B	B	B									B
C2L-082	B	B	B			A	A	A	B	B	B	B	B	B	B	B	B	B	B	B	B	B	B	B	B	B	B	B	B									B
C2L-086	B	B	B		A	A	A	A	A	A	A	A	A	A	A	A	A	B	B	B	B	B	B	B	B	B	B	B	B									B
C2L-088	B	B	B		B	B	B	B	B	B	B	B	B	B	B	B	B	A	A	A	A	A	B	B	B	B	B	B	B									B
C2L-094	B	B	B		B	B	B	B	B	B	B	A	A	A	A	A	A	B	B	B	B	B	B	B	B	B	B	B	B									B
C2L-095	B	B	B		A	A	A	A	A	B	B	B	B	B	B	B	B	B	B	B	B	A	B	B	B	B	B	B	B									B
C2L-097	B	B	B		A		B	B	B	B	B	B	B	B	B	B	B	B	B	B	B	B	B	B	B	B	B	B	B									B
C2L-098	B	B	B		B	B	B	A	A	A	A	A	A	A	A	A	A	A	A	A	A	A	B	B	B	B	B	B	B									B
C2L-100	B	B	B		B	B	B	B	B	B	B	A	A	A	A	A	A	A	A	A	A	A	B	B	B	B	B	B	B									B
C2L-102	B	B	B		B	B	B	B	B	B	B	B	B	B	A	A	A	A	A	A	A	A	B	B	B	B	B	B	B									B
C2L-104	B	B	B		A	A	A	A	A	A	A	A	A	A	A	A	B	B	B	B	B	B	B	B	B	B	B	B	B									B
C2L-105	B	B	B		A		B	B	B	B	B	B	B	B	B	B	B	B	B	B	B	B	B	B	B	B	B	B	B									B
C2L-109	B	B	B		A	A	A	A	A	A	A	A	A	A	A	A	A	A	A	A	A	B	B	B	B	B	B	B	B									B
C2L-117	B	B	B		A	A	A	A	A	A	A	B	B	B	B	B	B	B	B	B	B	B	B	B	B	B	B	B	B									B
C5L-001	B	B	B	B			B															B	B	B	B	B	B	B	A	A	A	B	B	B	B	B	B		B	A	A	A	A	A	A	A	A	A	A
C5L-002	B	B	B	B			B															B	B	B	B	B	B	B	B	B	B	B	A	A	A	A	A		A	A	A	A	A	A	A	A	A	A	A
C5L-003	B	B	B	B			B															B	B	B	B	B	B	B	B	B	B	B	B	B	B	B	B		B	B	B	B	B	B	B	B	B	A	A
C5L-004	B	B	B	B			B															B	B	B	B	B	B	B	B	A	A	A	A	A	A	A	B		B	B	B	B	B	B	B	B	B	B	B
C5L-006	B	B	B	B			B															B	B	B	B	B	B	B	B	B	B	B	B	B	B	B	A		A	A	A	A	A	A	A	A	A	A	A
C5L-008	B	B	B	B			B															B	B	B	B	B	B	B	A	A	A	A	A	A	B	B	B		B	B	B	B	B	B	B	B	B	A	A
C5L-009	B	B	B	B			B															B	B	B	B	B	B	B	A	A	A	A	A	A	A	A	A		A	A	B	B	B	B	B	B	B	B	B
C5L-014	B	B	B	B			B															B	B	B	B	B	B	B	B	B	B	B	B	B	B	B	B		B	B	B	B	B	B	A	A	A	A	A
C5L-018	B	B	B	B			B															B	B	B	B	B	B	B	B	B	B	B	B	B	B	B	B		B	B	B	B	B	B	B	B	B	B	B
C5L-021	B	B	B	B			B															B	B	B	B	B	B	B	B	B	B	B	B	B	B	B	B		B	B	B	B	B	A	A	A	A	A	A
C5L-024	B	B	B	B			B															B	B	B	B	B	B	B	A	A	A	A	A	A	A	B	B		B	B	B	B	B	B	B	B	B	A	A
C5L-025	B	B	B	B			B															B	B	B	B	B	B	B	A	A	A	A	A	A	A	A	A		A	A	A	A	A	A	A	A	A	B	B
C5L-026	B	B	B	B			B															B	B	B	B	B	B	B	A	A	A	A	A	A	B	B	B		B	B	B	B	B	B	B	B	B	B	B
C5L-027	B	B	B	B			B															B	B	B	B	B	B	B	A	A	B	B	B	B	B	A	A		A	A	A	A	A	A	A	A	A	A	A
C5L-028	B	B	B	B			B															B	B	B	B	B	B	B	A	A	A	A	A	A	A	A	A		A	A	A	A	A	A	A	A	A	A	A
C5L-029	B	B	B	B			B															B	B	B	B	B	B	B	A	A	A	A	A	A	A	B	B		B	B	B	B	B	B	B	B	A	A	A
C5L-031	B	B	B	B			B															B	B	B	B	B	B	B	B	B	B	B	B	B	A	A	A		A	A	A	A	A	A	A	A	A	A	A
C5L-033	B	B	B	B			B															B	B	B	B	B	B	B	A	A	A	A	A	A	A	A	A		A	A	A	A	A	A	A	A	A	B	B
C5L-035	B	B	B	B			B															B	B	B	B	B	B	B	B	B	B	B	B	B	B	B	B		B	B	B	B	B	B	B	B	B	A	A
C5L-037	B	B	B	B			B															B	B	B	B	B	B	B	A	A	A	A	A	A	A	A	A		A	A	A	A	A	B	B	B	B	B	A
C5L-038	B	B	B	B			B															B	B	B	B	B	B	B	A	A	A	A	A	A	A	A	A		A	A	A	A	A	A	A	A	A	A	A
C5L-042	B	B	B	B			B															B	B	B	B	B	B	B	A	A	A	A	A	A	A	A	A		A	A	B	B	B	B	B	B	B	B	B
C5L-044	B	B	B	B			B															B	B	B	B	B	B	B	B	B	B	B	B	B	B	A	A		A	A	A	A	A	A	A	A	A	A	A
C5L-045	B	B	B	B			B															B	B	B	B	B	B	B	A	A	A	A	A	A	A	A	A		A	A	B	B	B	B	B	B	B	B	B
C5L-046	B	B	B	B			B															B	B	B	B	B	B	B	A	A	A	A	A	A	A	A	A		A	A	A	A	A	A	A	A	A	A	B
C5L-047	B	B	B	B			B															B	B	B	B	B	B	B	B	B	B	B	B	B	B	B	B		B	B	A	A	A	A	A	B	B	B	B
C5L-048	B	B	B	B			B															B	B	B	B	B	B	B	A	B	B	B	B	B	B	B	B		B	A	A	A	A	A	A	A	A	A	A
C5L-050	B	B	B	B			B															B	B	B	B	B	B	B	A	A	A	A	A	A	A	B	B		B	B	B	B	B	B	B	B	A	A	A
C5L-053	B	B	B	B			B															B	B	B	B	B	B	B	A	B	B	B	B	B	B	B	B		B	B	B	B	B	B	B	B	B	B	B
C5L-055	B	B	B	B			B															B	B	B	B	B	B	B	B	B	B	A	A	A	A	A	A		A	A	A	A	A	A	A	A	A	A	A
C5L-056	B	B	B	B			B															B	B	B	B	B	B	B	B	B	B	B	B	B	B	B	B		B	B	B	B	B	B	B	B	B	B	B
C5L-057	B	B	B	B			B															B	B	B	B	B	B	B	A	A	A	A	A	A	A	B	B		B	B	B	B	B	B	B	B	B	B	A
C5L-059	B	B	B	B			B															B	B	B	B	B	B	B	B	B	A	A	A	A	A	A	A		A	B	B	B	B	B	B	B	B	B	A
C5L-060	B	B	B	B			B															B	B	B	B	B	B	B	A	A	B	B	B	B	B	B	B		B	B	B	A	A	A	A	A	A	A	A
C5L-061	B	B	B	B			B															B	B	B	B	B	B	B	A	B	B	B	B	B	B	B	B		B	B	B	B	B	B	B	B	A	A	A
C5L-063	B	B	B	B			B															B	B	B	B	B	B	B	B	B	B	B	A	A	A	A	A		A	A	B	B	B	B	B	B	B	B	B
C5L-064	B	B	B	B			B															B	B	B	B	B	B	B	A	A	B	B	B	B	B	B	B		B	B	B	A	A	A	A	A	A	A	A
C5L-066	B	B	B	B			B															B	B	B	B	B	B	B	A	A	A	A	A	A	A	B	B		B	B	B	B	B	A	A	A	A	A	A
C5L-067	B	B	B	B			B															B	B	B	B	B	B	B	B	A	A	A	A	A	A	A	A		A	A	A	A	A	A	A	A	B	B	A
C5L-068	B	B	B	B			B															B	B	B	B	B	B	B	A	A	A	A	B	B	B	B	B		B	B	B	B	B	B	B	B	B	B	B
C5L-069	B	B	B	B			B															B	B	B	B	B	B	B	B	A	A	A	A	A	A	A	A		A	A	A	A	A	A	A	A	A	A	A
C5L-071	B	B	B	B			B															B	B	B	B	B	B	B	B	B	A	A	A	A	A	A	A		A	A	A	A	A	A	A	A	A	A	A
C5L-072	B	B	B	B			B															B	B	B	B	B	B	B	B	A	A	A	A	A	A	A	A		A	A	A	A	A	A	A	A	A	A	A
C5L-073	B	B	B	B			B															B	B	B	B	B	B	B	B	B	B	B	B	B	B	B	B		B	B	B	A	A	A	A	A	A	A	A
C5L-074	B	B	B	B			B															B	B	B	B	B	B	B	B	A	A	A	A	A	A	A	A		A	A	A	A	A	A	A	A	A	A	A
C5L-077	B	B	B	B			B															B	B	B	B	B	B	B	B	B	B	B	B	B	B	B	B		B	B	B	B	B	A	A	A	A	A	A
C5L-080	B	B	B	B			B															B	B	B	B	B	B	B	A	A	A	A	B	B	B	B	B		B	B		B	B	B	B	B	B	A	A
C5L-081	B	B	B	B			B															B	B	B	B	B	B	B	A	A	A	B	B	B	B	B	B		B	B		A	A	A	A	A	A	A	A
C5L-082	B	B	B	B			B															B	B	B	B	B	B	B	A	A	A	A	A	A	A	A	A		A	A	B	B	B	B	B	B	B	B	B
C5L-083	B	B	B	B			B															B	B	B	B	B	B	B	A	A	A	A	A	A	A	A	A		A	A	A	A	A	A	A	A	A	A	A
C5L-085	B	B	B	B			B															B	B	B	B	B	B	B	A	A	A	A	A	A	A	A	A		A	A	A	A	A	A	B	B	B	B	B
L2C-001	A	A	A	A	A	B	B	B	B	B	B	B	B	B	B	B	B	B	B	B	B	B	A	A	A	A	A	A	A									A
L2C-002	A	A	A	B	B	B	B	B	B	B	B	B	B	B	B	B	A	A	A	A	A	A	A	A	A	A	A	A	A									A
L2C-003	A	A	A	A	A	A	A	A	A	A	A	A	A	A	A	A	A	A	A	A	A	A	A	A	A	A	A	A	A									A
L2C-005	A	A	A	A	A	A	A	A	A	B	B	B	B	B	B	B	B	B	B	B	B	B	A	A	A	A	A	A	A									A
L2C-006	A	A	A	A	A	A	A	B	B	B	B	B	B	B	A	A	A	A	A	A	A	A	A	A	A	A	A	A	A									A
L2C-007	A	A	A	A	A	A	A	B	B	B	B	B	B	B	B	B	B	B	B	B	B	B	A	A	A	A	A	A	A									A
L2C-011	A	A	A	A	A	A	A	A	A	A	A	A	A	B	B	B	B	B	B	B	B	B	A	A	A	A	A	A	A									A
L2C-013	A	A	A	B	B	B	B	B	B	B	B	B	B	B	B	B	B	A	A	A	A	A	A	A	A	A	A	A	A									A
L2C-018	A	A	A	A	A	A	A	A	A	B	B	B	B	B	B	B	B	B	B	B	B	B	A	A	A	A	A	A	A									A
L2C-019	A	A	A	B	B	B	B	B	B	B	B	B	B	B	B	B	B	B	B	B	B	A	A	A	A	A	A	A	A									A
L2C-020	A	A	A	B	B	B	B	B	B	B	B	B	B	B	B	B	B	B	B	B	B	B	A	A	A	A	A	A	A									A
L2C-023	A	A	A	A	A	A	A	A	A	A	A	A	A	A	A	A	A	A	A	A	A	B	A	A	A	A	A	A	A									A
L2C-028	A	A	A	A	A	A	B	B	B	B	B	A	A	A	A	A	A	A	A	A	A	A	A	A	A	A	A	A	A									A
L2C-030	A	A	A	B	B	B	A	A	A	A	B	B	B	B	B	B	B	B	B	B	B	B	A	A	A	A	A	A	A									A
L2C-031	A	A	A	B	B	A	A	A	A	A	A	B	B	B	B	B	B	B	B	B	B	B	A	A	A	A	A	A	A									A
L2C-032	A	A	A	B	B	B	B	B	B	B	B	B	B	B	B	B	B	B	B	A	A	A	A	A	A	A	A	A	A									A
L2C-036	A	A	A	B	B	B	B	B	B	A	A	A	A	A	A	A	A	A	A	A	A	A	A	A	A	A	A	A	A									A
L2C-040	A	A	A	A	A	B	B	B	B	B	B	B	B	B	B	B	B	B	B	B	B	A	A	A	A	A	A	A	A									A
L2C-041	A	A	A	A	A	B	B	B	B	B	B	B	B	B	B	B	A	A	A	A	A	A	A	A	A	A	A	A	A									A
L2C-044	A	A	A	B	B	A	A	A	A	A	A	A	A	A	A	A	A	A	A	A	A	A	A	A	A	A	A	A	A									A
L2C-045	A	A	A	A	A	A	A	A	B	B	B	B	B	B	B	B	B	B	B	B	B	A	A	A	A	A	A	A	A									A
L2C-052	A	A	A	A	A	A	A	A	A	A	A	A	A	A	A	A	A	A	A	B	B	B	A	A	A	A	A	A	A									A
L2C-063	A	A	A	A	A	A	B	B	B	B	A	A	A	A	A	A	A	A	B	B	B	B	A	A	A	A	A	A	A									A
L2C-073	A	A	A	A	A	A	A	A	A	A	A	A	A	A	A	A	A	B	B	B	B	B	A	A	A	A	A	A	A									A
L2C-074	A	A	A	B	B	B	B	B	B	A	A	A	A	A	A	A	A	A	A	B	B	B	A	A	A	A	A	A	A									A
L2C-079	A	A	A	B	B	A	A	A	A	A	A	A	A	A	A	A	B	B	B	B	B	B	A	A	A	A	A	A	A									A
L2C-081	A	A	A	B	A	A	A	A	A	A	A	A	A	A	A	A	A	A	A	B	B	B	A	A	A	A	A	A	A									A
L2C-084	A	A	A	B	B	B	B	B	B	B	A	A	A	A	A	A	A	A	A	B	B	B	A	A	A	A	A	A	A									A
L2C-087	A	A	A	B	B	B	A	A	A	A	A	A	A	A	A	A	A	B	B	B	B	B	A	A	A	A	A	A	A									A
L2C-097	A	A	A	A	A	A	A	A	A	A	A	A	A	A	B	B	B	B	B	B	B	B	A	A	A	A	A	A	A									A
L2C-098	A	A	A	A	A	A	A	A	A	A	A	A	A	A	A	A	B	B	B	B	B	B	A	A	A	A	A	A	A									A
L2C-099	A	A	A	A	A	B	B	B	B	A	A	A	A	A	A	A	A	B	B	B	B	B	A	A	A	A	A	A	A									A
L2C-102	A	A	A	B	B	B	B	A	A	A	A	A	A	A	A	A	A	A	A	A	A	A	A	A	A	A	A	A	A									A
L2C-106	A	A	A	A	B	B	B	B	B	B	B	B	B	B	B	B	B	B	B	B	B	B	A	A	A	A	A	A	A									A
L2C-114	A	A	A	B	B	B	B	B	B	B	B		A	A	A	A	A	A	B	A	B		A	A	A	A	A	A	A									A
L2C-117	A	A	A	A	A	A	A	A	A	A	A	B	B	B	B	B	A	A	A	A	A	A	A	A	A	A	A	A	A									A
L2C-118	A	A	A	B	B	B	B	B	B	B	B	A	A	A	A	A	A	A	A	B	B	B	A	A	A	A	A	A	A									A
L5C-001	A	A	A	A			A															A	A	A	A	A	A	A	B	B	B	B	B	B	A	A	A		A	B	B	B	B	B	A	A	A	A	A
L5C-002	A	A	A	A			A															A	A	A	A	A	A	A	A	A	A	A	A	B	B	B	B		B	B	B	B	B	B	B	B	B	B	B
L5C-003	A	A	A	A			A															A	A	A	A	A	A	A	B	B	B	B	B	B	B	B	B		B	B	B	B	B	B	B	B	B	B	B
L5C-004	A	A	A	A			A															A	A	A	A	A	A	A	A	B	B	B	B	B	B	B	B		B	A	A	A	A	A	A	A	A	A	A
L5C-005	A	A	A	A			A															A	A	A	A	A	A	A	B	B	B	B	B	B	B	B	B		B	B	B	B	B	B	B	B	B	B	B
L5C-007	A	A	A	A			A															A	A	A	A	A	A	A	B	B	B	B	B	B	B	B	A		A	A	A	A	A	A	A	A	A	A	A
L5C-008	A	A	A	A			A															A	A	A	A	A	A	A	A	A	A	A	A	A	A	A	A		A	A	A	A	A	A	A	A	B	B	B
L5C-013	A	A	A	A			A															A	A	A	A	A	A	A	B	B	B	B	B	B	B	B	B		B	B	A	A	A	A	A	A	A	A	A
L5C-014	A	A	A	A			A															A	A	A	A	A	A	A	A	A	A	B	B	B	B	B	B		B	B	B	B	B	B	B	B	B	B	B
L5C-015	A	A	A	A			A															A	A	A	A	A	A	A	B	B	A	A	A	A	A	A	A		A	A	A	A	A	A	A	A	A	A	A
L5C-016	A	A	A	A			A															A	A	A	A	A	A	A	A	A	A	A	A	A	A	A	A		A	A	A	A	A	A	A	A	A	A	A
L5C-017	A	A	A	A			A															A	A	A	A	A	A	A	B	B	B	B	B	B	A	A	A		A	A	A	A	A	B	B	B	B	B	B
L5C-018	A	A	A	A			A															A	A	A	A	A	A	A	A	B	B	B	B	B	B	B	B		B	B	B	B	B	B	B	B	B	B	B
L5C-019	A	A	A	A			A															A	A	A	A	A	A	A	B	B	B	B	B	B	B	B	B		B	B	B	B	B	B	B	B	B	B	B
L5C-020	A	A	A	A			A															A	A	A	A	A	A	A	B	B	B	B	B	B	B	B	B		B	B	B	B	B	B	B	A	A	A	A
L5C-023	A	A	A	A			A															A	A	A	A	A	A	A	A	A	A	A	A	A	A	B	B		B	B	B	B	B	B	B	B	B	B	B
L5C-025	A	A	A	A			A															A	A	A	A	A	A	A	A	A	A	A	A	A	A	A	A		A	A	B	B	B	B	B	B	B	B	B
L5C-026	A	A	A	A			A															A	A	A	A	A	A	A	A	A	A	A	A	A	A	A	A		A	B	B	B	B	B	B	B	B	B	B
L5C-027	A	A	A	A			A															A	A	A	A	A	A	A	A	B	B	B	B	B	B	B	B		B	A	A	A	A	A	A	A	A	A	A
L5C-028	A	A	A	A			A															A	A	A	A	A	A	A	A	A	A	A	A	A	A	B	B		B	B	B	B	B	B	B	B	B	B	B
L5C-031	A	A	A	A			A															A	A	A	A	A	A	A	A	A	A	B	B	B	B	B	B		B	B	B	B	B	B	B	B	B	B	B
L5C-034	A	A	A	A			A															A	A	A	A	A	A	A	A	A	A	A	A	A	A	A	A		B	B	B	B	B	B	B	B	B	B	B
L5C-037	A	A	A	A			A															A	A	A	A	A	A	A	A	A	A	A	A	A	A	A	A		A	A	A	A	A	A	A	A	A	A	A
L5C-039	A	A	A	A			A															A	A	A	A	A	A	A	B	B	B	B	B	B	B	B	B		B	B	B	B	A	A	A	A	A	A	A
L5C-040	A	A	A	A			A															A	A	A	A	A	A	A	B	B	B	B	B	B	B	B	B		B	B	B	B	B	B	B	B	B	A	A
L5C-041	A	A	A	A			A															A	A	A	A	A	A	A	A	A	A	A	A	A	A	A	A		A	A	A	A	A	A	A	A	A	A	A
L5C-044	A	A	A	A			A															A	A	A	A	A	A	A	A	A	A	A	A	B	B	B	B		B	B	B	B	B	B	B	B	A	A	A
L5C-046	A	A	A	A			A															A	A	A	A	A	A	A	B	B	B	B	B	B	B	A	A		A	A	A	A	A	A	A	A	A	A	A
L5C-047	A	A	A	A			A															A	A	A	A	A	A	A	B	B	B	B	B	B	B	B	B		B	B	A	A	A	A	A	A	A	A	A
L5C-048	A	A	A	A			A															A	A	A	A	A	A	A	B	A	A	A	A	A	A	A	A		A	B	B	B	B	B	B	B	B	B	B
L5C-050	A	A	A	A			A															A	A	A	A	A	A	A	A	A	A	B	B	B	B	B	B		B	B	B	B	B	B	B	B	B	B	B
L5C-051	A	A	A	A			A															A	A	A	A	A	A	A	A	A	A	A	A	A	A	A	A		A	A	A	A	A	A	A	A	A	B	B
L5C-054	A	A	A	A			A															A	A	A	A	A	A	A	A	B	B	B	B	B	B	B	B		B	B	B	B	B	B	B	B	B	A	A
L5C-056	A	A	A	A			A															A	A	A	A	A	A	A	A	A	A	A	A	A	A	A	A		A	A	A	A	A	A	B	B	B	B	B
L5C-058	A	A	A	A			A															A	A	A	A	A	A	A	A	B	B	B	B	B	B	B	B		B	B	A	A	A	A	A	A	A	A	A
L5C-062	A	A	A	A			A															A	A	A	A	A	A	A	A	A	A	A	A	A	B	B	B		B	B	B	B	B	B	B	B	B	B	B
L5C-065	A	A	A	A			A															A	A	A	A	A	A	A	B	B	B	B	B	B	B	B	B		B	B	B	B	B	B	A	A	A	A	A
L5C-066	A	A	A	A			A															A	A	A	A	A	A	A	A	A	A	B	A	A	A	A	A		B	B	B	B	B	B	B	B	B	B	A
L5C-073	A	A	A	A			A															A	A	A	A	A	A	A	A	A	A	A	A	A	B	B	B		B	B	B	B	B	B	B	B	B	B	A
L5C-075	A	A	A	A			A															A	A	A	A	A	A	A	A	A	A	A	A	A	A	A	A		A	B	B	B	B	B	B	B	B	B	B
L5C-076	A	A	A	A			A															A	A	A	A	A	A	A	A	A	A	A	A	A	A	B	B		B	B	B	B	B	B	B	A	A	A	A
L5C-077	A	A	A	A			A															A	A	A	A	A	A	A	A	A	A	A	A	A	A	A	B		B	B	B	B	B	B	B	B	B	B	B
L5C-081	A	A	A	A			A															A	A	A	A	A	A	A	B	B	B	B	B	B	B	B	B		B	B	B	B	B	A	A	A	A	A	A
L5C-082	A	A	A	A			A															A	A	A	A	A	A	A	A	A	A	A	B	B	B	B	B		B	B	B	B	B	B	B	B	B	B	B
L5C-086	A	A	A	A			A															A	A	A	A	A	A	A	A	A	A	A	A	B	B	B	B		B	B	B	B	B	B	B	B	B	B	B
[truncated: 4 more columns]

## Sheet: Table S8 Map NILs
Marker	Linkage group	Genetic position (cM)
AT002	1	2.96469
AT024	1	80.6428
AT034	1	146.966
AT036	1	0.342285
AT037	2	0.862345
AT038	2	9.17291
AT040	2	19.9726
AT041	2	31.5443
AT042	2	36.6455
AT045	2	45.4432
AT046	2	49.5152
AT047	2	59.9555
AT049	2	63.2836
AT050	2	65.257
AT052	2	69.0345
AT053	2	70.9257
AT055	2	77.4677
AT056	2	82.3604
AT057	2	84.2559
AT058	2	93.7651
AT059	2	94.2673
AT061	2	98.4707
AT064	2	2.90069
AT078	3	67.4592
AT087	3	117.217
AT090	3	0.05845
AT095	3	20.2019
AT110	4	92.4415
AT113	4	1.7121
AT115	5	8.78715
AT116	5	12.6004
AT118	5	20.2887
AT120	5	27.0734
AT121	5	28.9571
AT122	5	40.0035
AT124	5	48.4578
AT125	5	54.5528
AT128	5	68.4959
AT130	5	74.5139
AT131	5	82.5608
AT133	5	85.4932
AT135	5	89.5084
AT137	5	93.7145
AT139	5	98.7788
AT141	5	101.595
AT143	5	107.33
AT145	5	112.236
AT147	5	115.578
AT148	5	118.175
AT149	5	132.398
AT150	5	134.092

## Sheet: Table S9 Phenotypes RILs & CSL
Genotype	Population	Type	Nucleotype	Plasmotype	Block	X	Y	FT	MSL
CxL_11	2	CSL	CSL	Col	1	1	1	58	32
CxL_10	2	CSL	CSL	Col	1	1	2	46	63
CxL_23	2	CSL	CSL	Col	1	1	3	72	34
CxL_16	2	CSL	CSL	Col	1	1	4	48	42
CxL_17	2	CSL	CSL	Col	1	1	5	65	97
CxL_06	2	CSL	CSL	Col	1	1	6	51	70
CxL_14	2	CSL	CSL	Col	1	1	7	54	37
CS1934	1	RIL	RIL	Ler	1	1	8	58	22
CS1937	1	RIL	RIL	Ler	1	1	9	63	31
CxL_03	2	CSL	CSL	Col	1	1	10	62	43
CS1963	1	RIL	RIL	Ler	1	1	11	57	56
CxL_COL	2	WT	Col	Col	1	1	12	58	44
CxL_09	2	CSL	CSL	Col	1	2	1
CxL_03	2	CSL	CSL	Col	1	2	2	57	44
CS1966	1	RIL	RIL	Ler	1	2	3	68	46
CxL_29	2	CSL	CSL	Col	1	2	4
CS1972	1	RIL	RIL	Ler	1	2	5	60	26
CxL_14	2	CSL	CSL	Col	1	2	6	51	61
CS1989	1	RIL	RIL	Ler	1	2	7
CxL_32	2	CSL	Ler	Col	1	2	8	53	52
CS1977	1	RIL	RIL	Ler	1	2	9	53	44
CS1924	1	RIL	RIL	Ler	1	2	10	58	46
CxL_03	2	CSL	CSL	Col	1	2	11	59	45
CxL_02	2	CSL	CSL	Col	1	2	12	48	75
CS1929	1	RIL	RIL	Ler	1	3	1	58	58
CS1965	1	RIL	RIL	Ler	1	3	2	59	35
CS1939	1	RIL	RIL	Ler	1	3	3	58	23
CxL_30	2	CSL	CSL	Col	1	3	4	51	60
CS1912	1	RIL	RIL	Ler	1	3	5	56	21
CS1978	1	RIL	RIL	Ler	1	3	6	54	62
CS1935	1	RIL	RIL	Ler	1	3	7	53	33
CxL_08	2	CSL	CSL	Col	1	3	8	51	76
CS1921	1	RIL	RIL	Ler	1	3	9	58	23
CxL_LER	2	WT	Ler	Ler	1	3	10	57	65
CS1948	1	RIL	RIL	Ler	1	3	11	56	117
CxL_18	2	CSL	CSL	Col	1	3	12
CS1903	1	RIL	RIL	Ler	1	4	1	60	43
CS1901	1	RIL	RIL	Ler	1	4	2	57	69
CS1985	1	RIL	RIL	Ler	1	4	3	61	19
CS1907	1	RIL	RIL	Ler	1	4	4
CS1920	1	RIL	RIL	Ler	1	4	5	53	38
CxL_27	2	CSL	CSL	Col	1	4	6
CS1959	1	RIL	RIL	Ler	1	4	7
CxL_07	2	CSL	CSL	Col	1	4	8	66	31
CS1971	1	RIL	RIL	Ler	1	4	9	51	137
CS1918	1	RIL	RIL	Ler	1	4	10	56	25
CxL_24	2	CSL	CSL	Col	1	4	11	57	136
CS1970	1	RIL	RIL	Ler	1	4	12
CxL_11	2	CSL	CSL	Col	1	5	1	58	21
CxL_09	2	CSL	CSL	Col	1	5	2	53	33
CxL_31	2	CSL	CSL	Col	1	5	3	55	26
CxL_02	2	CSL	CSL	Col	1	5	4	49	49
CxL_10	2	CSL	CSL	Col	1	5	5	44	42
CxL_26	2	CSL	CSL	Col	1	5	6	48	33
CS933_COL	1	WT	Col	Col	1	5	7
CxL_32	2	CSL	Ler	Col	1	5	8	47	42
CS1974	1	RIL	RIL	Ler	1	5	9	51	27
CxL_27	2	CSL	CSL	Col	1	5	10
CS1975	1	RIL	RIL	Ler	1	5	11	56	28
CS1986	1	RIL	RIL	Ler	1	5	12	54	34
CS1997	1	RIL	RIL	Ler	1	6	1	54	46
CS1990	1	RIL	RIL	Ler	1	6	2	62	10
CxL_08	2	CSL	CSL	Col	1	6	3	46	140
CS1910	1	RIL	RIL	Ler	1	6	4	70	26
CxL_27	2	CSL	CSL	Col	1	6	5
CxL_19	2	CSL	CSL	Col	1	6	6	59	91
CxL_07	2	CSL	CSL	Col	1	6	7
CS1928	1	RIL	RIL	Ler	1	6	8	59	49
CxL_12	2	CSL	CSL	Col	1	6	9	43	54
CxL_26	2	CSL	CSL	Col	1	6	10	51	43
CxL_04	2	CSL	CSL	Col	1	6	11	45	75
CS1906	1	RIL	RIL	Ler	1	6	12	49	41
CxL_28	2	CSL	CSL	Col	1	7	1	50	54
CxL_03	2	CSL	CSL	Col	1	7	2	55	52
CS1958	1	RIL	RIL	Ler	1	7	3	58	23
CS1905	1	RIL	RIL	Ler	1	7	4
CxL_25	2	CSL	CSL	Col	1	7	5	58	34
CxL_COL	2	WT	Col	Col	1	7	6	58	43
CS1940	1	RIL	RIL	Ler	1	7	7	55	18
CxL_09	2	CSL	CSL	Col	1	7	8	61	18
CxL_28	2	CSL	CSL	Col	1	7	9	48	47
CxL_09	2	CSL	CSL	Col	1	7	10	50	31
CS1964	1	RIL	RIL	Ler	1	7	11	59	29
CxL_LER	2	WT	Ler	Ler	1	7	12	54	46
CxL_21	2	CSL	CSL	Col	1	8	1
CxL_16	2	CSL	CSL	Col	1	8	2	44	48
CxL_05	2	CSL	CSL	Col	1	8	3	69	27
CxL_32	2	CSL	Ler	Col	1	8	4	51	53
CS1962	1	RIL	RIL	Ler	1	8	5
CS1957	1	RIL	RIL	Ler	1	8	6	66	21
CxL_02	2	CSL	CSL	Col	1	8	7	48	49
CS4686	1	RIL	RIL	Ler	1	8	8	53	113
CxL_16	2	CSL	CSL	Col	1	8	9	42	35
CxL_21	2	CSL	CSL	Col	1	8	10
CxL_10	2	CSL	CSL	Col	1	8	11	41	41
CxL_02	2	CSL	CSL	Col	1	8	12	44	73
CxL_18	2	CSL	CSL	Col	1	9	1	51	138
CxL_23	2	CSL	CSL	Col	1	9	2	68	46
CxL_14	2	CSL	CSL	Col	1	9	3	49	43
CxL_23	2	CSL	CSL	Col	1	9	4
CS1954	1	RIL	RIL	Ler	1	9	5	56	50
CxL_08	2	CSL	CSL	Col	1	9	6	48	71
CS1998	1	RIL	RIL	Ler	1	9	7	57	22
CS1993	1	RIL	RIL	Ler	1	9	8	55	59
CxL_30	2	CSL	CSL	Col	1	9	9	42	51
CxL_29	2	CSL	CSL	Col	1	9	10
CxL_06	2	CSL	CSL	Col	1	9	11	48	80
CS1900	1	RIL	RIL	Ler	1	9	12	45	127
CxL_15	2	CSL	CSL	Col	1	10	1	61	14
CS1930	1	RIL	RIL	Ler	1	10	2	63	24
CS1967	1	RIL	RIL	Ler	1	10	3
CS1904	1	RIL	RIL	Ler	1	10	4
CS1955	1	RIL	RIL	Ler	1	10	5	60	64
CxL_17	2	CSL	CSL	Col	1	10	6
CS1946	1	RIL	RIL	Ler	1	10	7	57	30
CS1913	1	RIL	RIL	Ler	1	10	8	59	16
CS1968	1	RIL	RIL	Ler	1	10	9
CxL_26	2	CSL	CSL	Col	1	10	10	48	48
CxL_01	2	CSL	Col	Col	1	10	11	57	60
CxL_14	2	CSL	CSL	Col	1	10	12	45	36
CS1961	1	RIL	RIL	Ler	1	11	1	58	27
CS1944	1	RIL	RIL	Ler	1	11	2
CxL_05	2	CSL	CSL	Col	1	11	3
CxL_32	2	CSL	Ler	Col	1	11	4	51	48
CxL_01	2	CSL	Col	Col	1	11	5	60	51
CxL_20	2	CSL	CSL	Col	1	11	6	51	97
CS1952	1	RIL	RIL	Ler	1	11	7	47	31
CS1950	1	RIL	RIL	Ler	1	11	8	68	17
CS1982	1	RIL	RIL	Ler	1	11	9	56	26
CS1932	1	RIL	RIL	Ler	1	11	10	53	126
CxL_28	2	CSL	CSL	Col	1	11	11	50	48
CxL_13	2	CSL	CSL	Col	1	11	12	63	15
CxL_16	2	CSL	CSL	Col	1	12	1
CxL_21	2	CSL	CSL	Col	1	12	2
CxL_COL	2	WT	Col	Col	1	12	3	56	40
CxL_20	2	CSL	CSL	Col	1	12	4	53	167
CS1991	1	RIL	RIL	Ler	1	12	5	52	31
CS1922	1	RIL	RIL	Ler	1	12	6	65	25
CxL_12	2	CSL	CSL	Col	1	12	7	42	52
CS1914	1	RIL	RIL	Ler	1	12	8	47	45
CxL_31	2	CSL	CSL	Col	1	12	9	52	31
CS1923	1	RIL	RIL	Ler	1	12	10	58	22
CxL_19	2	CSL	CSL	Col	1	12	11	54	52
CxL_24	2	CSL	CSL	Col	1	12	12	53	151
CS1915	1	RIL	RIL	Ler	1	13	1	58	15
CxL_COL	2	WT	Col	Col	1	13	2
CxL_29	2	CSL	CSL	Col	1	13	3
CS1981	1	RIL	RIL	Ler	1	13	4	58	69
CS1960	1	RIL	RIL	Ler	1	13	5	59	22
CxL_05	2	CSL	CSL	Col	1	13	6	67	22
CxL_15	2	CSL	CSL	Col	1	13	7
CS1969	1	RIL	RIL	Ler	1	13	8	56	26
CS1947	1	RIL	RIL	Ler	1	13	9	44	31
CS1908	1	RIL	RIL	Ler	1	13	10	50	24
CxL_22	2	CSL	CSL	Col	1	13	11
CS1987	1	RIL	RIL	Ler	1	13	12	54	29
CxL_18	2	CSL	CSL	Col	1	14	1	53	121
CxL_19	2	CSL	CSL	Col	1	14	2	66	61
CS1933	1	RIL	RIL	Ler	1	14	3	60	25
CS1979	1	RIL	RIL	Ler	1	14	4	50	79
CS1994	1	RIL	RIL	Ler	1	14	5	60	15
CS1983	1	RIL	RIL	Ler	1	14	6	58	22
CxL_LER	2	WT	Ler	Ler	1	14	7	53	38
CxL_29	2	CSL	CSL	Col	1	14	8
CxL_13	2	CSL	CSL	Col	1	14	9	59	18
CS1919	1	RIL	RIL	Ler	1	14	10
CxL_25	2	CSL	CSL	Col	1	14	11	61	22
CxL_06	2	CSL	CSL	Col	1	14	12	48	77
CxL_30	2	CSL	CSL	Col	1	15	1	46	71
CxL_29	2	CSL	CSL	Col	1	15	2
CxL_23	2	CSL	CSL	Col	1	15	3
CS1995	1	RIL	RIL	Ler	1	15	4	62	27
CxL_LER	2	WT	Ler	Ler	1	15	5	49	33
CxL_13	2	CSL	CSL	Col	1	15	6	64	11
CxL_20	2	CSL	CSL	Col	1	15	7	53	103
CxL_13	2	CSL	CSL	Col	1	15	8	56	10
CS1917	1	RIL	RIL	Ler	1	15	9
CxL_28	2	CSL	CSL	Col	1	15	10	46	35
CxL_25	2	CSL	CSL	Col	1	15	11	55	31
CS1956	1	RIL	RIL	Ler	1	15	12	48	13
CxL_24	2	CSL	CSL	Col	1	16	1	52	156
CxL_31	2	CSL	CSL	Col	1	16	2	53	34
CxL_21	2	CSL	CSL	Col	1	16	3	55	114
CxL_04	2	CSL	CSL	Col	1	16	4	49	85
CS1996	1	RIL	RIL	Ler	1	16	5	63	20
CS1909	1	RIL	RIL	Ler	1	16	6	55	61
CS1911	1	RIL	RIL	Ler	1	16	7	50	49
CS1945	1	RIL	RIL	Ler	1	16	8	54	82
CxL_12	2	CSL	CSL	Col	1	16	9	43	71
CxL_22	2	CSL	CSL	Col	1	16	10	49	133
CxL_27	2	CSL	CSL	Col	1	16	11	50	18
CS1925	1	RIL	RIL	Ler	1	16	12	51	35
CxL_15	2	CSL	CSL	Col	1	17	1	62	14
CxL_07	2	CSL	CSL	Col	1	17	2	66	24
CxL_17	2	CSL	CSL	Col	1	17	3	57	67
CxL_22	2	CSL	CSL	Col	1	17	4	47	111
CS20_LER	1	WT	Ler	Ler	1	17	5	53	44
CxL_19	2	CSL	CSL	Col	1	17	6	60	91
CxL_24	2	CSL	CSL	Col	1	17	7	52	122
CxL_04	2	CSL	CSL	Col	1	17	8	46	64
CxL_06	2	CSL	CSL	Col	1	17	9	46	79
CxL_17	2	CSL	CSL	Col	1	17	10
CxL_20	2	CSL	CSL	Col	1	17	11	50	94
CS1926	1	RIL	RIL	Ler	1	17	12	44	58
CxL_08	2	CSL	CSL	Col	1	18	1	43	104
CS1992	1	RIL	RIL	Ler	1	18	2	54	56
CxL_07	2	CSL	CSL	Col	1	18	3	73	24
CS1984	1	RIL	RIL	Ler	1	18	4	58	26
CxL_04	2	CSL	CSL	Col	1	18	5	46	101
CxL_30	2	CSL	CSL	Col	1	18	6	42	60
CS1931	1	RIL	RIL	Ler	1	18	7	56	22
CS1943	1	RIL	RIL	Ler	1	18	8	58	19
CxL_11	2	CSL	CSL	Col	1	18	9	50	21
CxL_18	2	CSL	CSL	Col	1	18	10
CxL_26	2	CSL	CSL	Col	1	18	11	44	32
CxL_29	2	CSL	CSL	Col	1	18	12
CxL_21	2	CSL	CSL	Col	1	19	1
CS1927	1	RIL	RIL	Ler	1	19	2	50	29
CxL_22	2	CSL	CSL	Col	1	19	3	48	118
CS1999	1	RIL	RIL	Ler	1	19	4
CxL_01	2	CSL	Col	Col	1	19	5	57	53
CS1941	1	RIL	RIL	Ler	1	19	6	53	43
CS1953	1	RIL	RIL	Ler	1	19	7	48	67
CxL_10	2	CSL	CSL	Col	1	19	8	42	53
CS1949	1	RIL	RIL	Ler	1	19	9	60	52
CxL_05	2	CSL	CSL	Col	1	19	10	68	16
CxL_15	2	CSL	CSL	Col	1	19	11	64	13
CS1942	1	RIL	RIL	Ler	1	19	12	49	22
CS1916	1	RIL	RIL	Ler	1	20	1	55	45
CS1980	1	RIL	RIL	Ler	1	20	2	54	25
CxL_25	2	CSL	CSL	Col	1	20	3	50	58
CS1938	1	RIL	RIL	Ler	1	20	4	50	23
CxL_31	2	CSL	CSL	Col	1	20	5
CxL_11	2	CSL	CSL	Col	1	20	6	50	22
CS1951	1	RIL	RIL	Ler	1	20	7	54	22
CxL_12	2	CSL	CSL	Col	1	20	8	43	69
CS1973	1	RIL	RIL	Ler	1	20	9	57	108
CxL_01	2	CSL	Col	Col	1	20	10	56	45
CxL_21	2	CSL	CSL	Col	1	20	11	56	175
CS1976	1	RIL	RIL	Ler	1	20	12	53	20
CxL_16	2	CSL	CSL	Col	2	21	1	46	62
CS1904	1	RIL	RIL	Ler	2	21	2	72	79
CxL_03	2	CSL	CSL	Col	2	21	3	54	45
CS1948	1	RIL	RIL	Ler	2	21	4	59	76
CS1938	1	RIL	RIL	Ler	2	21	5	48	24
CS4686	1	RIL	RIL	Ler	2	21	6	49	71
CxL_21	2	CSL	CSL	Col	2	21	7	50	196
CS1959	1	RIL	RIL	Ler	2	21	8	55	23
CxL_04	2	CSL	CSL	Col	2	21	9	45	64
CS1950	1	RIL	RIL	Ler	2	21	10	60	22
CxL_18	2	CSL	CSL	Col	2	21	11	48	92
CxL_19	2	CSL	CSL	Col	2	21	12	60	84
CxL_01	2	CSL	Col	Col	2	22	1	55	49
CxL_17	2	CSL	CSL	Col	2	22	2	61	49
CS1997	1	RIL	RIL	Ler	2	22	3	55	50
CS1905	1	RIL	RIL	Ler	2	22	4	56	111
CxL_16	2	CSL	CSL	Col	2	22	5
CxL_07	2	CSL	CSL	Col	2	22	6	64	25
CxL_10	2	CSL	CSL	Col	2	22	7
CS1985	1	RIL	RIL	Ler	2	22	8	61	22
CS1954	1	RIL	RIL	Ler	2	22	9
CxL_30	2	CSL	CSL	Col	2	22	10	40	52
CxL_25	2	CSL	CSL	Col	2	22	11	52	23
CxL_08	2	CSL	CSL	Col	2	22	12
CxL_COL	2	WT	Col	Col	2	23	1	64	55
CxL_07	2	CSL	CSL	Col	2	23	2	61	27
CS1927	1	RIL	RIL	Ler	2	23	3	49	20
CS1916	1	RIL	RIL	Ler	2	23	4
CxL_25	2	CSL	CSL	Col	2	23	5	53	22
CxL_32	2	CSL	Ler	Col	2	23	6	48	44
CS1996	1	RIL	RIL	Ler	2	23	7	57	25
CS1977	1	RIL	RIL	Ler	2	23	8	47	36
CS1986	1	RIL	RIL	Ler	2	23	9
CxL_COL	2	WT	Col	Col	2	23	10	61	46
CxL_27	2	CSL	CSL	Col	2	23	11	49	16
CxL_24	2	CSL	CSL	Col	2	23	12	53	113
CS1964	1	RIL	RIL	Ler	2	24	1	59	30
CxL_21	2	CSL	CSL	Col	2	24	2	47	149
CS1926	1	RIL	RIL	Ler	2	24	3	43	98
CxL_16	2	CSL	CSL	Col	2	24	4	43	57
CxL_02	2	CSL	CSL	Col	2	24	5	46	86
CxL_14	2	CSL	CSL	Col	2	24	6
CS1946	1	RIL	RIL	Ler	2	24	7	55	31
CS1929	1	RIL	RIL	Ler	2	24	8	52	63
CxL_01	2	CSL	Col	Col	2	24	9	55	57
CS1991	1	RIL	RIL	Ler	2	24	10	56	17
CxL_09	2	CSL	CSL	Col	2	24	11	54	13
CS1998	1	RIL	RIL	Ler	2	24	12	56	15
CS1953	1	RIL	RIL	Ler	2	25	1
CxL_07	2	CSL	CSL	Col	2	25	2	59	25
CxL_05	2	CSL	CSL	Col	2	25	3
CS1911	1	RIL	RIL	Ler	2	25	4	48	71
CS1994	1	RIL	RIL	Ler	2	25	5	52	22
CxL_14	2	CSL	CSL	Col	2	25	6	43	59
CxL_COL	2	WT	Col	Col	2	25	7	56	28
CxL_13	2	CSL	CSL	Col	2	25	8	55	21
CS1910	1	RIL	RIL	Ler	2	25	9	61	26
CxL_06	2	CSL	CSL	Col	2	25	10	50	64
CxL_19	2	CSL	CSL	Col	2	25	11	56	80
CxL_14	2	CSL	CSL	Col	2	25	12	43	53
CxL_06	2	CSL	CSL	Col	2	26	1	49	71
CxL_23	2	CSL	CSL	Col	2	26	2	67	25
CxL_13	2	CSL	CSL	Col	2	26	3	60	19
CS1931	1	RIL	RIL	Ler	2	26	4	54	31
CS1935	1	RIL	RIL	Ler	2	26	5	53	22
CS1934	1	RIL	RIL	Ler	2	26	6	51	28
CxL_27	2	CSL	CSL	Col	2	26	7
CxL_20	2	CSL	CSL	Col	2	26	8	49	129
CS1914	1	RIL	RIL	Ler	2	26	9	48	43
CS1967	1	RIL	RIL	Ler	2	26	10	55	23
CxL_01	2	CSL	Col	Col	2	26	11	57	53
CS1982	1	RIL	RIL	Ler	2	26	12	64	10
CS1918	1	RIL	RIL	Ler	2	27	1	51	36
CxL_10	2	CSL	CSL	Col	2	27	2	40	47
CxL_08	2	CSL	CSL	Col	2	27	3	44	77
CxL_17	2	CSL	CSL	Col	2	27	4	59	81
CS1945	1	RIL	RIL	Ler	2	27	5	56	107
CxL_COL	2	WT	Col	Col	2	27	6	60	41
CxL_20	2	CSL	CSL	Col	2	27	7	49	95
CxL_04	2	CSL	CSL	Col	2	27	8	48	109
CxL_15	2	CSL	CSL	Col	2	27	9	60	14
CxL_28	2	CSL	CSL	Col	2	27	10	48	43
CS1956	1	RIL	RIL	Ler	2	27	11	58	20
CS1920	1	RIL	RIL	Ler	2	27	12	47	37
CxL_30	2	CSL	CSL	Col	2	28	1	43	61
CxL_27	2	CSL	CSL	Col	2	28	2
CS1965	1	RIL	RIL	Ler	2	28	3
CS1969	1	RIL	RIL	Ler	2	28	4	59	25
CxL_20	2	CSL	CSL	Col	2	28	5	50	142
CS1989	1	RIL	RIL	Ler	2	28	6	52	83
CS1900	1	RIL	RIL	Ler	2	28	7
CxL_25	2	CSL	CSL	Col	2	28	8	52	38
CS1976	1	RIL	RIL	Ler	2	28	9	55	32
CS1903	1	RIL	RIL	Ler	2	28	10	58	35
CS1949	1	RIL	RIL	Ler	2	28	11	57	48
CxL_25	2	CSL	CSL	Col	2	28	12	51
CS1940	1	RIL	RIL	Ler	2	29	1	55	27
CxL_21	2	CSL	CSL	Col	2	29	2
CS1912	1	RIL	RIL	Ler	2	29	3	51	14
CxL_03	2	CSL	CSL	Col	2	29	4	56	47
CxL_01	2	CSL	Col	Col	2	29	5
CS1966	1	RIL	RIL	Ler	2	29	6	61	26
CxL_18	2	CSL	CSL	Col	2	29	7	48	111
CS1990	1	RIL	RIL	Ler	2	29	8	59	17
CS1993	1	RIL	RIL	Ler	2	29	9	55	48
CxL_12	2	CSL	CSL	Col	2	29	10	43	60
CxL_03	2	CSL	CSL	Col	2	29	11
CS1971	1	RIL	RIL	Ler	2	29	12	46	133
CS1957	1	RIL	RIL	Ler	2	30	1	58	37
CS1968	1	RIL	RIL	Ler	2	30	2	61	28
CxL_03	2	CSL	CSL	Col	2	30	3	57	48
CxL_18	2	CSL	CSL	Col	2	30	4	51	157
CxL_21	2	CSL	CSL	Col	2	30	5
CS1906	1	RIL	RIL	Ler	2	30	6	47	23
CS1939	1	RIL	RIL	Ler	2	30	7
CS1979	1	RIL	RIL	Ler	2	30	8	48	54
CS1978	1	RIL	RIL	Ler	2	30	9	51	65
CxL_14	2	CSL	CSL	Col	2	30	10	43	45
CS1972	1	RIL	RIL	Ler	2	30	11	58	23
CxL_22	2	CSL	CSL	Col	2	30	12	52	121
CxL_LER	2	WT	Ler	Ler	2	31	1	51	53
CxL_29	2	CSL	CSL	Col	2	31	2
CxL_31	2	CSL	CSL	Col	2	31	3	54	28
CxL_05	2	CSL	CSL	Col	2	31	4
CxL_27	2	CSL	CSL	Col	2	31	5	50	28
CxL_04	2	CSL	CSL	Col	2	31	6	44	85
CS1944	1	RIL	RIL	Ler	2	31	7	59	48
CxL_LER	2	WT	Ler	Ler	2	31	8	51	46
CxL_28	2	CSL	CSL	Col	2	31	9	52	58
CS1970	1	RIL	RIL	Ler	2	31	10	52	33
CxL_32	2	CSL	Ler	Col	2	31	11	47	36
CxL_09	2	CSL	CSL	Col	2	31	12	52	27
CxL_31	2	CSL	CSL	Col	2	32	1	52	36
CxL_26	2	CSL	CSL	Col	2	32	2	51	55
CS1933	1	RIL	RIL	Ler	2	32	3	56	24
CxL_LER	2	WT	Ler	Ler	2	32	4
CxL_11	2	CSL	CSL	Col	2	32	5	51	20
CxL_24	2	CSL	CSL	Col	2	32	6	55	134
CxL_12	2	CSL	CSL	Col	2	32	7	41	38
CxL_29	2	CSL	CSL	Col	2	32	8	48	62
CS1962	1	RIL	RIL	Ler	2	32	9
CxL_26	2	CSL	CSL	Col	2	32	10	47	45
CxL_32	2	CSL	Ler	Col	2	32	11	51	60
CxL_08	2	CSL	CSL	Col	2	32	12	48	67
CS1921	1	RIL	RIL	Ler	2	33	1	60	33
CS1917	1	RIL	RIL	Ler	2	33	2	59	24
CxL_09	2	CSL	CSL	Col	2	33	3	57	46
CS1919	1	RIL	RIL	Ler	2	33	4	59	18
CxL_LER	2	WT	Ler	Ler	2	33	5
CS1999	1	RIL	RIL	Ler	2	33	6	62	138
CxL_28	2	CSL	CSL	Col	2	33	7	49	54
CxL_02	2	CSL	CSL	Col	2	33	8	47	63
CS1992	1	RIL	RIL	Ler	2	33	9	53	65
CS1983	1	RIL	RIL	Ler	2	33	10	62	22
CS1961	1	RIL	RIL	Ler	2	33	11	54	17
CS1913	1	RIL	RIL	Ler	2	33	12	57	19
CS1960	1	RIL	RIL	Ler	2	34	1	59	21
CS1901	1	RIL	RIL	Ler	2	34	2	55	77
CS1923	1	RIL	RIL	Ler	2	34	3	56	20
CxL_11	2	CSL	CSL	Col	2	34	4	52	24
CxL_29	2	CSL	CSL	Col	2	34	5
CS1941	1	RIL	RIL	Ler	2	34	6	57	32
CxL_19	2	CSL	CSL	Col	2	34	7	59	104
CxL_10	2	CSL	CSL	Col	2	34	8	41	40
CxL_30	2	CSL	CSL	Col	2	34	9	43	59
CxL_06	2	CSL	CSL	Col	2	34	10	51	67
CxL_12	2	CSL	CSL	Col	2	34	11	43	66
CS1932	1	RIL	RIL	Ler	2	34	12	53	92
CxL_15	2	CSL	CSL	Col	2	35	1
CS1930	1	RIL	RIL	Ler	2	35	2	57	29
CS1922	1	RIL	RIL	Ler	2	35	3	59	32
CxL_07	2	CSL	CSL	Col	2	35	4	69	24
CxL_29	2	CSL	CSL	Col	2	35	5	59	35
CS1925	1	RIL	RIL	Ler	2	35	6	56	62
CxL_05	2	CSL	CSL	Col	2	35	7	66	36
CxL_12	2	CSL	CSL	Col	2	35	8	41	37
CxL_17	2	CSL	CSL	Col	2	35	9	61	73
CS1952	1	RIL	RIL	Ler	2	35	10	47	33
CxL_31	2	CSL	CSL	Col	2	35	11	55	26
CxL_29	2	CSL	CSL	Col	2	35	12	60	22
CS1942	1	RIL	RIL	Ler	2	36	1	54	26
CS1907	1	RIL	RIL	Ler	2	36	2	58	33
CxL_17	2	CSL	CSL	Col	2	36	3	60	62
CS1943	1	RIL	RIL	Ler	2	36	4	56	95
CxL_16	2	CSL	CSL	Col	2	36	5	44	50
CS933_COL	1	WT	Col	Col	2	36	6	57	49
CxL_30	2	CSL	CSL	Col	2	36	7	44	50
CxL_31	2	CSL	CSL	Col	2	36	8	50	24
CxL_28	2	CSL	CSL	Col	2	36	9	47	37
CS1951	1	RIL	RIL	Ler	2	36	10	55	23
CxL_08	2	CSL	CSL	Col	2	36	11	48	84
CxL_26	2	CSL	CSL	Col	2	36	12	47	42
CxL_29	2	CSL	CSL	Col	2	37	1
CS1909	1	RIL	RIL	Ler	2	37	2	56	78
CS1973	1	RIL	RIL	Ler	2	37	3	52	99
CxL_21	2	CSL	CSL	Col	2	37	4
CS1980	1	RIL	RIL	Ler	2	37	5	53	27
CS1995	1	RIL	RIL	Ler	2	37	6	60	26
CxL_13	2	CSL	CSL	Col	2	37	7	60	19
CxL_10	2	CSL	CSL	Col	2	37	8	42	45
CxL_24	2	CSL	CSL	Col	2	37	9	54	123
CS1955	1	RIL	RIL	Ler	2	37	10	63	61
CS1981	1	RIL	RIL	Ler	2	37	11	57	71
CxL_15	2	CSL	CSL	Col	2	37	12	56	10
CxL_21	2	CSL	CSL	Col	2	38	1
CxL_22	2	CSL	CSL	Col	2	38	2	49	145
CxL_22	2	CSL	CSL	Col	2	38	3	53	97
CxL_02	2	CSL	CSL	Col	2	38	4	46	94
CS1987	1	RIL	RIL	Ler	2	38	5	52	39
CS1915	1	RIL	RIL	Ler	2	38	6	57	16
CS1947	1	RIL	RIL	Ler	2	38	7	46	26
CxL_15	2	CSL	CSL	Col	2	38	8
CxL_24	2	CSL	CSL	Col	2	38	9	52	164
CxL_23	2	CSL	CSL	Col	2	38	10	72	24
CxL_11	2	CSL	CSL	Col	2	38	11	53	25
CS20_LER	1	WT	Ler	Ler	2	38	12	51	23
CxL_20	2	CSL	CSL	Col	2	39	1
CxL_05	2	CSL	CSL	Col	2	39	2	69	36
CxL_18	2	CSL	CSL	Col	2	39	3	49	117
CxL_26	2	CSL	CSL	Col	2	39	4	46	30
CxL_23	2	CSL	CSL	Col	2	39	5
CS1974	1	RIL	RIL	Ler	2	39	6
CS1928	1	RIL	RIL	Ler	2	39	7	59	39
CxL_06	2	CSL	CSL	Col	2	39	8	49	63
CxL_04	2	CSL	CSL	Col	2	39	9	45	62
CxL_02	2	CSL	CSL	Col	2	39	10	49	52
CxL_11	2	CSL	CSL	Col	2	39	11	54	21
CS1958	1	RIL	RIL	Ler	2	39	12	57	26
CS1937	1	RIL	RIL	Ler	2	40	1	55	34
CS1924	1	RIL	RIL	Ler	2	40	2	53	58
CS1963	1	RIL	RIL	Ler	2	40	3	55	46
CxL_09	2	CSL	CSL	Col	2	40	4	54	20
CxL_13	2	CSL	CSL	Col	2	40	5	57	15
CxL_19	2	CSL	CSL	Col	2	40	6	59	53
CxL_32	2	CSL	Ler	Col	2	40	7	48	39
CS1975	1	RIL	RIL	Ler	2	40	8	52	22
CS1984	1	RIL	RIL	Ler	2	40	9	57	34
CS1908	1	RIL	RIL	Ler	2	40	10	56	24
CxL_22	2	CSL	CSL	Col	2	40	11	56	135
CxL_23	2	CSL	CSL	Col	2	40	12	65	51
CxL_03	2	CSL	CSL	Col	3	41	1	55	54
CS1977	1	RIL	RIL	Ler	3	41	2	48	31
CS1935	1	RIL	RIL	Ler	3	41	3	52	22
CS1971	1	RIL	RIL	Ler	3	41	4	49	142
CS1940	1	RIL	RIL	Ler	3	41	5	55	25
CxL_10	2	CSL	CSL	Col	3	41	6	43	60
CS933_COL	1	WT	Col	Col	3	41	7	63	36
CS1970	1	RIL	RIL	Ler	3	41	8	54	25
CxL_08	2	CSL	CSL	Col	3	41	9	47	98
CS1954	1	RIL	RIL	Ler	3	41	10	56	56
CxL_LER	2	WT	Ler	Ler	3	41	11	53	43
CS1981	1	RIL	RIL	Ler	3	41	12	56	62
CS1943	1	RIL	RIL	Ler	3	42	1	53	15
CxL_29	2	CSL	CSL	Col	3	42	2
CxL_04	2	CSL	CSL	Col	3	42	3	45	86
CS1989	1	RIL	RIL	Ler	3	42	4	55	39
CS1956	1	RIL	RIL	Ler	3	42	5	56	19
CS1994	1	RIL	RIL	Ler	3	42	6	60	26
CS1925	1	RIL	RIL	Ler	3	42	7	52	54
CS1986	1	RIL	RIL	Ler	3	42	8	58	26
CxL_COL	2	WT	Col	Col	3	42	9	60	50
CS1931	1	RIL	RIL	Ler	3	42	10	58	43
CxL_31	2	CSL	CSL	Col	3	42	11
CS1906	1	RIL	RIL	Ler	3	42	12	50	39
CxL_23	2	CSL	CSL	Col	3	43	1
CS1999	1	RIL	RIL	Ler	3	43	2	60	83
CxL_10	2	CSL	CSL	Col	3	43	3	43	50
CxL_04	2	CSL	CSL	Col	3	43	4	44	50
CS1979	1	RIL	RIL	Ler	3	43	5	49	31
CxL_31	2	CSL	CSL	Col	3	43	6	58	24
CxL_06	2	CSL	CSL	Col	3	43	7
CxL_32	2	CSL	Ler	Col	3	43	8	42	44
CxL_03	2	CSL	CSL	Col	3	43	9	52	39
CS1942	1	RIL	RIL	Ler	3	43	10	54	21
CxL_01	2	CSL	Col	Col	3	43	11	62	35
CxL_03	2	CSL	CSL	Col	3	43	12	54	40
CS1949	1	RIL	RIL	Ler	3	44	1
CS1915	1	RIL	RIL	Ler	3	44	2	57	19
CxL_11	2	CSL	CSL	Col	3	44	3	51	17
CS1950	1	RIL	RIL	Ler	3	44	4	65	16
CxL_27	2	CSL	CSL	Col	3	44	5	53	25
CxL_11	2	CSL	CSL	Col	3	44	6	53	18
CxL_01	2	CSL	Col	Col	3	44	7
CS1932	1	RIL	RIL	Ler	3	44	8	53	91
CxL_20	2	CSL	CSL	Col	3	44	9	53	148
CS1966	1	RIL	RIL	Ler	3	44	10	63	20
CS1997	1	RIL	RIL	Ler	3	44	11	56	55
CxL_32	2	CSL	Ler	Col	3	44	12	55	58
CS1913	1	RIL	RIL	Ler	3	45	1
CxL_30	2	CSL	CSL	Col	3	45	2	47	58
CS1911	1	RIL	RIL	Ler	3	45	3	54	60
CxL_07	2	CSL	CSL	Col	3	45	4	63	33
CxL_22	2	CSL	CSL	Col	3	45	5	50	135
CxL_04	2	CSL	CSL	Col	3	45	6	46	96
CxL_16	2	CSL	CSL	Col	3	45	7	43	61
CxL_LER	2	WT	Ler	Ler	3	45	8	56	45
CxL_21	2	CSL	CSL	Col	3	45	9
CS1983	1	RIL	RIL	Ler	3	45	10	59	17
CxL_27	2	CSL	CSL	Col	3	45	11
CxL_23	2	CSL	CSL	Col	3	45	12	68	45
CxL_05	2	CSL	CSL	Col	3	46	1	63	26
CxL_12	2	CSL	CSL	Col	3	46	2	44	45
CxL_07	2	CSL	CSL	Col	3	46	3	60	39
CS1995	1	RIL	RIL	Ler	3	46	4	61	22
CxL_29	2	CSL	CSL	Col	3	46	5	63	22
CS1978	1	RIL	RIL	Ler	3	46	6	52	65
CxL_17	2	CSL	CSL	Col	3	46	7	61	67
CxL_05	2	CSL	CSL	Col	3	46	8
CS1990	1	RIL	RIL	Ler	3	46	9	56	13
CxL_21	2	CSL	CSL	Col	3	46	10
CxL_LER	2	WT	Ler	Ler	3	46	11	56	48
CxL_13	2	CSL	CSL	Col	3	46	12
CxL_14	2	CSL	CSL	Col	3	47	1	47	58
CS1946	1	RIL	RIL	Ler	3	47	2
CxL_10	2	CSL	CSL	Col	3	47	3	42	43
CS1923	1	RIL	RIL	Ler	3	47	4	57	36
CxL_14	2	CSL	CSL	Col	3	47	5	47	28
CxL_13	2	CSL	CSL	Col	3	47	6	63	35
CxL_30	2	CSL	CSL	Col	3	47	7	47	56
CS1987	1	RIL	RIL	Ler	3	47	8	51	25
CxL_26	2	CSL	CSL	Col	3	47	9	47	33
CS1948	1	RIL	RIL	Ler	3	47	10	57	53
CxL_22	2	CSL	CSL	Col	3	47	11	51	123
CS1955	1	RIL	RIL	Ler	3	47	12	59	47
CS1965	1	RIL	RIL	Ler	3	48	1	51	23
CS1907	1	RIL	RIL	Ler	3	48	2	51	35
CS1929	1	RIL	RIL	Ler	3	48	3
CxL_02	2	CSL	CSL	Col	3	48	4	50	91
CS1921	1	RIL	RIL	Ler	3	48	5	66	25
CS1947	1	RIL	RIL	Ler	3	48	6	48	37
CS1991	1	RIL	RIL	Ler	3	48	7	51	19
CxL_28	2	CSL	CSL	Col	3	48	8	52	47
CxL_18	2	CSL	CSL	Col	3	48	9	62	113
CxL_18	2	CSL	CSL	Col	3	48	10	55	122
CxL_31	2	CSL	CSL	Col	3	48	11	57	45
CxL_09	2	CSL	CSL	Col	3	48	12	54	23
CxL_COL	2	WT	Col	Col	3	49	1	58	33
CS1922	1	RIL	RIL	Ler	3	49	2	59	36
CxL_28	2	CSL	CSL	Col	3	49	3	49	50
CxL_20	2	CSL	CSL	Col	3	49	4	54	120
CS1996	1	RIL	RIL	Ler	3	49	5	61	27
CxL_19	2	CSL	CSL	Col	3	49	6	59	67
CS1900	1	RIL	RIL	Ler	3	49	7	50	23
CS1944	1	RIL	RIL	Ler	3	49	8	58	35
CxL_22	2	CSL	CSL	Col	3	49	9	50	118
CxL_27	2	CSL	CSL	Col	3	49	10
CxL_11	2	CSL	CSL	Col	3	49	11	56	23
CxL_17	2	CSL	CSL	Col	3	49	12	64	89
CxL_17	2	CSL	CSL	Col	3	50	1	63	61
CS1910	1	RIL	RIL	Ler	3	50	2	64	29
CxL_25	2	CSL	CSL	Col	3	50	3	56	28
CS1941	1	RIL	RIL	Ler	3	50	4	60	44
CS1909	1	RIL	RIL	Ler	3	50	5	57	65
CS1975	1	RIL	RIL	Ler	3	50	6	56	27
CxL_29	2	CSL	CSL	Col	3	50	7
CS1901	1	RIL	RIL	Ler	3	50	8	55	58
CxL_15	2	CSL	CSL	Col	3	50	9	58	13
CS1934	1	RIL	RIL	Ler	3	50	10	53	22
CS1920	1	RIL	RIL	Ler	3	50	11	52	40
CS1919	1	RIL	RIL	Ler	3	50	12	61	17
CS1914	1	RIL	RIL	Ler	3	51	1
CS1963	1	RIL	RIL	Ler	3	51	2	53	33
CS1926	1	RIL	RIL	Ler	3	51	3	44	41
CS1905	1	RIL	RIL	Ler	3	51	4	59	65
CxL_02	2	CSL	CSL	Col	3	51	5	51	62
CxL_23	2	CSL	CSL	Col	3	51	6
CS1998	1	RIL	RIL	Ler	3	51	7	61	11
CxL_16	2	CSL	CSL	Col	3	51	8	45	39
CxL_12	2	CSL	CSL	Col	3	51	9	43	45
CS1967	1	RIL	RIL	Ler	3	51	10	55	21
CxL_16	2	CSL	CSL	Col	3	51	11	45	41
CxL_19	2	CSL	CSL	Col	3	51	12	61	127
CxL_06	2	CSL	CSL	Col	3	52	1	49	61
CxL_30	2	CSL	CSL	Col	3	52	2	48	58
CxL_09	2	CSL	CSL	Col	3	52	3	53	25
CS1973	1	RIL	RIL	Ler	3	52	4	57	126
CxL_24	2	CSL	CSL	Col	3	52	5	56	112
CS1939	1	RIL	RIL	Ler	3	52	6	57	29
CS1969	1	RIL	RIL	Ler	3	52	7	58	29
CxL_01	2	CSL	Col	Col	3	52	8
CxL_09	2	CSL	CSL	Col	3	52	9	54	26
CxL_02	2	CSL	CSL	Col	3	52	10	45	64
CxL_08	2	CSL	CSL	Col	3	52	11	46	87
CS1957	1	RIL	RIL	Ler	3	52	12	63	36
CxL_14	2	CSL	CSL	Col	3	53	1	48	42
CxL_02	2	CSL	CSL	Col	3	53	2	47	68
CS1962	1	RIL	RIL	Ler	3	53	3
CxL_21	2	CSL	CSL	Col	3	53	4
CxL_10	2	CSL	CSL	Col	3	53	5	47	42
CS1903	1	RIL	RIL	Ler	3	53	6	60	35
CxL_COL	2	WT	Col	Col	3	53	7
CxL_12	2	CSL	CSL	Col	3	53	8	44	32
CS1958	1	RIL	RIL	Ler	3	53	9	61	25
CS1964	1	RIL	RIL	Ler	3	53	10	60	20
CxL_29	2	CSL	CSL	Col	3	53	11
CxL_06	2	CSL	CSL	Col	3	53	12	51	56
CxL_20	2	CSL	CSL	Col	3	54	1	54	121
CS1904	1	RIL	RIL	Ler	3	54	2	62	55
CxL_25	2	CSL	CSL	Col	3	54	3	57	23
CS1912	1	RIL	RIL	Ler	3	54	4	56	21
CS1952	1	RIL	RIL	Ler	3	54	5	50	30
CS1937	1	RIL	RIL	Ler	3	54	6	60	27
CS1982	1	RIL	RIL	Ler	3	54	7	58	28
CxL_LER	2	WT	Ler	Ler	3	54	8	53	39
CS20_LER	1	WT	Ler	Ler	3	54	9	57	35
CS1918	1	RIL	RIL	Ler	3	54	10	54	20
CS1927	1	RIL	RIL	Ler	3	54	11	50	22
CxL_13	2	CSL	CSL	Col	3	54	12	58	13
CS1917	1	RIL	RIL	Ler	3	55	1	61	24
CS1968	1	RIL	RIL	Ler	3	55	2	63	20
CxL_29	2	CSL	CSL	Col	3	55	3
CS1933	1	RIL	RIL	Ler	3	55	4
CxL_06	2	CSL	CSL	Col	3	55	5	51	57
CxL_29	2	CSL	CSL	Col	3	55	6
CS1928	1	RIL	RIL	Ler	3	55	7	59	34
CxL_28	2	CSL	CSL	Col	3	55	8	51	70
CS1993	1	RIL	RIL	Ler	3	55	9	62	31
CS1930	1	RIL	RIL	Ler	3	55	10	59	30
CS1924	1	RIL	RIL	Ler	3	55	11	57	72
CxL_21	2	CSL	CSL	Col	3	55	12
CxL_18	2	CSL	CSL	Col	3	56	1	49	109
CxL_21	2	CSL	CSL	Col	3	56	2
CxL_COL	2	WT	Col	Col	3	56	3	60	44
CxL_19	2	CSL	CSL	Col	3	56	4	65	62
CxL_24	2	CSL	CSL	Col	3	56	5	56	122
CxL_20	2	CSL	CSL	Col	3	56	6	54	152
CxL_21	2	CSL	CSL	Col	3	56	7	52	98
CxL_08	2	CSL	CSL	Col	3	56	8	47	72
CS1985	1	RIL	RIL	Ler	3	56	9	63	17
CxL_19	2	CSL	CSL	Col	3	56	10	61	80
CS1945	1	RIL	RIL	Ler	3	56	11	52	57
CS1992	1	RIL	RIL	Ler	3	56	12	50	74
CxL_09	2	CSL	CSL	Col	3	57	1	59	34
CxL_08	2	CSL	CSL	Col	3	57	2	50	58
CxL_07	2	CSL	CSL	Col	3	57	3	75	34
CxL_18	2	CSL	CSL	Col	3	57	4	53	103
CxL_26	2	CSL	CSL	Col	3	57	5	52	40
CxL_32	2	CSL	Ler	Col	3	57	6
CxL_15	2	CSL	CSL	Col	3	57	7	61	17
CS1980	1	RIL	RIL	Ler	3	57	8	54	24
CS1960	1	RIL	RIL	Ler	3	57	9	63
CS1938	1	RIL	RIL	Ler	3	57	10	54	29
CxL_07	2	CSL	CSL	Col	3	57	11	63	23
CxL_26	2	CSL	CSL	Col	3	57	12	51	42
CxL_15	2	CSL	CSL	Col	3	58	1	65	10
CxL_15	2	CSL	CSL	Col	3	58	2
CS1916	1	RIL	RIL	Ler	3	58	3	63	40
CxL_11	2	CSL	CSL	Col	3	58	4	60	23
CxL_17	2	CSL	CSL	Col	3	58	5	62	62
CS1984	1	RIL	RIL	Ler	3	58	6
CS1974	1	RIL	RIL	Ler	3	58	7	53	43
CxL_22	2	CSL	CSL	Col	3	58	8	53	135
CS1951	1	RIL	RIL	Ler	3	58	9	57	15
CxL_31	2	CSL	CSL	Col	3	58	10	56	32
CxL_27	2	CSL	CSL	Col	3	58	11
CxL_26	2	CSL	CSL	Col	3	58	12
CxL_05	2	CSL	CSL	Col	3	59	1
CxL_25	2	CSL	CSL	Col	3	59	2	59	34
CxL_04	2	CSL	CSL	Col	3	59	3	49	73
CxL_25	2	CSL	CSL	Col	3	59	4	61
CS1961	1	RIL	RIL	Ler	3	59	5	61	32
CS1959	1	RIL	RIL	Ler	3	59	6	59	25
CS1972	1	RIL	RIL	Ler	3	59	7	60	23
CxL_05	2	CSL	CSL	Col	3	59	8
CxL_16	2	CSL	CSL	Col	3	59	9	47	51
CxL_12	2	CSL	CSL	Col	3	59	10	43	61
CxL_01	2	CSL	Col	Col	3	59	11	61	56
CxL_13	2	CSL	CSL	Col	3	59	12	55	13
CxL_32	2	CSL	Ler	Col	3	60	1	55	37
CxL_24	2	CSL	CSL	Col	3	60	2	58	131
CS1908	1	RIL	RIL	Ler	3	60	3	58	17
CxL_23	2	CSL	CSL	Col	3	60	4	65	64
CS4686	1	RIL	RIL	Ler	3	60	5	56	113
CS1953	1	RIL	RIL	Ler	3	60	6	61	49
CxL_14	2	CSL	CSL	Col	3	60	7
CxL_24	2	CSL	CSL	Col	3	60	8	57	200
CS1976	1	RIL	RIL	Ler	3	60	9	56	28
CxL_30	2	CSL	CSL	Col	3	60	10	44	59
CxL_03	2	CSL	CSL	Col	3	60	11	56	41
CxL_28	2	CSL	CSL	Col	3	60	12	53	60

## Sheet: Table S10 Phenotypes NILs
Genotype	Population	Block	X	Y	FT	MSL
C2L-002	1	1	12	6
C2L-002	1	1	3	17
C2L-002	1	2	9	43
C2L-002	1	2	10	49
C2L-003	1	1	10	10	52	61
C2L-003	1	1	3	28	49	35
C2L-003	1	2	7	34
C2L-003	1	2	4	47	51	54
C2L-005	1	1	5	11
C2L-005	1	1	12	22	49	63
C2L-005	1	2	6	33
C2L-005	1	2	1	48	54	122
C2L-009	1	1	5	5
C2L-009	1	1	5	16	45	76
C2L-009	1	2	1	34	49	204
C2L-009	1	2	8	58	53	174
C2L-010	1	1	8	7	58	46
C2L-010	1	1	6	16	57	37
C2L-010	1	2	2	37
C2L-010	1	2	8	53	54	55
C2L-014	1	1	6	10	48	75
C2L-014	1	1	7	26
C2L-014	1	2	1	39	55	165
C2L-014	1	2	10	54	50	147
C2L-016	1	1	6	3	58	139
C2L-016	1	1	2	26	48	89
C2L-016	1	2	5	42
C2L-016	1	2	11	50	53	170
C2L-017	1	1	7	8
C2L-017	1	1	1	25
C2L-017	1	2	10	40
C2L-017	1	2	4	54
C2L-018	1	1	9	6	56	119
C2L-018	1	1	9	23	56	87
C2L-018	1	2	3	35	56	169
C2L-018	1	2	12	58	68	32
C2L-019	1	1	6	1	60	39
C2L-019	1	1	10	29
C2L-019	1	2	9	41	53	68
C2L-019	1	2	1	60	58	60
C2L-021	1	1	11	8
C2L-021	1	1	4	28
C2L-021	1	2	6	31	51	131
C2L-021	1	2	10	46	46	71
C2L-036	1	1	10	7	62	35
C2L-036	1	1	11	24	57	62
C2L-036	1	2	10	43	58	49
C2L-036	1	2	11	54	57	51
C2L-039	1	1	2	3	58	76
C2L-039	1	1	5	28
C2L-039	1	2	5	45	52	54
C2L-039	1	2	6	53	55	56
C2L-042	1	1	10	12	58	147
C2L-042	1	1	11	30	49	72
C2L-042	1	2	9	31	57	90
C2L-042	1	2	10	47	55	90
C2L-047	1	1	3	1	57	154
C2L-047	1	1	2	30
C2L-047	1	2	2	34	56	145
C2L-047	1	2	5	56	57	145
C2L-052	1	1	9	12
C2L-052	1	1	9	25	55	61
C2L-052	1	2	4	36
C2L-052	1	2	11	49	55	42
C2L-056	1	1	6	15	49	139
C2L-056	1	1	5	23
C2L-056	1	2	3	45	53	142
C2L-056	1	2	9	46	49	145
C2L-057	1	1	8	9	52	115
C2L-057	1	1	10	30	54	98
C2L-057	1	2	10	42	57	111
C2L-057	1	2	4	49	53	146
C2L-059	1	1	1	5	57	133
C2L-059	1	1	1	27
C2L-059	1	2	11	45
C2L-059	1	2	6	55	55	111
C2L-062	1	1	6	6	64	48
C2L-062	1	1	10	18
C2L-062	1	2	11	31	53	48
C2L-062	1	2	11	52	53	38
C2L-064	1	1	8	15
C2L-064	1	1	9	20
C2L-064	1	2	10	41
C2L-064	1	2	5	49
C2L-066	1	1	8	2
C2L-066	1	1	1	17	62	69
C2L-066	1	2	8	40	51	65
C2L-066	1	2	6	58	57	70
C2L-072	1	1	4	6
C2L-072	1	1	12	16	50	37
C2L-072	1	2	5	41	51	32
C2L-072	1	2	7	54
C2L-076	1	1	8	8
C2L-076	1	1	3	22	49	111
C2L-076	1	2	1	41
C2L-076	1	2	3	51	60	159
C2L-077	1	1	6	11	54	55
C2L-077	1	1	11	21	48	31
C2L-077	1	2	4	44	49	50
C2L-077	1	2	6	54	55	50
C2L-080	1	1	12	15
C2L-080	1	1	9	19	49	30
C2L-080	1	2	10	35
C2L-080	1	2	8	60	57	47
C2L-082	1	1	4	2
C2L-082	1	1	3	25	56	47
C2L-082	1	2	4	45	54	54
C2L-082	1	2	10	56
C2L-086	1	1	4	12
C2L-086	1	1	9	21
C2L-086	1	2	11	40	49	151
C2L-086	1	2	8	51	57	150
C2L-088	1	1	7	9	60	97
C2L-088	1	1	12	25	51	32
C2L-088	1	2	12	41	63	27
C2L-088	1	2	10	50	50	65
C2L-094	1	1	2	9
C2L-094	1	1	3	24
C2L-094	1	2	2	33	52	39
C2L-094	1	2	12	52	51	56
C2L-095	1	1	5	8	54	75
C2L-095	1	1	3	20	54	60
C2L-095	1	2	7	44	53	75
C2L-095	1	2	5	60
C2L-097	1	1	2	11	54	77
C2L-097	1	1	1	20	53	71
C2L-097	1	2	7	31	48	38
C2L-097	1	2	11	55	55	68
C2L-098	1	1	7	12	60	72
C2L-098	1	1	7	29
C2L-098	1	2	10	45
C2L-098	1	2	11	58	55	135
C2L-100	1	1	12	2
C2L-100	1	1	11	23
C2L-100	1	2	2	36
C2L-100	1	2	2	54
C2L-102	1	1	3	13	56	32
C2L-102	1	1	4	23
C2L-102	1	2	7	42	57	60
C2L-102	1	2	9	56	61	38
C2L-104	1	1	10	6	53	168
C2L-104	1	1	8	28	37	67
C2L-104	1	2	4	33	51	174
C2L-104	1	2	3	56	52	168
C2L-105	1	1	11	4
C2L-105	1	1	3	19	49	70
C2L-105	1	2	8	43	44	37
C2L-105	1	2	1	55	55	58
C2L-109	1	1	3	12	62	86
C2L-109	1	1	7	16	56	168
C2L-109	1	2	6	35
C2L-109	1	2	2	59
C2L-117	1	1	9	13	55	62
C2L-117	1	1	2	25	50	65
C2L-117	1	2	1	37	52	48
C2L-117	1	2	9	60	56	69
C5L-001	2	1	11	2	61	60
C5L-001	2	1	10	16	62	71
C5L-001	2	2	8	44	41	48
C5L-001	2	2	1	57
C5L-002	2	1	7	15
C5L-002	2	1	3	18	57	32
C5L-002	2	2	10	38	50	44
C5L-002	2	2	7	47	52	43
C5L-003	2	1	12	9
C5L-003	2	1	7	23
C5L-003	2	2	4	31
C5L-003	2	2	10	59
C5L-004	2	1	11	1	58	42
C5L-004	2	1	1	19	51	35
C5L-004	2	2	6	38
C5L-004	2	2	12	54	54	37
C5L-006	2	1	3	2
C5L-006	2	1	10	24	50	63
C5L-006	2	2	4	41	54	62
C5L-006	2	2	2	53	51	70
C5L-008	2	1	9	4	57	53
C5L-008	2	1	7	22	50	33
C5L-008	2	2	10	34
C5L-008	2	2	10	52	66	38
C5L-009	2	1	8	14	63	18
C5L-009	2	1	5	29	64	22
C5L-009	2	2	8	39	62	19
C5L-009	2	2	8	59
C5L-014	2	1	12	4
C5L-014	2	1	2	29	44	65
C5L-014	2	2	8	35	46	72
C5L-014	2	2	1	51	47	79
C5L-018	2	1	3	15	47	78
C5L-018	2	1	5	26	49	92
C5L-018	2	2	2	44
C5L-018	2	2	4	58	50	65
C5L-021	2	1	5	14	52	64
C5L-021	2	1	10	28	51	63
C5L-021	2	2	4	37	52	58
C5L-021	2	2	9	51	50	53
C5L-024	2	1	12	5	61	31
C5L-024	2	1	9	28	57	36
C5L-024	2	2	12	35	60	26
C5L-024	2	2	2	52	64	29
C5L-025	2	1	6	13	57	47
C5L-025	2	1	5	20	56	41
C5L-025	2	2	6	34	63	36
C5L-025	2	2	5	57
C5L-026	2	1	7	1
C5L-026	2	1	11	28
C5L-026	2	2	2	40	53	51
C5L-026	2	2	9	49	52	33
C5L-027	2	1	1	4	52	78
C5L-027	2	1	1	16	48	41
C5L-027	2	2	6	32
C5L-027	2	2	6	48
C5L-028	2	1	3	10	63	25
C5L-028	2	1	11	20
C5L-028	2	2	1	43	56	28
C5L-028	2	2	7	46	55	35
C5L-029	2	1	8	1
C5L-029	2	1	6	24	48	47
C5L-029	2	2	5	44	57	56
C5L-029	2	2	3	55	65	25
C5L-031	2	1	10	8	61	21
C5L-031	2	1	5	27	47	25
C5L-031	2	2	11	42
C5L-031	2	2	2	58	63	27
C5L-033	2	1	11	9
C5L-033	2	1	6	28
C5L-033	2	2	3	36
C5L-033	2	2	9	55
C5L-035	2	1	11	13	53	36
C5L-035	2	1	4	27	54	43
C5L-035	2	2	2	39	52	55
C5L-035	2	2	8	47	52	43
C5L-037	2	1	10	15	63	19
C5L-037	2	1	7	24	64	20
C5L-037	2	2	10	32
C5L-037	2	2	7	59
C5L-038	2	1	4	8	62	27
C5L-038	2	1	12	18	58	19
C5L-038	2	2	4	39
C5L-038	2	2	10	53	62	23
C5L-042	2	1	11	14
C5L-042	2	1	1	30	47	52
C5L-042	2	2	12	33
C5L-042	2	2	8	54	53	47
C5L-044	2	1	5	1
C5L-044	2	1	6	20	52	54
C5L-044	2	2	7	45
C5L-044	2	2	1	52	55	42
C5L-045	2	1	3	7	59	63
C5L-045	2	1	6	25	57	21
C5L-045	2	2	9	38	55	39
C5L-045	2	2	10	51	61	48
C5L-046	2	1	1	13	54	122
C5L-046	2	1	10	26	51	25
C5L-046	2	2	1	32
C5L-046	2	2	8	46	61	38
C5L-047	2	1	4	9	54	60
C5L-047	2	1	3	29
C5L-047	2	2	4	32
C5L-047	2	2	9	54	54	57
C5L-048	2	1	7	3	44	30
C5L-048	2	1	3	21	48	62
C5L-048	2	2	7	33	49	85
C5L-048	2	2	4	60	56	58
C5L-050	2	1	10	3
C5L-050	2	1	2	20
C5L-050	2	2	9	37	54	74
C5L-050	2	2	3	54	60	24
C5L-053	2	1	6	9	53	52
C5L-053	2	1	7	17
C5L-053	2	2	11	44	53	37
C5L-053	2	2	10	48	49	51
C5L-055	2	1	7	11	56	20
C5L-055	2	1	10	27
C5L-055	2	2	4	40	58	20
C5L-055	2	2	2	50	55	28
C5L-056	2	1	5	13
C5L-056	2	1	1	21	49	69
C5L-056	2	2	12	31	49	54
C5L-056	2	2	9	58	51	76
C5L-057	2	1	7	13
C5L-057	2	1	9	16
C5L-057	2	2	11	33
C5L-057	2	2	12	55
C5L-059	2	1	9	11	54	35
C5L-059	2	1	2	16
C5L-059	2	2	12	36	51	58
C5L-059	2	2	3	52
C5L-060	2	1	1	9	52	58
C5L-060	2	1	11	19	58	28
C5L-060	2	2	6	45
C5L-060	2	2	2	51
C5L-061	2	1	10	2	63	86
C5L-061	2	1	1	22	54	87
C5L-061	2	2	10	31	45	67
C5L-061	2	2	2	60
C5L-063	2	1	1	14	55	32
C5L-063	2	1	12	17
C5L-063	2	2	2	45
C5L-063	2	2	11	60	57	31
C5L-064	2	1	8	10	46	70
C5L-064	2	1	6	21	47	64
C5L-064	2	2	1	35	44	82
C5L-064	2	2	6	49
C5L-066	2	1	11	6	57	34
C5L-066	2	1	10	21	53	39
C5L-066	2	2	1	45
C5L-066	2	2	3	47	52	37
C5L-067	2	1	9	10
C5L-067	2	1	4	17	67	25
C5L-067	2	2	11	32	60	26
C5L-067	2	2	5	50	62	26
C5L-068	2	1	9	2	58	49
C5L-068	2	1	12	30	53	67
C5L-068	2	2	11	43	54	48
C5L-068	2	2	4	50	55	46
C5L-069	2	1	10	13	65	20
C5L-069	2	1	7	28
C5L-069	2	2	3	41	64	20
C5L-069	2	2	4	59
C5L-071	2	1	4	1	61	24
C5L-071	2	1	3	23	62	21
C5L-071	2	2	5	32
C5L-071	2	2	7	57	63	17
C5L-072	2	1	7	10	61	25
C5L-072	2	1	7	19	55	38
C5L-072	2	2	9	36	57	32
C5L-072	2	2	3	58
C5L-073	2	1	4	3	58	92
C5L-073	2	1	12	19	54	80
C5L-073	2	2	6	40	49	64
C5L-073	2	2	11	59	54	78
C5L-074	2	1	8	3
C5L-074	2	1	4	25
C5L-074	2	2	9	32
C5L-074	2	2	10	58
C5L-077	2	1	8	6	52	57
C5L-077	2	1	8	26	52	66
C5L-077	2	2	12	40	49	82
C5L-077	2	2	3	48	54	59
C5L-080	2	1	5	3	54	84
C5L-080	2	1	1	29
C5L-080	2	2	9	44	45	53
C5L-080	2	2	2	46
C5L-081	2	1	10	4	57	51
C5L-081	2	1	7	21	53	40
C5L-081	2	2	8	36	55	65
C5L-081	2	2	11	53	54	57
C5L-082	2	1	5	7	58	23
C5L-082	2	1	8	22
C5L-082	2	2	10	44	52	46
C5L-082	2	2	12	56	51	33
C5L-083	2	1	3	14	57	42
C5L-083	2	1	10	23
C5L-083	2	2	1	40
C5L-083	2	2	8	55	56	44
C5L-085	2	1	2	7	58	27
C5L-085	2	1	3	30
C5L-085	2	2	12	39	57	28
C5L-085	2	2	10	60
CxL_01	5	1	10	5
CxL_01	5	1	1	24	57	58
CxL_01	5	2	6	37	58	61
CxL_01	5	2	3	49
CxL_02	5	1	2	6
CxL_02	5	1	2	19	49	55
CxL_02	5	2	3	39
CxL_02	5	2	4	57	52	92
CxL_09	5	1	5	9
CxL_09	5	1	4	22	49	25
CxL_09	5	2	2	38	52	26
CxL_09	5	2	1	58	56	38
CxL_24	5	1	9	7
CxL_24	5	1	6	29	54	163
CxL_24	5	2	3	31	55	143
CxL_24	5	2	12	49	58	134
CxL_31	5	1	6	7	57	31
CxL_31	5	1	4	20
CxL_31	5	2	10	33	55	42
CxL_31	5	2	5	58	54	29
CxL_32	5	1	1	15	50	53
CxL_32	5	1	11	27	50	58
CxL_32	5	2	8	37	51	49
CxL_32	5	2	4	48	50	46
L2C-001	3	1	1	1
L2C-001	3	1	2	22
L2C-001	3	2	12	37
L2C-001	3	2	5	46
L2C-002	3	1	4	11
L2C-002	3	1	8	29
L2C-002	3	2	8	38
L2C-002	3	2	3	53
L2C-003	3	1	2	8
L2C-003	3	1	2	24
L2C-003	3	2	2	35
L2C-003	3	2	7	50
L2C-005	3	1	2	15
L2C-005	3	1	5	17	63	25
L2C-005	3	2	7	39
L2C-005	3	2	6	52	56	26
L2C-006	3	1	2	2
L2C-006	3	1	5	19	70	24
L2C-006	3	2	8	42
L2C-006	3	2	8	48	63	20
L2C-007	3	1	11	5	64	38
L2C-007	3	1	7	30	52	30
L2C-007	3	2	6	41
L2C-007	3	2	11	48	53	27
L2C-011	3	1	5	2	59	101
L2C-011	3	1	9	27
L2C-011	3	2	3	38	55	43
L2C-011	3	2	4	52	66	32
L2C-013	3	1	3	9	64	36
L2C-013	3	1	10	20
L2C-013	3	2	7	40	63	21
L2C-013	3	2	5	47
L2C-018	3	1	4	15	56	27
L2C-018	3	1	11	16	59	37
L2C-018	3	2	1	31	57	20
L2C-018	3	2	3	50	57	26
L2C-019	3	1	8	5	63	20
L2C-019	3	1	8	19	46	22
L2C-019	3	2	3	33
L2C-019	3	2	12	50
L2C-020	3	1	10	11
L2C-020	3	1	4	30
L2C-020	3	2	5	37	57	35
L2C-020	3	2	7	58	63	29
L2C-023	3	1	7	5	63	57
L2C-023	3	1	7	25
L2C-023	3	2	2	43
L2C-023	3	2	1	53	62	38
L2C-028	3	1	9	5
L2C-028	3	1	2	17
L2C-028	3	2	2	31
L2C-028	3	2	4	51
L2C-030	3	1	7	6	66	17
L2C-030	3	1	8	20	58	29
L2C-030	3	2	1	36	57	20
L2C-030	3	2	6	51
L2C-031	3	1	5	10	68	19
L2C-031	3	1	11	22	58	28
L2C-031	3	2	6	42	61	29
L2C-031	3	2	7	53	61	35
L2C-032	3	1	10	9
L2C-032	3	1	9	26
L2C-032	3	2	9	34
L2C-032	3	2	12	53
L2C-036	3	1	11	15
L2C-036	3	1	4	21
L2C-036	3	2	12	43
L2C-036	3	2	12	57
L2C-040	3	1	12	13	57	30
L2C-040	3	1	10	22	53	30
L2C-040	3	2	11	36
L2C-040	3	2	8	50	55	32
L2C-041	3	1	3	6	67	18
L2C-041	3	1	6	30	62	22
L2C-041	3	2	12	38	67	27
L2C-041	3	2	12	46	57	24
L2C-044	3	1	9	1	69	38
L2C-044	3	1	11	25
L2C-044	3	2	11	35	58	61
L2C-044	3	2	11	47	64	67
L2C-045	3	1	3	5
L2C-045	3	1	2	21	55	25
L2C-045	3	2	4	38	62	20
L2C-045	3	2	6	59
L2C-052	3	1	6	12
L2C-052	3	1	6	23	55	39
L2C-052	3	2	8	33
L2C-052	3	2	5	53	57	31
L2C-063	3	1	9	8	53	179
L2C-063	3	1	9	17
L2C-063	3	2	1	33	49	40
L2C-063	3	2	5	59	55	46
L2C-073	3	1	7	4	70	28
L2C-073	3	1	5	24
L2C-073	3	2	3	40	56	37
L2C-073	3	2	4	46
L2C-074	3	1	6	4	58	56
L2C-074	3	1	12	28	47	51
L2C-074	3	2	7	38	42	49
L2C-074	3	2	9	57
L2C-079	3	1	9	14
L2C-079	3	1	12	21
L2C-079	3	2	5	34
L2C-079	3	2	6	50
L2C-081	3	1	2	14
L2C-081	3	1	3	16	55	37
L2C-081	3	2	12	42
L2C-081	3	2	11	46	51	38
L2C-084	3	1	1	6	61	66
L2C-084	3	1	8	24
L2C-084	3	2	4	34	54	43
L2C-084	3	2	3	60	68	42
L2C-087	3	1	9	9	53	41
L2C-087	3	1	2	18	52	49
L2C-087	3	2	3	37	50	44
L2C-087	3	2	6	57
L2C-097	3	1	6	8	56	48
L2C-097	3	1	9	30	50	42
L2C-097	3	2	10	36	49	44
L2C-097	3	2	11	57
L2C-098	3	1	1	7	63	36
L2C-098	3	1	2	27	55	68
L2C-098	3	2	5	35	53	51
L2C-098	3	2	6	46	54	49
L2C-099	3	1	8	11	59	75
L2C-099	3	1	12	23	56	55
L2C-099	3	2	11	34
L2C-099	3	2	5	51	54	42
L2C-102	3	1	4	10	64	50
L2C-102	3	1	1	18	64	58
L2C-102	3	2	12	44	61	48
L2C-102	3	2	12	51	65	35
L2C-106	3	1	8	12
L2C-106	3	1	10	19
L2C-106	3	2	10	37	51	24
L2C-106	3	2	5	52	56	24
L2C-114	3	1	5	15
L2C-114	3	1	11	29	58	59
L2C-114	3	2	5	36
L2C-114	3	2	8	56	62	52
L2C-117	3	1	9	3	69	19
L2C-117	3	1	8	30	63	155
L2C-117	3	2	9	35	61	32
L2C-117	3	2	4	55
L2C-118	3	1	11	11	56	48
L2C-118	3	1	10	25	46	45
L2C-118	3	2	5	39	53	42
L2C-118	3	2	1	46
L5C-001	3	1	5	12
L5C-001	3	1	9	24
L5C-001	3	2	11	38	64	57
L5C-001	3	2	7	56	62	55
L5C-002	4	1	12	3	53	66
L5C-002	4	1	7	27	47	52
L5C-002	4	2	2	41
L5C-002	4	2	6	56	54	74
L5C-003	4	1	6	14	53	80
L5C-003	4	1	11	18
L5C-003	4	2	3	43	49	72
L5C-003	4	2	4	56	54	60
L5C-004	4	1	1	8	54	107
L5C-004	4	1	5	21	54	98
L5C-004	4	2	7	32	55	82
L5C-004	4	2	9	52	55	107
L5C-005	4	1	1	2	59	97
L5C-005	4	1	4	18	50	72
L5C-005	4	2	12	32
L5C-005	4	2	7	55
L5C-007	4	1	1	3	53	101
L5C-007	4	1	4	16
L5C-007	4	2	6	39	46	72
L5C-007	4	2	7	51	49	64
L5C-008	4	1	11	12	63	37
L5C-008	4	1	5	18
L5C-008	4	2	7	41	63	53
L5C-008	4	2	3	46	64	38
L5C-013	4	1	10	1	55	92
L5C-013	4	1	3	27
L5C-013	4	2	6	36	50	81
L5C-013	4	2	12	59
L5C-014	4	1	5	6	55	94
L5C-014	4	1	8	27	51	63
L5C-014	4	2	6	44
L5C-014	4	2	9	53	56	70
L5C-015	4	1	9	15	61	39
L5C-015	4	1	1	28	57	45
L5C-015	4	2	9	42	57	38
L5C-015	4	2	1	54	63	33
L5C-016	4	1	12	10	59	68
L5C-016	4	1	1	23	65	42
L5C-016	4	2	1	38
L5C-016	4	2	6	60
L5C-017	4	1	2	4	65	28
L5C-017	4	1	8	17	59	58
L5C-017	4	2	11	41	69	40
L5C-017	4	2	12	47
L5C-018	4	1	3	4	53	66
L5C-018	4	1	3	26	47	64
L5C-018	4	2	5	31	50	74
L5C-018	4	2	2	56
L5C-019	4	1	11	3	55	74
L5C-019	4	1	9	18
L5C-019	4	2	8	34	62	89
L5C-019	4	2	12	48
L5C-020	4	1	8	13	49	93
L5C-020	4	1	10	17	49	100
L5C-020	4	2	7	35	48	88
L5C-020	4	2	4	53	51	103
L5C-023	4	1	2	10
L5C-023	4	1	5	30	70	56
L5C-023	4	2	9	45	61	42
L5C-023	4	2	3	59	65	41
L5C-025	4	1	3	3
L5C-025	4	1	5	22	57	37
L5C-025	4	2	4	43	61	56
L5C-025	4	2	9	47	61	58
L5C-026	4	1	4	14
L5C-026	4	1	12	27
L5C-026	4	2	3	32	57	38
L5C-026	4	2	7	49	59	75
L5C-027	4	1	1	10	53	59
L5C-027	4	1	5	25	49	83
L5C-027	4	2	8	31
L5C-027	4	2	7	48	58	89
L5C-028	4	1	12	12	59	107
L5C-028	4	1	6	27	60	39
L5C-028	4	2	3	34
L5C-028	4	2	5	54	63	48
L5C-031	4	1	7	2	56	83
L5C-031	4	1	1	26
L5C-031	4	2	11	37
L5C-031	4	2	1	59	52	96
L5C-034	4	1	3	8	64	31
L5C-034	4	1	8	23	59	76
L5C-034	4	2	5	43	59	94
L5C-034	4	2	5	48	61	58
L5C-037	4	1	7	14
L5C-037	4	1	12	24
L5C-037	4	2	7	36
L5C-037	4	2	9	48
L5C-039	4	1	2	5	58	97
L5C-039	4	1	4	29
L5C-039	4	2	5	40	52	99
L5C-039	4	2	3	57
L5C-040	4	1	4	13
L5C-040	4	1	12	29
L5C-040	4	2	7	43
L5C-040	4	2	7	52
L5C-041	4	1	2	13
L5C-041	4	1	4	19
L5C-041	4	2	1	44
L5C-041	4	2	1	49
L5C-044	4	1	2	1	67	68
L5C-044	4	1	4	26	52	59
L5C-044	4	2	6	43	49	74
L5C-044	4	2	11	51
L5C-046	4	1	4	5	54	82
L5C-046	4	1	7	20	51	64
L5C-046	4	2	11	39	49	55
L5C-046	4	2	11	56
L5C-047	4	1	6	5
L5C-047	4	1	7	18
L5C-047	4	2	4	42
L5C-047	4	2	7	60
L5C-048	4	1	10	14
L5C-048	4	1	8	25	56	36
L5C-048	4	2	3	44
L5C-048	4	2	8	52	57	33
L5C-050	4	1	1	11	55	60
L5C-050	4	1	6	26
L5C-050	4	2	8	45	62	76
L5C-050	4	2	8	49
L5C-051	4	1	12	1
L5C-051	4	1	8	21
L5C-051	4	2	9	39
L5C-051	4	2	2	48
L5C-054	4	1	7	7	57	97
L5C-054	4	1	11	26
L5C-054	4	2	8	41	52	78
L5C-054	4	2	2	57
L5C-056	4	1	4	7
L5C-056	4	1	6	17
L5C-056	4	2	12	34	59	62
L5C-056	4	2	5	55	65	34
L5C-058	4	1	4	4
L5C-058	4	1	2	23	52	49
L5C-058	4	2	7	37	54	74
L5C-058	4	2	9	50	52	78
L5C-062	4	1	12	11	53	64
L5C-062	4	1	2	28
L5C-062	4	2	2	32	46	52
L5C-062	4	2	12	60	58	66
L5C-065	4	1	3	11	56	95
L5C-065	4	1	4	24	52	99
L5C-065	4	2	1	42
L5C-065	4	2	6	47	49	105
L5C-066	4	1	5	4
L5C-066	4	1	6	18
L5C-066	4	2	5	33
L5C-066	4	2	2	49
L5C-073	4	1	12	8	54	59
L5C-073	4	1	12	26	51	97
L5C-073	4	2	5	38	54	67
L5C-073	4	2	2	55	55	79
L5C-075	4	1	11	10	69	49
L5C-075	4	1	8	16	61	48
L5C-075	4	2	9	40	62	47
L5C-075	4	2	1	56	67	62
L5C-076	4	1	12	14	57	80
L5C-076	4	1	6	22
L5C-076	4	2	4	35	61	45
L5C-076	4	2	10	57	61	86
L5C-077	4	1	1	12	62	39
L5C-077	4	1	11	17	62	39
L5C-077	4	2	2	42
L5C-077	4	2	8	57	63	38
L5C-081	4	1	6	2
L5C-081	4	1	9	29
L5C-081	4	2	9	33
L5C-081	4	2	2	47
L5C-082	4	1	2	12
L5C-082	4	1	9	22	53	44
L5C-082	4	2	10	39
L5C-082	4	2	10	55	50	82
L5C-086	4	1	11	7	53	73
L5C-086	4	1	8	18	57	63
L5C-086	4	2	12	45	49	61
L5C-086	4	2	1	50	54	78

## Sheet: Table S11 BLUPs RILs
Genotype	FT.pv	MSL.pv
CS1900	48.8217	72.5252
CS1901	54.6067	65.0359
CS1903	57.6619	39.9372
CS1904	64.6462	67.0816
CS1905	57.1254	83.1718
CS1906	49.502	36.223
CS1907	54.8506	36.7733
CS1908	53.3858	26.471
CS1909	55.806	67.0926
CS1910	63.9033	30.5585
CS1911	51.9158	58.5029
CS1912	52.9628	21.5125
CS1913	57.5337	21.9437
CS1914	49.0841	45.6285
CS1915	56.8647	18.7962
CS1916	57.0378	43.6841
CS1917	58.4795	28.726
CS1918	53.2374	28.1454
CS1919	58.9642	19.6037
CS1920	50.1675	40.3686
CS1921	60.0266	27.7703
CS1922	60.3128	33.5541
CS1923	57.0222	28.1822
CS1924	55.0908	58.0527
CS1925	53.9028	52.6462
CS1926	45.7305	66.8234
CS1927	50.4232	25.834
CS1928	57.8977	43.4776
CS1929	54.6344	57.4932
CS1930	58.409	28.8014
CS1931	56.136	35.5108
CS1932	53.167	98.3093
CS1933	57.3503	24.9643
CS1934	52.8244	25.6744
CS1935	52.5188	28.1308
CS1937	57.6305	33.5036
CS1938	51.3176	27.2592
CS1939	55.18	28.9458
CS1940	55.1162	25.561
CS1941	56.6193	41.4469
CS1942	53.3145	28.6891
CS1943	56.5017	45.6769
CS1944	57.9884	42.4161
CS1945	54.2725	78.6959
CS1946	56.6788	33.2816
CS1947	47.0277	34.7183
CS1948	56.5146	78.1709
CS1949	58.8595	52.7366
CS1950	63.7815	22.4346
CS1951	55.2029	23.6245
CS1952	48.0165	35.4118
CS1953	53.6491	57.0603
CS1954	55.0041	53.4689
CS1955	59.1882	56.7825
CS1956	54.8137	23.7407
CS1957	61.1218	30.8628
CS1958	57.2265	28.7423
CS1959	56.0265	27.8758
CS1960	59.3328	22.8083
CS1961	55.7157	26.7897
CS1963	54.1083	46.5297
CS1964	59.1448	28.508
CS1965	53.834	31.9284
CS1966	61.7586	30.5363
CS1967	54.7428	27.2225
CS1968	60.1161	28.3939
CS1969	57.3149	28.8904
CS1970	53.4463	33.2137
CS1971	49.1795	130.263
CS1972	57.0053	25.7831
CS1973	55.5519	107.332
CS1974	51.0672	36.4991
CS1975	54.2885	29.429
CS1976	55.0048	29.3885
CS1977	50.0247	38.9495
CS1978	51.7212	62.2447
CS1979	49.6603	54.9641
CS1980	53.4461	27.1852
CS1981	56.0529	67.0189
CS1982	58.7177	27.0259
CS1983	58.7018	23.0856
CS1984	57.1638	33.8369
CS1985	60.2946	22.4966
CS1986	55.9606	33.7047
CS1987	52.9725	34.0311
CS1989	54.219	59.9036
CS1990	57.9428	16.0582
CS1991	53.3401	26.3697
CS1992	52.602	62.8592
CS1993	56.8001	46.9471
CS1994	57.5722	24.1699
CS1995	60.1201	26.8531
CS1996	60.1093	27.4695
CS1997	54.2959	48.5478
CS1998	57.8802	21.4285
CS1999	60.7448	103.42
CS4686	51.9287	94.0772

## Sheet: Table S12 BLUPs NILs
Genotype	FT.pv	MSL.pv
C2L-002
C2L-003	55.9151	66.4025
C2L-005	56.8058	107.401
C2L-009	54.3242	156.859
C2L-010	58.1245	60.7159
C2L-014	55.5029	139.133
C2L-016	56.7336	141.318
C2L-017
C2L-018	60.3413	112.972
C2L-019	57.7925	70.0946
C2L-021	55.7221	111.636
C2L-036	60.278	65.5617
C2L-039	57.5098	75.62
C2L-042	58.77	111.664
C2L-047	58.0201	152.736
C2L-052	58.6318	71.6003
C2L-056	55.74	150.79
C2L-057	57.9211	128.663
C2L-059	57.1866	127.852
C2L-062	58.8671	59.1617
C2L-064
C2L-066	58.6895	82.3634
C2L-072	56.043	54.7007
C2L-076	57.99	143.413
C2L-077	55.9246	64.2238
C2L-080	56.6673	60.4928
C2L-082	58.5642	70.3141
C2L-086	57.4719	155.862
C2L-088	59.3092	72.6426
C2L-094	56.6676	63.6296
C2L-095	57.2912	84.1298
C2L-097	56.7457	78.9324
C2L-098	58.3429	114.912
C2L-100
C2L-102	59.4927	60.5219
C2L-104	53.555	150.999
C2L-105	54.8211	72.6026
C2L-109	59.5078	134.68
C2L-117	56.9303	76.9434
C5L-001	57.5234	66.4822
C5L-002	58.0758	57.5638
C5L-003
C5L-004	57.0121	55.7182
C5L-006	56.2913	70.708
C5L-008	60.333	57.0598
C5L-009	65.9101	44.7209
C5L-014	51.6893	72.3227
C5L-018	52.9477	77.8625
C5L-021	56.1581	67.8202
C5L-024	63.3091	48.1609
C5L-025	62.2229	57.2943
C5L-026	57.3259	57.8038
C5L-027	53.5176	63.7416
C5L-028	61.1486	50.3063
C5L-029	59.945	58.4055
C5L-031	59.058	45.933
C5L-033
C5L-035	57.4342	58.4245
C5L-037	65.5014	48.7342
C5L-038	62.8776	46.769
C5L-042	54.8891	60.518
C5L-044	57.5604	61.3987
C5L-045	61.3805	57.3222
C5L-046	59.6203	69.1232
C5L-047	56.8608	65.7617
C5L-048	52.8142	66.772
C5L-050	59.9077	61.4865
C5L-053	56.1915	60.3512
C5L-055	59.6147	46.6463
C5L-056	54.6643	71.2077
C5L-057
C5L-059	57.2166	60.7844
C5L-060	58.8697	59.8419
C5L-061	57.8015	78.0439
C5L-063	58.0056	52.5419
C5L-064	51.475	74.2928
C5L-066	57.5739	54.6959
C5L-067	65.5825	47.4212
C5L-068	58.5537	62.672
C5L-069	65.658	47.9519
C5L-071	62.939	45.3841
C5L-072	61.4371	53.4517
C5L-073	56.9639	80.1898
C5L-074
C5L-077	56.0171	72.0658
C5L-080	53.6258	68.6051
C5L-081	58.4381	64.5246
C5L-082	56.5755	51.8543
C5L-083	58.7798	58.2111
C5L-085	60.0662	49.9457
CxL_01	62.0819	76.8127
CxL_02	54.5438	85.4935
CxL_09	56.1494	54.4278
CxL_24	60.6143	135.445
CxL_31	57.8072	54.321
CxL_32	55.4015	68.0752
L2C-001
L2C-002
L2C-003
L2C-005	62.4718	49.0262
L2C-006	68.9955	49.2892
L2C-007	60.2485	49.6578
L2C-011	62.3559	60.9758
L2C-013	66.0037	50.5636
L2C-018	61.181	47.0976
L2C-019	58.379	48.1762
L2C-020	62.7687	51.6365
L2C-023	63.2335	55.2797
L2C-028
L2C-030	63.549	46.6534
L2C-031	65.4496	48.6323
L2C-032
L2C-036
L2C-040	59.8062	51.0928
L2C-041	66.7151	44.7942
L2C-044	66.0621	59.536
L2C-045	63.2021	49.256
L2C-052	60.5401	52.9986
L2C-063	55.7302	72.4902
L2C-073	64.5569	50.8409
L2C-074	54.4934	58.2696
L2C-079
L2C-081	58.3318	53.2586
L2C-084	62.5706	56.4296
L2C-087	56.9049	57.0648
L2C-097	56.8853	55.0345
L2C-098	60.5139	57.5442
L2C-099	60.5128	62.0764
L2C-102	66.8394	58.3822
L2C-106	58.8197	49.0578
L2C-114	63.334	58.8487
L2C-117	66.9738	64.4424
L2C-118	57.2015	57.0915
L5C-001	65.3792	59.569
L5C-002	54.565	76.8037
L5C-003	55.3736	82.4419
L5C-004	58.4458	103.069
L5C-005	57.4224	90.8357
L5C-007	53.2912	87.2131
L5C-008	66.0994	63.3515
L5C-013	55.8077	91.679
L5C-014	57.5418	84.2636
L5C-015	62.729	57.9341
L5C-016	64.5952	74.4064
L5C-017	66.055	60.8927
L5C-018	54.5195	79.3626
L5C-019	60.8223	86.7207
L5C-020	53.5277	101.371
L5C-023	67.4666	64.7937
L5C-025	63.7782	69.4791
L5C-026	61.9691	72.2441
L5C-027	57.7171	88.1986
L5C-028	63.4141	78.5849
L5C-031	54.7076	92.1771
L5C-034	63.8904	77.9803
L5C-037
L5C-039	57.9724	97.3313
L5C-040
L5C-041
L5C-044	59.2708	79.5472
L5C-046	55.5946	80.4763
L5C-047
L5C-048	60.6663	61.0154
L5C-050	61.7076	80.9084
L5C-051
L5C-054	57.584	91.1039
L5C-056	64.2093	67.3395
L5C-058	57.8192	81.4147
L5C-062	55.8237	74.948
L5C-065	56.8725	104.462
L5C-066
L5C-073	56.989	86.8188
L5C-075	66.7101	68.707
L5C-076	62.402	81.6815
L5C-077	64.0077	59.7498
L5C-081
L5C-082	56.1013	79.5936
L5C-086	57.0393	81.9994

[truncated: 3 more sheets: Table S13 QTL results RILs, Table S14 QTL results NILs, Table S15 Data CSLs]
